# Supplementary material for: A multi-omics spatiotemporal atlas of the silkworm (Bombyx mori) wing disc and a gene transition model reveals 20-hydroxyecdysone-driven development reprogramming
Source: Research Square preprint supplement (doi:10.21203/rs.3.rs-6477804/v1), 2025-05-09
Supplement: Supplementary file 1 [file 61bc751f400100e9b9fea2c2.xlsx]

## Sheet: Index
	Index for all supplementary tables
	Supplementary Table 1	Single-cell libraries from normal development group samples
	Supplementary Table 2	Cell type of scRNA-seq clusters
	Supplementary Table 3	Numbers of unique molecular identiiers (UMls) and genes detected at bin20 resolution for each set of stereo-seq data
	Supplementary Table 4	The distribution of 60 genes in space and cell types has been reported.
	Supplementary Table 5	Gene list related to Wm transdifferentiation cell fate 1/2
	Supplementary Table 6	RNAi data statistics
	Supplementary Table 7	List of 20E-related reporter genes classified by function
	Supplementary Table 8	10 single-cell libraries from 20E-treated group samples.
	Supplementary Table 9	List of responsive genes at different time points following 20E treatment
	Supplementary Table 10	List of intersecting genes between the 20E-treated group and the scRNA-seq
	Supplementary Table 11	The concentration of 20E in wing discs across developmental timepoints
	Supplementary Table 12	List of stage-specific genes

## Sheet: Table S1
Single cell libraries	Sample name	Timepoint	Tissue	Estimated number of cells	Median UMI counts per cell	Total genes detected	Mean genes per cell	nCells after filterd
1	WD501 2	L5D1	Bombyx wing dics	5796	9866	15178	2656	5053
2	WD502 1	L5D2	Bombyx wing dics	10177	3654	14688	1920	9261
3	WD503 1	L5D3	Bombyx wing dics	16470	7366	15031	2234	14887
4	WD504 1	L5D4	Bombyx wing dics	13936	4446	14680	2076	12815
5	WD505 2	L5D5	Bombyx wing dics	9903	11551	15023	2781	8877
6	WD506 1	L5D6	Bombyx wing dics	17895	11179	15127	2844	15585
7	S WD507 1	L5D7	Bombyx wing dics	9223	10929	15150	2905	7931
8	S WD W1 3	W1	Bombyx wing dics	6613	10098	14956	2569	5947
9	WD W2	W2	Bombyx wing dics	35759	8911	15181	2188	32619
10	P6 2	P6	Bombyx wing dics	13360	4964	15072	1784	12011
11	P6 3	P6	Bombyx wing dics	1258	4586	15885	2717	1055

## Sheet: Table S2
p_val	avg_log2FC	pct.1	pct.2	p_val_adj	celltype	gene
0	6.62167	0.937	0.012	0	Cuticle_3	CPH32
0	6.2854	0.936	0.012	0	Cuticle_3	LOC101745678
0	5.8977	0.903	0.009	0	Cuticle_3	LOC101745531
0	5.77108	0.766	0.087	0	Cuticle_3	LOC101739821
0	5.54645	0.691	0.007	0	Cuticle_3	LOC101745386
0	5.44713	0.83	0.008	0	Cuticle_3	CPR10
0	5.42425	0.764	0.01	0	Cuticle_3	LOC101745826
0	5.40428	0.76	0.008	0	Cuticle_3	CPG1
0	5.34669	0.806	0.009	0	Cuticle_3	CPFL3
0	5.28898	0.972	0.401	0	Cuticle_3	LOC101735832
0	5.12773	0.909	0.008	0	Cuticle_3	CPG13
0	5.07772	0.79	0.006	0	Cuticle_3	CPR37
0	5.07229	0.9	0.157	0	Cuticle_3	LOC692973
0	4.99773	0.751	0.01	0	Cuticle_3	CPR74
0	4.94245	0.778	0.098	0	Cuticle_3	LOC101745456
0	4.9207	0.824	0.005	0	Cuticle_3	LOC101737072
0	4.78415	0.71	0.004	0	Cuticle_3	CPR82
0	4.77836	0.886	0.179	0	Cuticle_3	LOC101745500
0	4.72397	0.388	0.01	0	Cuticle_3	LOC101746910
0	4.69234	0.892	0.046	0	Cuticle_3	CPG24
0	4.57033	0.667	0.04	0	Cuticle_3	CPT3
0	4.35802	0.8	0.087	0	Cuticle_3	LOC100862772
0	4.32343	0.56	0.005	0	Cuticle_3	CPG6
0	4.3173	0.9	0.178	0	Cuticle_3	LOC101742822
0	4.26855	0.305	0.003	0	Cuticle_3	LOC100307012
0	4.24705	0.903	0.175	0	Cuticle_3	LOC733093
0	4.23414	0.855	0.009	0	Cuticle_3	CSP6
0	4.1604	0.893	0.355	0	Cuticle_3	Hsp70
0	4.11841	0.816	0.03	0	Cuticle_3	LOC101744922
0	4.06213	0.79	0.009	0	Cuticle_3	CPR91
0	3.98044	0.506	0.005	0	Cuticle_3	LOC101741205
0	3.97249	0.834	0.041	0	Cuticle_3	CTL5
0	3.93199	0.885	0.324	0	Cuticle_3	E(spl)mbeta
0	3.9138	0.889	0.257	0	Cuticle_3	Adamts-like
0	3.8671	0.518	0.005	0	Cuticle_3	LOC101742416
0	3.82786	0.781	0.056	0	Cuticle_3	LOC101736652
0	3.80355	0.685	0.004	0	Cuticle_3	LOC101739772
0	3.76958	0.97	0.323	0	Cuticle_3	LOC101740648
0	3.66804	0.774	0.008	0	Cuticle_3	LOC101746589
0	3.53981	0.322	0.003	0	Cuticle_3	CSP10
0	3.50893	0.638	0.019	0	Cuticle_3	LOC101741978
0	3.49502	0.703	0.005	0	Cuticle_3	CPR132
0	3.47483	0.483	0.005	0	Cuticle_3	LOC101735305
0	3.39936	0.637	0.165	0	Cuticle_3	CecA
0	3.3897	0.941	0.535	0	Cuticle_3	LOC692810
0	3.37643	0.495	0.026	0	Cuticle_3	LOC101736833
0	3.33695	0.893	0.262	0	Cuticle_3	LOC101741436
0	3.28718	0.684	0.035	0	Cuticle_3	Y-e
0	3.25798	0.771	0.116	0	Cuticle_3	LOC101744120
0	3.23917	0.788	0.082	0	Cuticle_3	LOC101736716
0	3.23433	0.791	0.083	0	Cuticle_3	LOC101739926
0	3.12019	0.645	0.007	0	Cuticle_3	LOC101746811
0	3.09487	0.516	0.005	0	Cuticle_3	CPG20
0	3.04256	0.761	0.047	0	Cuticle_3	Time
0	2.99848	0.732	0.034	0	Cuticle_3	CSP16
0	2.94662	0.683	0.006	0	Cuticle_3	LOC101742705
0	2.90879	0.716	0.142	0	Cuticle_3	LOC101747221
0	2.84552	0.986	0.917	0	Cuticle_3	DnaJ-5
0	2.83912	0.417	0.005	0	Cuticle_3	LOC101746263
0	2.83539	0.605	0.003	0	Cuticle_3	CPG11
0	2.82919	0.613	0.154	0	Cuticle_3	LOC101743035
0	2.80999	0.453	0.057	0	Cuticle_3	LOC101743336
0	2.80445	0.745	0.032	0	Cuticle_3	LOC101735959
0	2.80066	0.358	0.011	0	Cuticle_3	LOC101738773
0	2.79596	0.299	0.003	0	Cuticle_3	CPR73
0	2.75999	0.164	0.005	0	Cuticle_3	LOC101739598
0	2.74775	0.631	0.104	0	Cuticle_3	LOC101737536
0	2.70652	0.646	0.005	0	Cuticle_3	LOC101744925
0	2.69508	0.572	0.189	0	Cuticle_3	LOC101736859
0	2.6837	0.169	0.001	0	Cuticle_3	LOC101743345
0	2.68153	0.342	0.003	0	Cuticle_3	LOC101746039
0	2.66618	0.195	0.008	0	Cuticle_3	CSP4
0	2.66482	0.565	0.043	0	Cuticle_3	LOC101736451
0	2.654	0.408	0.001	0	Cuticle_3	CPR84
0	2.64099	0.705	0.027	0	Cuticle_3	LOC101747074
0	2.61268	0.423	0.05	0	Cuticle_3	CPG14
0	2.60232	0.167	0.003	0	Cuticle_3	LOC778496
0	2.5822	0.523	0.068	0	Cuticle_3	Y-c
0	2.57203	0.791	0.309	0	Cuticle_3	LOC101740079
0	2.54492	0.624	0.005	0	Cuticle_3	LOC101745007
0	2.54258	0.888	0.616	0	Cuticle_3	LOC693081
0	2.54065	0.736	0.169	0	Cuticle_3	LOC101743955
0	2.53348	0.776	0.492	0	Cuticle_3	Hsp23.7
0	2.52633	0.189	0.01	0	Cuticle_3	LOC101739952
0	2.51846	0.49	0.016	0	Cuticle_3	CPG9
0	2.51442	0.986	0.902	0	Cuticle_3	Samui
0	2.51334	0.9	0.644	0	Cuticle_3	LOC732885
0	2.50912	0.62	0.057	0	Cuticle_3	LOC101743304
0	2.49523	0.701	0.084	0	Cuticle_3	LOC101746874
0	2.48051	0.529	0.026	0	Cuticle_3	LOC101740062
0	2.48015	0.438	0.003	0	Cuticle_3	LOC101737637
0	2.47302	0.608	0.11	0	Cuticle_3	LOC101745768
0	2.46434	0.867	0.284	0	Cuticle_3	Hr3
0	2.45364	0.458	0.083	0	Cuticle_3	CPH30
0	2.43184	0.644	0.006	0	Cuticle_3	LOC101746867
0	2.43154	0.79	0.301	0	Cuticle_3	LOC119629853
0	2.41136	0.784	0.259	0	Cuticle_3	LOC101742643
0	2.40888	0.473	0.021	0	Cuticle_3	LOC110385674
0	2.40473	1	0.999	0	Cuticle_3	Hsp90
0	2.39116	0.334	0.002	0	Cuticle_3	LOC101738590
0	2.36407	0.556	0.009	0	Cuticle_3	LOC101736535
0	2.35477	0.751	0.274	0	Cuticle_3	LOC101736080
0	2.34619	0.733	0.227	0	Cuticle_3	LOC101743327
0	2.30979	0.785	0.371	0	Cuticle_3	LOC101737750
0	2.29463	0.575	0.048	0	Cuticle_3	LOC101745063
0	2.27253	0.157	0.016	0	Cuticle_3	LOC101736553
0	2.26748	0.735	0.359	0	Cuticle_3	LOC101740145
0	2.25422	0.729	0.17	0	Cuticle_3	LOC101744574
0	2.2458	0.878	0.524	0	Cuticle_3	LOC101738787
0	2.22472	0.508	0.014	0	Cuticle_3	Lac2
0	2.20627	0.633	0.152	0	Cuticle_3	LOC105842064
0	2.17969	0.479	0.003	0	Cuticle_3	CPG12
0	2.17157	0.544	0.006	0	Cuticle_3	LOC101744689
0	2.1611	0.344	0.003	0	Cuticle_3	CPR129
0	2.1568	0.588	0.045	0	Cuticle_3	LOC101735908
0	2.13933	0.269	0.005	0	Cuticle_3	CPR57
0	2.12531	0.724	0.281	0	Cuticle_3	Hsp19.9
0	2.1153	0.902	0.69	0	Cuticle_3	LOC101741832
0	2.11142	0.638	0.06	0	Cuticle_3	LOC101740429
0	2.10641	0.695	0.157	0	Cuticle_3	LOC101738734
0	2.09083	0.844	0.514	0	Cuticle_3	LOC101735345
0	2.06916	0.709	0.207	0	Cuticle_3	LOC101739898
0	2.05436	0.774	0.437	0	Cuticle_3	LOC101746352
0	2.04651	0.671	0.181	0	Cuticle_3	LOC101743003
0	2.03687	0.375	0.016	0	Cuticle_3	LOC105841316
0	2.03582	0.409	0.011	0	Cuticle_3	LOC110386198
0	2.03263	0.471	0.004	0	Cuticle_3	LOC101736110
0	2.01273	0.638	0.113	0	Cuticle_3	LOC101737413
0	2.00557	0.348	0.001	0	Cuticle_3	CPR126
0	1.99174	0.532	0.032	0	Cuticle_3	LOC101747088
0	1.98736	0.606	0.045	0	Cuticle_3	LOC101737074
0	1.97404	0.662	0.128	0	Cuticle_3	LOC101735553
0	1.96605	0.79	0.514	0	Cuticle_3	LOC101740647
0	1.9641	0.7	0.174	0	Cuticle_3	LOC101738210
0	1.96334	0.631	0.24	0	Cuticle_3	LOC101744177
0	1.96178	0.438	0.024	0	Cuticle_3	LOC101741571
0	1.96046	0.545	0.059	0	Cuticle_3	LOC101743183
0	1.94215	0.744	0.351	0	Cuticle_3	LOC101745494
0	1.94191	0.642	0.143	0	Cuticle_3	LOC101743521
0	1.94089	0.433	0.006	0	Cuticle_3	LOC101740088
0	1.92675	0.597	0.065	0	Cuticle_3	LOC101736031
0	1.90536	0.531	0.027	0	Cuticle_3	LOC101737746
0	1.89881	0.77	0.389	0	Cuticle_3	LOC101739343
0	1.89475	0.615	0.109	0	Cuticle_3	LOC101740768
0	1.87872	0.468	0.062	0	Cuticle_3	CTL16
0	1.87475	0.249	0.005	0	Cuticle_3	LOC101745277
0	1.87469	0.523	0.02	0	Cuticle_3	CTL4
0	1.8709	0.53	0.082	0	Cuticle_3	LOC101743861
0	1.86388	0.742	0.311	0	Cuticle_3	LOC101743268
0	1.86034	0.589	0.085	0	Cuticle_3	LOC101746525
0	1.85973	0.508	0.029	0	Cuticle_3	CPH28
0	1.84384	0.459	0.046	0	Cuticle_3	LOC101738769
0	1.84323	0.697	0.23	0	Cuticle_3	LOC101735394
0	1.83943	0.557	0.168	0	Cuticle_3	LOC101739780
0	1.83523	0.537	0.127	0	Cuticle_3	LOC101743856
0	1.83427	0.565	0.059	0	Cuticle_3	Grf
0	1.8181	0.307	0.002	0	Cuticle_3	CPG3
0	1.7997	0.508	0.011	0	Cuticle_3	LOC105842034
0	1.79246	0.623	0.278	0	Cuticle_3	LOC101745799
0	1.792	0.99	0.98	0	Cuticle_3	LOC101736219
0	1.78949	0.497	0.01	0	Cuticle_3	LOC101739696
0	1.77129	0.698	0.346	0	Cuticle_3	LOC101740930
0	1.76446	0.447	0.006	0	Cuticle_3	LOC101738256
0	1.75631	0.556	0.139	0	Cuticle_3	LOC101738478
0	1.75418	0.458	0.003	0	Cuticle_3	LOC101738753
0	1.74676	0.434	0.086	0	Cuticle_3	LOC100862792
0	1.73512	0.467	0.004	0	Cuticle_3	LOC101738207
0	1.73001	0.466	0.012	0	Cuticle_3	LOC101740212
0	1.71579	0.219	0.011	0	Cuticle_3	CPR48
0	1.71354	0.456	0.058	0	Cuticle_3	LOC101737302
0	1.71086	0.499	0.002	0	Cuticle_3	LOC101740112
0	1.71053	0.723	0.318	0	Cuticle_3	LOC101745694
0	1.69667	0.331	0.005	0	Cuticle_3	CPR78
0	1.68031	0.555	0.13	0	Cuticle_3	LOC101742048
0	1.67336	0.499	0.009	0	Cuticle_3	LOC101744251
0	1.6721	0.344	0.006	0	Cuticle_3	LOC101737212
0	1.66867	0.536	0.172	0	Cuticle_3	LOC105842317
0	1.66298	0.467	0.074	0	Cuticle_3	LOC101741917
0	1.66241	0.467	0.126	0	Cuticle_3	LOC101744427
0	1.65888	0.797	0.446	0	Cuticle_3	LOC101744161
0	1.65652	0.505	0.026	0	Cuticle_3	LOC101745125
0	1.65171	0.487	0.056	0	Cuticle_3	LOC101737289
0	1.64846	0.62	0.256	0	Cuticle_3	LOC101746579
0	1.64548	0.289	0.007	0	Cuticle_3	LOC101745322
0	1.64539	0.271	0.011	0	Cuticle_3	LOC101739459
0	1.63452	0.654	0.233	0	Cuticle_3	LOC101743162
0	1.62274	0.47	0.076	0	Cuticle_3	LOC101738782
0	1.61861	0.531	0.169	0	Cuticle_3	LOC101736940
0	1.61771	0.785	0.534	0	Cuticle_3	LOC101741339
0	1.61604	0.403	0.035	0	Cuticle_3	LOC101738413
0	1.60206	0.815	0.516	0	Cuticle_3	LOC101741882
0	1.59488	0.523	0.11	0	Cuticle_3	LOC101742792
0	1.58373	0.373	0.049	0	Cuticle_3	CPH5
0	1.58231	0.631	0.313	0	Cuticle_3	LOC101746344
0	1.57362	0.369	0.057	0	Cuticle_3	LOC101743858
0	1.5618	0.762	0.493	0	Cuticle_3	LOC101743136
0	1.5533	0.442	0.021	0	Cuticle_3	LOC101742858
0	1.54871	0.459	0.125	0	Cuticle_3	LOC101739888
0	1.54794	0.546	0.116	0	Cuticle_3	LOC101745605
0	1.54616	0.414	0.068	0	Cuticle_3	LOC101740425
0	1.54501	0.524	0.133	0	Cuticle_3	LOC101737657
0	1.53387	0.395	0.006	0	Cuticle_3	LOC101737271
0	1.53288	0.469	0.011	0	Cuticle_3	LOC101736330
0	1.52682	0.409	0.046	0	Cuticle_3	LOC119628837
0	1.52366	0.734	0.466	0	Cuticle_3	LOC101739878
0	1.48742	0.384	0.059	0	Cuticle_3	LOC101747065
0	1.47903	0.528	0.139	0	Cuticle_3	LOC101736499
0	1.47898	0.731	0.606	0	Cuticle_3	LOC101737970
0	1.46734	0.457	0.072	0	Cuticle_3	LOC101744869
0	1.46581	0.407	0.033	0	Cuticle_3	LOC101737849
0	1.46563	0.799	0.716	0	Cuticle_3	LOC101738679
0	1.45161	0.45	0.073	0	Cuticle_3	LOC101745050
0	1.45029	0.666	0.349	0	Cuticle_3	LOC101741011
0	1.44775	0.552	0.263	0	Cuticle_3	LOC101743000
0	1.44344	0.534	0.207	0	Cuticle_3	LOC101744243
0	1.43768	0.37	0.122	0	Cuticle_3	LOC101740117
0	1.43288	0.606	0.237	0	Cuticle_3	LOC101744837
0	1.43037	0.483	0.108	0	Cuticle_3	LOC101741926
0	1.42827	0.425	0.1	0	Cuticle_3	Ebony
0	1.4273	0.41	0.01	0	Cuticle_3	LOC101740592
0	1.42223	0.684	0.434	0	Cuticle_3	LOC101738176
0	1.41089	0.444	0.018	0	Cuticle_3	Hsp20.8
0	1.41014	0.408	0.07	0	Cuticle_3	LOC101739682
0	1.40885	0.576	0.339	0	Cuticle_3	LOC101745489
0	1.40789	0.496	0.18	0	Cuticle_3	LOC105842530
0	1.40728	0.151	0.005	0	Cuticle_3	LOC101741964
0	1.40432	0.836	0.632	0	Cuticle_3	LOC101746048
0	1.40139	0.564	0.169	0	Cuticle_3	LOC101736086
0	1.39657	0.521	0.172	0	Cuticle_3	LOC101738416
0	1.39607	0.459	0.143	0	Cuticle_3	LOC101738751
0	1.39307	0.265	0.016	0	Cuticle_3	LOC101735804
0	1.39135	0.437	0.008	0	Cuticle_3	LOC101747013
0	1.38325	0.768	0.58	0	Cuticle_3	LOC100301978
0	1.37969	0.215	0.002	0	Cuticle_3	LOC119629360
0	1.37908	0.522	0.198	0	Cuticle_3	LOC101738291
0	1.3731	0.757	0.509	0	Cuticle_3	LOC101743155
0	1.37252	0.776	0.527	0	Cuticle_3	LOC101736977
0	1.36495	0.451	0.039	0	Cuticle_3	LOC101736241
0	1.36404	0.993	0.952	0	Cuticle_3	LOC110386217
0	1.35639	0.509	0.15	0	Cuticle_3	LOC105842505
0	1.35169	0.128	0.001	0	Cuticle_3	CPF
0	1.34818	0.36	0.003	0	Cuticle_3	LOC101745880
0	1.335	0.352	0.04	0	Cuticle_3	LOC101738019
0	1.33479	0.844	0.673	0	Cuticle_3	LOC119630575
0	1.33391	0.379	0.055	0	Cuticle_3	LOC119630503
0	1.33022	0.727	0.465	0	Cuticle_3	LOC101738882
0	1.32687	0.209	0.002	0	Cuticle_3	LOC101735659
0	1.31803	0.442	0.18	0	Cuticle_3	LOC101737050
0	1.31656	0.451	0.183	0	Cuticle_3	LOC101743132
0	1.31629	0.589	0.279	0	Cuticle_3	LOC101742433
0	1.31513	0.288	0.004	0	Cuticle_3	LOC101740736
0	1.31086	0.622	0.359	0	Cuticle_3	LOC101743185
0	1.30512	0.55	0.209	0	Cuticle_3	LOC101742585
0	1.30481	0.503	0.126	0	Cuticle_3	LOC101740924
0	1.30279	0.473	0.149	0	Cuticle_3	LOC101740597
0	1.29731	0.601	0.341	0	Cuticle_3	Rel
0	1.29646	0.456	0.084	0	Cuticle_3	LOC101737840
0	1.29429	0.531	0.211	0	Cuticle_3	LOC101741191
0	1.29302	0.331	0.021	0	Cuticle_3	LOC101738869
0	1.29286	0.363	0.029	0	Cuticle_3	LOC101738975
0	1.2919	0.557	0.224	0	Cuticle_3	LOC101745723
0	1.29067	0.573	0.305	0	Cuticle_3	LOC101738381
0	1.28808	0.581	0.3	0	Cuticle_3	LOC101737830
0	1.28549	0.541	0.288	0	Cuticle_3	LOC101743486
0	1.28452	0.83	0.757	0	Cuticle_3	CPH43
0	1.2815	0.167	0	0	Cuticle_3	LOC105841714
0	1.27929	0.446	0.055	0	Cuticle_3	LOC101746542
0	1.27787	0.737	0.579	0	Cuticle_3	Lpr
0	1.27509	0.525	0.22	0	Cuticle_3	LOC101740438
0	1.26972	0.547	0.302	0	Cuticle_3	LOC101740235
0	1.26565	0.276	0.06	0	Cuticle_3	LOC101736139
0	1.26458	0.4	0.045	0	Cuticle_3	LOC101744533
0	1.26205	0.672	0.469	0	Cuticle_3	LOC101747230
0	1.26092	0.299	0.055	0	Cuticle_3	LOC101741185
0	1.25604	0.816	0.549	0	Cuticle_3	LOC101741553
0	1.25424	0.465	0.174	0	Cuticle_3	LOC105842420
0	1.23577	0.414	0.05	0	Cuticle_3	LOC101739669
0	1.22985	0.318	0.005	0	Cuticle_3	CPR131
0	1.22412	0.806	0.688	0	Cuticle_3	LOC101737516
0	1.22339	0.482	0.154	0	Cuticle_3	LOC101741169
0	1.22117	0.825	0.621	0	Cuticle_3	LOC101740962
0	1.21875	0.315	0.028	0	Cuticle_3	LOC101742927
0	1.21701	0.551	0.245	0	Cuticle_3	LOC101742172
0	1.21393	0.481	0.208	0	Cuticle_3	LOC101744543
0	1.21283	0.373	0.026	0	Cuticle_3	LOC101735884
0	1.21267	0.342	0.006	0	Cuticle_3	LOC101744260
0	1.212	0.495	0.181	0	Cuticle_3	LOC101745239
0	1.21155	0.163	0.018	0	Cuticle_3	LOC101737140
0	1.21123	0.328	0.009	0	Cuticle_3	LOC105842602
0	1.20867	0.474	0.215	0	Cuticle_3	cact
0	1.20567	0.427	0.338	0	Cuticle_3	LOC101742781
0	1.19841	0.666	0.473	0	Cuticle_3	serpin-6
0	1.19423	0.778	0.578	0	Cuticle_3	LOC101740250
0	1.19195	0.664	0.497	0	Cuticle_3	LOC101739890
0	1.19021	0.341	0.018	0	Cuticle_3	LOC101738360
0	1.18983	0.401	0.04	0	Cuticle_3	LOC101744353
0	1.1845	0.531	0.418	0	Cuticle_3	LOC101738514
0	1.18246	0.646	0.349	0	Cuticle_3	LOC101745193
0	1.18206	0.128	0.001	0	Cuticle_3	LOC101741246
0	1.18117	0.347	0.075	0	Cuticle_3	LOC100302605
0	1.18036	0.415	0.134	0	Cuticle_3	LOC105841728
0	1.17985	0.621	0.395	0	Cuticle_3	LOC101739321
0	1.17632	0.209	0.041	0	Cuticle_3	LOC101735388
0	1.16838	0.26	0.002	0	Cuticle_3	CPR127
0	1.1663	0.284	0.025	0	Cuticle_3	LOC101735606
0	1.16418	0.179	0.002	0	Cuticle_3	LOC110385577
0	1.16052	0.384	0.061	0	Cuticle_3	LOC119628385
0	1.15823	0.36	0.041	0	Cuticle_3	LOC101740411
0	1.15692	0.174	0.012	0	Cuticle_3	CPT2
0	1.15424	0.343	0.032	0	Cuticle_3	LOC101740197
0	1.14969	0.275	0.01	0	Cuticle_3	LOC101746391
0	1.14696	0.292	0.084	0	Cuticle_3	LOC119630641
0	1.14021	0.351	0.039	0	Cuticle_3	LOC101742755
0	1.13396	0.417	0.136	0	Cuticle_3	LOC101739491
0	1.13342	0.511	0.232	0	Cuticle_3	LOC101738331
0	1.13101	0.336	0.024	0	Cuticle_3	LOC101744406
0	1.12971	0.445	0.154	0	Cuticle_3	LOC101743548
0	1.12945	0.327	0.005	0	Cuticle_3	LOC101744892
0	1.12296	0.167	0.004	0	Cuticle_3	CSP11
0	1.12161	0.285	0.002	0	Cuticle_3	LOC101735358
0	1.11916	0.87	0.883	0	Cuticle_3	LOC101745123
0	1.11802	0.536	0.298	0	Cuticle_3	cry2
0	1.11674	0.561	0.394	0	Cuticle_3	LOC119629762
0	1.11559	0.138	0.009	0	Cuticle_3	glv3
0	1.11514	0.555	0.399	0	Cuticle_3	LOC101743364
0	1.10683	0.507	0.284	0	Cuticle_3	LOC101745327
0	1.10644	0.627	0.524	0	Cuticle_3	LOC101740600
0	1.10289	0.421	0.102	0	Cuticle_3	LOC101741935
0	1.10183	0.35	0.171	0	Cuticle_3	ITP
0	1.09056	0.302	0.016	0	Cuticle_3	LOC110386639
0	1.08627	0.339	0.026	0	Cuticle_3	LOC101743453
0	1.08448	0.31	0.074	0	Cuticle_3	LOC101741240
0	1.08221	0.414	0.084	0	Cuticle_3	LOC101737222
0	1.08208	0.698	0.655	0	Cuticle_3	LOC101746557
0	1.07577	0.39	0.129	0	Cuticle_3	LOC101737038
0	1.07316	0.424	0.152	0	Cuticle_3	LOC101746553
0	1.07302	0.36	0.198	0	Cuticle_3	LOC101744777
0	1.07081	0.732	0.576	0	Cuticle_3	LOC101737452
0	1.06982	0.107	0.002	0	Cuticle_3	CPR71
0	1.06756	0.36	0.023	0	Cuticle_3	LOC101738748
0	1.06694	0.567	0.337	0	Cuticle_3	CPR56
0	1.06656	0.673	0.502	0	Cuticle_3	CKIalpha
0	1.06283	0.665	0.482	0	Cuticle_3	LOC101740354
0	1.05909	0.415	0.165	0	Cuticle_3	LOC101739468
0	1.05752	0.198	0.04	0	Cuticle_3	Lzm
0	1.05709	0.3	0.043	0	Cuticle_3	LOC105842714
0	1.05666	0.604	0.426	0	Cuticle_3	LOC101739193
0	1.05493	0.377	0.092	0	Cuticle_3	LOC101740157
0	1.05256	0.538	0.32	0	Cuticle_3	LOC101736665
0	1.05069	0.272	0.004	0	Cuticle_3	LOC101735700
0	1.05065	0.563	0.32	0	Cuticle_3	LOC101742880
0	1.04822	0.232	0.007	0	Cuticle_3	LOC101739502
0	1.04807	0.642	0.504	0	Cuticle_3	LOC101740818
0	1.04631	0.248	0.002	0	Cuticle_3	LOC101737744
0	1.04027	0.248	0.056	0	Cuticle_3	Leb3
0	1.03219	0.417	0.167	0	Cuticle_3	LOC101737427
0	1.03157	0.591	0.379	0	Cuticle_3	LOC101744991
0	1.03151	0.252	0.017	0	Cuticle_3	LOC101735353
0	1.03059	0.331	0.062	0	Cuticle_3	LOC101742038
0	1.02663	0.507	0.36	0	Cuticle_3	LOC101739752
0	1.02561	0.444	0.203	0	Cuticle_3	LOC101738820
0	1.02146	0.107	0.007	0	Cuticle_3	LOC101735393
0	1.01974	0.336	0.036	0	Cuticle_3	NGR-A25
0	1.01937	0.559	0.421	0	Cuticle_3	LOC101736534
0	1.01931	0.65	0.434	0	Cuticle_3	E74
0	1.01858	0.231	0.012	0	Cuticle_3	LOC101738864
0	1.01722	0.336	0.044	0	Cuticle_3	LOC101736279
0	1.01693	0.33	0.167	0	Cuticle_3	LOC101739337
0	1.01513	0.52	0.428	0	Cuticle_3	LOC101742616
0	1.01486	0.273	0.005	0	Cuticle_3	LOC105842146
0	1.01382	0.296	0.034	0	Cuticle_3	LOC101746958
0	1.01378	0.5	0.266	0	Cuticle_3	LOC101739889
0	1.01283	0.481	0.237	0	Cuticle_3	LOC101737097
0	1.01187	0.301	0.009	0	Cuticle_3	LOC101737333
0	1.01162	0.433	0.159	0	Cuticle_3	LOC101736541
0	1.0106	0.494	0.284	0	Cuticle_3	LOC101742009
0	1.0102	0.407	0.124	0	Cuticle_3	LOC101742418
0	1.00512	0.182	0.051	0	Cuticle_3	LOC119629127
0	1.00494	0.627	0.478	0	Cuticle_3	LOC101738805
0	0.998147	0.521	0.268	0	Cuticle_3	LOC101745387
0	0.995249	0.451	0.197	0	Cuticle_3	LOC101737202
0	0.994793	0.677	0.576	0	Cuticle_3	LOC692640
0	0.992135	0.447	0.208	0	Cuticle_3	LOC101746185
0	0.991041	0.318	0.032	0	Cuticle_3	LOC101743559
0	0.988455	0.331	0.099	0	Cuticle_3	LOC101746237
0	0.986332	0.526	0.281	0	Cuticle_3	LOC100884166
0	0.981116	0.369	0.077	0	Cuticle_3	LOC110385589
0	0.980251	0.27	0.049	0	Cuticle_3	LOC101735916
0	0.977478	0.309	0.002	0	Cuticle_3	LOC101736123
0	0.974659	0.436	0.232	0	Cuticle_3	LOC101744420
0	0.974532	0.225	0.073	0	Cuticle_3	LOC101737793
0	0.973346	0.118	0.001	0	Cuticle_3	CPR83
0	0.970698	0.739	0.659	0	Cuticle_3	LOC101745417
0	0.969818	0.426	0.176	0	Cuticle_3	LOC101744544
0	0.96902	0.276	0.058	0	Cuticle_3	LOC101743630
0	0.967439	0.424	0.22	0	Cuticle_3	LOC101745438
0	0.96612	0.228	0.022	0	Cuticle_3	CPR34
0	0.965477	0.794	0.731	0	Cuticle_3	CHD1
0	0.962928	0.711	0.605	0	Cuticle_3	LOC101735549
0	0.962811	0.371	0.123	0	Cuticle_3	LOC101738498
0	0.961812	0.143	0.013	0	Cuticle_3	Ethr
0	0.960771	0.676	0.516	0	Cuticle_3	ced-6
0	0.955205	0.135	0.05	0	Cuticle_3	glv4-like
0	0.951288	0.362	0.158	0	Cuticle_3	LOC101739933
0	0.951228	0.261	0.013	0	Cuticle_3	LOC101736996
0	0.949603	0.172	0.057	0	Cuticle_3	PGRP-S2
0	0.947563	0.418	0.19	0	Cuticle_3	LOC101746355
0	0.945399	0.371	0.122	0	Cuticle_3	LOC101740045
0	0.943423	0.275	0.005	0	Cuticle_3	LOC101742783
0	0.942254	0.687	0.523	0	Cuticle_3	LOC101738887
0	0.9377	0.488	0.29	0	Cuticle_3	LOC101739358
0	0.9374	0.534	0.31	0	Cuticle_3	LOC101741348
0	0.933946	0.7	0.542	0	Cuticle_3	LOC101740714
0	0.929996	0.55	0.383	0	Cuticle_3	LOC101745840
0	0.928383	0.686	0.561	0	Cuticle_3	Notch
0	0.928309	0.641	0.538	0	Cuticle_3	LOC101742695
0	0.926953	0.174	0.018	0	Cuticle_3	LOC101741952
0	0.926885	0.161	0.006	0	Cuticle_3	Catl-like
0	0.923832	0.465	0.239	0	Cuticle_3	oxr1
0	0.923763	0.535	0.351	0	Cuticle_3	LOC101739423
0	0.92251	0.271	0.037	0	Cuticle_3	LOC101738909
0	0.921293	0.393	0.167	0	Cuticle_3	LOC101741158
0	0.920853	0.472	0.264	0	Cuticle_3	GSTo2
0	0.920551	0.733	0.649	0	Cuticle_3	LOC101743989
0	0.918602	0.634	0.484	0	Cuticle_3	LOC101738783
0	0.917421	0.9	0.902	0	Cuticle_3	LOC101742452
0	0.916006	0.368	0.137	0	Cuticle_3	LOC101745169
0	0.915519	0.517	0.317	0	Cuticle_3	LOC101741077
0	0.914863	0.298	0.01	0	Cuticle_3	LOC105842052
0	0.91462	0.544	0.359	0	Cuticle_3	LOC101746345
0	0.913676	0.318	0.074	0	Cuticle_3	LOC101741356
0	0.912949	0.229	0.026	0	Cuticle_3	LOC101742839
0	0.911289	0.513	0.359	0	Cuticle_3	LOC101740916
0	0.910463	0.256	0.007	0	Cuticle_3	LOC101740410
0	0.904576	0.236	0.013	0	Cuticle_3	LOC101740413
0	0.90341	0.528	0.227	0	Cuticle_3	LOC101736212
0	0.899641	0.268	0.014	0	Cuticle_3	LOC101739725
0	0.899117	0.336	0.058	0	Cuticle_3	serpin-12
0	0.896412	0.333	0.084	0	Cuticle_3	ace1
0	0.894797	0.272	0.012	0	Cuticle_3	LOC101736450
0	0.890288	0.181	0.001	0	Cuticle_3	CPG15
0	0.889838	0.451	0.256	0	Cuticle_3	Ras2
0	0.889282	0.463	0.239	0	Cuticle_3	LOC101746977
0	0.888222	0.256	0.004	0	Cuticle_3	LOC101738273
0	0.887608	0.609	0.412	0	Cuticle_3	LOC101739353
0	0.885444	0.284	0.039	0	Cuticle_3	C/EBP
0	0.881182	0.161	0.007	0	Cuticle_3	LOC110386854
0	0.879886	0.58	0.462	0	Cuticle_3	LOC101746584
0	0.878166	0.187	0.041	0	Cuticle_3	LOC101742201
0	0.876025	0.25	0.012	0	Cuticle_3	LOC101746685
0	0.872777	0.372	0.19	0	Cuticle_3	LOC119630298
0	0.872177	0.438	0.221	0	Cuticle_3	LOC101744807
0	0.872071	0.332	0.094	0	Cuticle_3	LOC101738743
0	0.872002	0.483	0.318	0	Cuticle_3	LOC101738924
0	0.871501	0.549	0.375	0	Cuticle_3	LOC101745976
0	0.868643	0.414	0.22	0	Cuticle_3	LOC101743362
0	0.865684	0.225	0.096	0	Cuticle_3	LOC101746524
0	0.865076	0.37	0.119	0	Cuticle_3	LOC101742357
0	0.861122	0.481	0.295	0	Cuticle_3	LOC101742101
0	0.857521	0.732	0.693	0	Cuticle_3	LOC101735495
0	0.856688	0.371	0.139	0	Cuticle_3	LOC101738903
0	0.856117	0.276	0.097	0	Cuticle_3	LOC105841880
0	0.852993	0.29	0.082	0	Cuticle_3	LOC101742945
0	0.848908	0.458	0.28	0	Cuticle_3	LOC101746985
0	0.845689	0.251	0.008	0	Cuticle_3	LOC101740333
0	0.845057	0.435	0.23	0	Cuticle_3	LOC101740554
0	0.84493	0.125	0.003	0	Cuticle_3	LOC101736442
0	0.843285	0.485	0.389	0	Cuticle_3	LOC101743427
0	0.84242	0.439	0.256	0	Cuticle_3	LOC101745447
0	0.84177	0.373	0.26	0	Cuticle_3	LOC101744212
0	0.840959	0.382	0.197	0	Cuticle_3	LOC101740355
0	0.839964	0.67	0.579	0	Cuticle_3	LOC119629177
0	0.838771	0.353	0.145	0	Cuticle_3	LOC110386125
0	0.837826	0.501	0.306	0	Cuticle_3	LOC105842072
0	0.835959	0.536	0.404	0	Cuticle_3	LOC101739892
0	0.835925	0.486	0.358	0	Cuticle_3	LOC101742271
0	0.835922	0.298	0.039	0	Cuticle_3	LOC101740518
0	0.833538	0.285	0.029	0	Cuticle_3	LOC101741344
0	0.832939	0.613	0.59	0	Cuticle_3	LOC101742087
0	0.824155	0.421	0.193	0	Cuticle_3	LOC101738867
0	0.824103	0.303	0.053	0	Cuticle_3	LOC101746257
0	0.823538	0.46	0.347	0	Cuticle_3	LOC101741121
0	0.822097	0.278	0.033	0	Cuticle_3	LOC101737983
0	0.8214	0.576	0.252	0	Cuticle_3	LOC101740576
0	0.820909	0.241	0.049	0	Cuticle_3	LOC692675
0	0.819119	0.835	0.816	0	Cuticle_3	LOC101736835
0	0.816166	0.489	0.324	0	Cuticle_3	LOC101738793
0	0.815425	0.246	0.026	0	Cuticle_3	LOC101739936
0	0.815389	0.308	0.08	0	Cuticle_3	LOC101737884
0	0.813481	0.437	0.278	0	Cuticle_3	LOC101744503
0	0.813363	0.342	0.147	0	Cuticle_3	LOC101736446
0	0.811856	0.318	0.105	0	Cuticle_3	LOC101746443
0	0.810825	0.614	0.558	0	Cuticle_3	LOC101741518
0	0.810354	0.324	0.093	0	Cuticle_3	LOC101739716
0	0.810053	0.258	0.034	0	Cuticle_3	LOC101743430
0	0.804873	0.188	0.004	0	Cuticle_3	LOC101737982
0	0.802826	0.228	0.044	0	Cuticle_3	be2
0	0.80228	0.211	0.009	0	Cuticle_3	LOC101746073
0	0.801557	0.244	0.01	0	Cuticle_3	LOC101745090
0	0.794533	0.67	0.563	0	Cuticle_3	LOC101739809
0	0.793485	0.591	0.472	0	Cuticle_3	DnaJ-2
0	0.792978	0.287	0.069	0	Cuticle_3	LOC101742486
0	0.792552	0.267	0.02	0	Cuticle_3	LOC101741202
0	0.790599	0.25	0.005	0	Cuticle_3	LOC101739739
0	0.790219	0.486	0.29	0	Cuticle_3	LOC101737730
0	0.785372	0.373	0.173	0	Cuticle_3	LOC101744539
0	0.784832	0.386	0.188	0	Cuticle_3	LOC101745809
0	0.781179	0.54	0.441	0	Cuticle_3	LOC101743014
0	0.780881	0.261	0.046	0	Cuticle_3	LOC101740298
0	0.779242	0.239	0.007	0	Cuticle_3	LOC105842314
0	0.779194	0.144	0.045	0	Cuticle_3	LOC101745777
0	0.7785	0.741	0.695	0	Cuticle_3	Iap
0	0.777139	0.466	0.251	0	Cuticle_3	LOC101743303
0	0.776884	0.417	0.266	0	Cuticle_3	LOC101746759
0	0.775985	0.336	0.14	0	Cuticle_3	LOC101736175
0	0.775861	0.198	0.02	0	Cuticle_3	LOC101737569
0	0.773707	0.524	0.439	0	Cuticle_3	LOC101745195
0	0.773593	0.254	0.096	0	Cuticle_3	LOC101742362
0	0.771868	0.409	0.256	0	Cuticle_3	LOC101737287
0	0.766131	0.103	0.006	0	Cuticle_3	CPH18
0	0.764385	0.241	0.027	0	Cuticle_3	LOC101739255
0	0.764356	0.499	0.353	0	Cuticle_3	LOC101735441
0	0.758592	0.304	0.223	0	Cuticle_3	LOC119630965
0	0.754054	0.286	0.154	0	Cuticle_3	LOC101745248
0	0.75213	0.895	0.719	0	Cuticle_3	LOC101738178
0	0.750794	0.279	0.098	0	Cuticle_3	LOC101743621
0	0.748556	0.282	0.136	0	Cuticle_3	LOC105841642
0	0.746556	0.381	0.199	0	Cuticle_3	LOC101736699
0	0.745167	0.827	0.818	0	Cuticle_3	LOC101739346
0	0.743507	0.311	0.168	0	Cuticle_3	LOC101738757
0	0.742571	0.123	0	0	Cuticle_3	CPR81
0	0.742114	0.387	0.242	0	Cuticle_3	LOC101736259
0	0.741794	0.788	0.747	0	Cuticle_3	LOC101736630
0	0.741532	0.204	0.007	0	Cuticle_3	LOC101736552
0	0.741097	0.183	0.004	0	Cuticle_3	CPR72
0	0.741089	0.219	0.066	0	Cuticle_3	LOC101741218
0	0.739141	0.105	0.001	0	Cuticle_3	Y-y
0	0.739037	0.418	0.25	0	Cuticle_3	LOC101735524
0	0.738993	0.343	0.135	0	Cuticle_3	LOC101738133
0	0.738466	0.587	0.525	0	Cuticle_3	LOC101736823
0	0.737406	0.41	0.241	0	Cuticle_3	LOC101744049
0	0.737107	0.374	0.227	0	Cuticle_3	LOC101738292
0	0.73531	0.792	0.74	0	Cuticle_3	LOC101742811
0	0.735201	0.155	0.005	0	Cuticle_3	CPH33
0	0.733332	0.638	0.576	0	Cuticle_3	LOC101745688
0	0.730909	0.372	0.205	0	Cuticle_3	LOC101744992
0	0.729885	0.276	0.087	0	Cuticle_3	LOC101737535
0	0.729257	0.301	0.172	0	Cuticle_3	LOC101737761
0	0.728586	0.273	0.198	0	Cuticle_3	LOC101743724
0	0.728409	0.35	0.169	0	Cuticle_3	LOC101739734
0	0.727604	0.584	0.504	0	Cuticle_3	CDC2L1
0	0.725459	0.235	0.031	0	Cuticle_3	Th
0	0.723334	0.312	0.141	0	Cuticle_3	LOC693097
0	0.722929	0.525	0.406	0	Cuticle_3	LOC101744944
0	0.722621	0.347	0.151	0	Cuticle_3	LOC101743190
0	0.722157	0.217	0.005	0	Cuticle_3	LOC101737481
0	0.720092	0.239	0.04	0	Cuticle_3	LOC101741720
0	0.719511	0.243	0.025	0	Cuticle_3	LOC101744706
0	0.718481	0.456	0.359	0	Cuticle_3	BGRP2
0	0.716894	0.695	0.658	0	Cuticle_3	LOC101741025
0	0.716119	0.397	0.292	0	Cuticle_3	LOC101737224
0	0.711298	0.382	0.272	0	Cuticle_3	LOC105842562
0	0.709599	0.368	0.218	0	Cuticle_3	LOC101742619
0	0.708748	0.542	0.456	0	Cuticle_3	LOC101742601
0	0.705554	0.332	0.145	0	Cuticle_3	LOC101735366
0	0.704805	0.445	0.342	0	Cuticle_3	LOC732964
0	0.704373	0.522	0.415	0	Cuticle_3	LOC101736311
0	0.703313	0.263	0.048	0	Cuticle_3	LOC101742234
0	0.702307	0.422	0.255	0	Cuticle_3	LOC101747032
0	0.700867	0.304	0.256	0	Cuticle_3	LOC101745709
0	0.700662	0.411	0.35	0	Cuticle_3	LOC101744606
0	0.699085	0.166	0.005	0	Cuticle_3	LOC100188972
0	0.697239	0.382	0.236	0	Cuticle_3	LOC101736675
0	0.697066	0.518	0.43	0	Cuticle_3	LOC101743885
0	0.695892	0.193	0.101	0	Cuticle_3	LOC692643
0	0.695666	0.413	0.281	0	Cuticle_3	LOC101747087
0	0.69537	0.46	0.337	0	Cuticle_3	LOC101740457
0	0.695218	0.267	0.108	0	Cuticle_3	LOC693077
0	0.695211	0.569	0.457	0	Cuticle_3	LOC101741527
0	0.695147	0.432	0.336	0	Cuticle_3	LOC101743408
0	0.692974	0.443	0.351	0	Cuticle_3	LOC101745654
0	0.692449	0.333	0.17	0	Cuticle_3	LOC101736183
0	0.689654	0.272	0.059	0	Cuticle_3	LOC101744426
0	0.689205	0.223	0.053	0	Cuticle_3	LOC101745897
0	0.68828	0.293	0.09	0	Cuticle_3	LOC101744414
0	0.685418	0.485	0.375	0	Cuticle_3	LOC101746104
0	0.684848	0.405	0.268	0	Cuticle_3	LOC101736860
0	0.682087	0.369	0.219	0	Cuticle_3	LOC101745857
0	0.681807	0.301	0.118	0	Cuticle_3	LOC101746447
0	0.681717	0.55	0.468	0	Cuticle_3	LOC101745835
0	0.681299	0.493	0.366	0	Cuticle_3	LOC101746515
0	0.680329	0.417	0.302	0	Cuticle_3	LOC101743046
0	0.680043	0.382	0.264	0	Cuticle_3	LOC119629669
0	0.678449	0.328	0.166	0	Cuticle_3	LOC101740292
0	0.677207	0.22	0.067	0	Cuticle_3	LOC101744412
0	0.677091	0.331	0.162	0	Cuticle_3	LOC101736508
0	0.675514	0.307	0.152	0	Cuticle_3	LOC101741581
0	0.675167	0.647	0.63	0	Cuticle_3	LOC101742464
0	0.675026	0.224	0.008	0	Cuticle_3	LOC101746720
0	0.674263	0.176	0.014	0	Cuticle_3	LOC101740654
0	0.673891	0.112	0.02	0	Cuticle_3	CecD
0	0.671839	0.483	0.395	0	Cuticle_3	LOC101738211
0	0.671758	0.643	0.516	0	Cuticle_3	LOC101737461
0	0.671673	0.339	0.185	0	Cuticle_3	LOC101747132
0	0.67158	0.346	0.192	0	Cuticle_3	LOC101747001
0	0.670874	0.326	0.156	0	Cuticle_3	LOC101737777
0	0.670224	0.373	0.195	0	Cuticle_3	dapk
0	0.669572	0.365	0.205	0	Cuticle_3	LOC101739746
0	0.668956	0.38	0.233	0	Cuticle_3	LOC101739436
0	0.666188	0.142	0.012	0	Cuticle_3	LOC101741277
0	0.665932	0.241	0.069	0	Cuticle_3	LOC101743536
0	0.66525	0.289	0.143	0	Cuticle_3	LOC101741393
0	0.663113	0.461	0.372	0	Cuticle_3	LOC101736876
0	0.662631	0.329	0.185	0	Cuticle_3	LOC101740530
0	0.660182	0.347	0.196	0	Cuticle_3	LOC101746519
0	0.659579	0.217	0.008	0	Cuticle_3	LOC101744714
0	0.658784	0.462	0.348	0	Cuticle_3	LOC101739432
0	0.658278	0.409	0.265	0	Cuticle_3	LOC101740083
0	0.656146	0.402	0.324	0	Cuticle_3	LOC101737640
0	0.655929	0.367	0.225	0	Cuticle_3	LOC733007
0	0.654555	0.697	0.687	0	Cuticle_3	LOC101741532
0	0.652189	0.39	0.267	0	Cuticle_3	LOC101741786
0	0.651905	0.362	0.201	0	Cuticle_3	LOC101744675
0	0.650406	0.394	0.283	0	Cuticle_3	LOC101738660
0	0.649781	0.233	0.222	0	Cuticle_3	LOC692992
0	0.644698	0.554	0.501	0	Cuticle_3	LOC101738141
0	0.644069	0.682	0.593	0	Cuticle_3	LOC101739953
0	0.64266	0.177	0.058	0	Cuticle_3	LOC101746821
0	0.642614	0.462	0.373	0	Cuticle_3	LOC101740327
0	0.642583	0.446	0.29	0	Cuticle_3	LOC101743647
0	0.641904	0.179	0.075	0	Cuticle_3	LOC101736773
0	0.639828	0.486	0.402	0	Cuticle_3	LOC101743013
0	0.639743	0.176	0.007	0	Cuticle_3	LOC101737397
0	0.639674	0.308	0.158	0	Cuticle_3	LOC101736372
0	0.639003	0.428	0.309	0	Cuticle_3	LOC101738231
0	0.638627	0.309	0.142	0	Cuticle_3	LOC101737292
0	0.637694	0.186	0.046	0	Cuticle_3	LOC101741834
0	0.635123	0.191	0.03	0	Cuticle_3	LOC119629950
0	0.634566	0.491	0.404	0	Cuticle_3	DnaJ-12
0	0.634202	0.385	0.301	0	Cuticle_3	LOC101744072
0	0.633822	0.853	0.862	0	Cuticle_3	GSTd2
0	0.633618	0.304	0.123	0	Cuticle_3	LOC105841591
0	0.632762	0.393	0.292	0	Cuticle_3	LOC101740445
0	0.630945	0.146	0.098	0	Cuticle_3	Y-d
0	0.630403	0.377	0.265	0	Cuticle_3	LOC101736254
0	0.628121	0.518	0.461	0	Cuticle_3	LOC733061
0	0.626959	0.429	0.337	0	Cuticle_3	LOC101740446
0	0.626787	0.211	0.028	0	Cuticle_3	LOC119628914
0	0.625556	0.444	0.372	0	Cuticle_3	LOC101741177
0	0.624084	0.676	0.611	0	Cuticle_3	Fkbp13
0	0.624048	0.392	0.273	0	Cuticle_3	LOC101741058
0	0.62292	0.354	0.236	0	Cuticle_3	LOC101745385
0	0.622476	0.299	0.136	0	Cuticle_3	LOC101738965
0	0.621834	0.461	0.391	0	Cuticle_3	LOC101743537
0	0.620563	0.192	0.052	0	Cuticle_3	LOC119630261
0	0.61848	0.214	0.036	0	Cuticle_3	LOC101735698
0	0.617623	0.377	0.266	0	Cuticle_3	GSTo3
0	0.616799	0.336	0.196	0	Cuticle_3	LOC101741675
0	0.616283	0.301	0.102	0	Cuticle_3	Ftz-f1
0	0.616261	0.218	0.096	0	Cuticle_3	LOC101737542
0	0.615767	0.432	0.293	0	Cuticle_3	LOC101740011
0	0.61485	0.169	0.028	0	Cuticle_3	LOC101738672
0	0.613588	0.995	0.997	0	Cuticle_3	Hsc70-4
0	0.612692	0.539	0.481	0	Cuticle_3	LOC101738100
0	0.611453	0.401	0.311	0	Cuticle_3	LOC105841990
0	0.611241	0.355	0.214	0	Cuticle_3	LOC101738354
0	0.611015	0.45	0.331	0	Cuticle_3	LOC101738243
0	0.610617	0.249	0.076	0	Cuticle_3	LOC110384719
0	0.609946	0.266	0.114	0	Cuticle_3	LOC101739790
0	0.60988	0.444	0.34	0	Cuticle_3	LOC101742325
0	0.609867	0.444	0.351	0	Cuticle_3	LOC101742111
0	0.609646	0.293	0.152	0	Cuticle_3	CSP9
0	0.609514	0.235	0.096	0	Cuticle_3	LOC101743313
0	0.608835	0.282	0.138	0	Cuticle_3	LOC101737965
0	0.608691	0.195	0.058	0	Cuticle_3	LOC101745594
0	0.607964	0.324	0.188	0	Cuticle_3	LOC101739924
0	0.607706	0.536	0.475	0	Cuticle_3	LOC101745149
0	0.606718	0.384	0.235	0	Cuticle_3	LOC101739289
0	0.606482	0.336	0.202	0	Cuticle_3	LOC101739152
0	0.603461	0.213	0.08	0	Cuticle_3	IBP2
0	0.603385	0.543	0.539	0	Cuticle_3	LOC101735521
0	0.60326	0.311	0.172	0	Cuticle_3	LOC101742560
0	0.60315	0.225	0.121	0	Cuticle_3	Dsclp
0	0.602865	0.195	0.043	0	Cuticle_3	LOC101743348
0	0.602312	0.169	0.01	0	Cuticle_3	LOC105841453
0	0.601998	0.223	0.028	0	Cuticle_3	LOC101741517
0	0.601072	0.435	0.344	0	Cuticle_3	Khc
0	0.600353	0.178	0.059	0	Cuticle_3	LOC101742684
0	0.600183	0.493	0.39	0	Cuticle_3	LOC101740114
0	0.600043	0.466	0.414	0	Cuticle_3	LOC101742403
0	0.599266	0.346	0.219	0	Cuticle_3	LOC101742738
0	0.599258	0.405	0.257	0	Cuticle_3	LOC101747096
0	0.597482	0.531	0.441	0	Cuticle_3	LOC101737442
0	0.59733	0.275	0.109	0	Cuticle_3	LOC101742408
0	0.594495	0.124	0.003	0	Cuticle_3	LOC101744418
0	0.593689	0.501	0.447	0	Cuticle_3	LOC101738424
0	0.59281	0.235	0.082	0	Cuticle_3	gas2
0	0.591798	0.209	0.04	0	Cuticle_3	LOC101739483
0	0.591244	0.351	0.219	0	Cuticle_3	LOC101739652
0	0.591164	0.24	0.073	0	Cuticle_3	LOC101735915
0	0.589862	0.344	0.239	0	Cuticle_3	LOC101744080
0	0.589535	0.45	0.403	0	Cuticle_3	LOC101746800
0	0.588898	0.177	0.014	0	Cuticle_3	LOC101735785
0	0.588891	0.151	0.029	0	Cuticle_3	LOC101744445
0	0.587448	0.176	0.026	0	Cuticle_3	LOC101738086
0	0.585906	0.307	0.164	0	Cuticle_3	LOC101742002
0	0.585486	0.274	0.143	0	Cuticle_3	LOC101736540
0	0.584682	0.431	0.307	0	Cuticle_3	LOC101744686
0	0.584124	0.507	0.475	0	Cuticle_3	LOC101739324
0	0.583292	0.148	0.035	0	Cuticle_3	CPR79
0	0.583136	0.175	0.013	0	Cuticle_3	LOC101744617
0	0.582866	0.253	0.108	0	Cuticle_3	LOC101736246
0	0.582703	0.366	0.217	0	Cuticle_3	LOC101735585
0	0.582511	0.198	0.022	0	Cuticle_3	CYP49A1
0	0.582448	0.354	0.24	0	Cuticle_3	LOC101738557
0	0.578907	0.502	0.405	0	Cuticle_3	LOC101744329
0	0.578311	0.278	0.143	0	Cuticle_3	LOC101744557
0	0.575844	0.218	0.05	0	Cuticle_3	LOC101746908
0	0.575548	0.254	0.11	0	Cuticle_3	LOC101745646
0	0.574939	0.491	0.452	0	Cuticle_3	LOC101745336
0	0.574621	0.383	0.26	0	Cuticle_3	LOC101746703
0	0.57193	0.627	0.524	0	Cuticle_3	LOC100127100
0	0.571458	0.15	0.008	0	Cuticle_3	LOC101744859
0	0.570983	0.23	0.036	0	Cuticle_3	LOC101740121
0	0.570646	0.437	0.386	0	Cuticle_3	LOC101746074
0	0.568829	0.307	0.177	0	Cuticle_3	LOC101741435
0	0.568573	0.3	0.261	0	Cuticle_3	BmEts2
0	0.568066	0.384	0.322	0	Cuticle_3	LOC101741453
0	0.566789	0.182	0.053	0	Cuticle_3	LOC101745682
0	0.566072	0.187	0.03	0	Cuticle_3	LOC101737162
0	0.564536	0.274	0.149	0	Cuticle_3	LOC101735681
0	0.564244	0.55	0.496	0	Cuticle_3	LOC101742892
0	0.563465	0.345	0.233	0	Cuticle_3	LOC101738597
0	0.563222	0.246	0.134	0	Cuticle_3	LOC101736721
0	0.562879	0.471	0.403	0	Cuticle_3	LOC101745443
0	0.561524	0.481	0.344	0	Cuticle_3	LOC101735738
0	0.560267	0.183	0.006	0	Cuticle_3	LOC101747119
0	0.559935	0.364	0.311	0	Cuticle_3	LOC101747041
0	0.559038	0.42	0.322	0	Cuticle_3	LOC101736498
0	0.557637	0.124	0.004	0	Cuticle_3	LOC105842185
0	0.557554	0.208	0.035	0	Cuticle_3	LOC101738235
0	0.556556	0.455	0.408	0	Cuticle_3	LOC692981
0	0.556302	0.634	0.612	0	Cuticle_3	LOC101735474
0	0.555438	0.361	0.234	0	Cuticle_3	LOC101737792
0	0.554979	0.334	0.244	0	Cuticle_3	LOC101743826
0	0.554939	0.184	0.028	0	Cuticle_3	LOC101744511
0	0.554894	0.253	0.105	0	Cuticle_3	LOC101741433
0	0.552846	0.318	0.222	0	Cuticle_3	LOC101736697
0	0.551844	0.182	0.145	0	Cuticle_3	LOC101744451
0	0.551767	0.313	0.203	0	Cuticle_3	LOC101747187
0	0.549052	0.132	0	0	Cuticle_3	CPR86
0	0.549002	0.309	0.201	0	Cuticle_3	LOC101735970
0	0.548513	0.211	0.05	0	Cuticle_3	LOC101741494
0	0.548416	0.889	0.923	0	Cuticle_3	LOC101742698
0	0.545339	0.333	0.233	0	Cuticle_3	LOC101736572
0	0.545095	0.141	0.02	0	Cuticle_3	LOC101741878
0	0.54263	0.13	0.001	0	Cuticle_3	LOC101741295
0	0.54134	0.252	0.149	0	Cuticle_3	LOC101744958
0	0.539372	0.31	0.214	0	Cuticle_3	LOC101742517
0	0.536122	0.285	0.161	0	Cuticle_3	LOC101746728
0	0.534121	0.177	0.042	0	Cuticle_3	LOC101744951
0	0.533306	0.411	0.337	0	Cuticle_3	LOC101738442
0	0.533208	0.172	0.008	0	Cuticle_3	LOC101737216
0	0.532538	0.473	0.417	0	Cuticle_3	LOC101740771
0	0.531972	0.132	0.004	0	Cuticle_3	LOC101737905
0	0.529915	0.235	0.115	0	Cuticle_3	LOC101740732
0	0.529764	0.115	0.026	0	Cuticle_3	LOC101735954
0	0.529681	0.312	0.208	0	Cuticle_3	Ahsa1
0	0.529046	0.14	0.009	0	Cuticle_3	yellow-12
0	0.528193	0.294	0.167	0	Cuticle_3	LOC101735855
0	0.52773	0.423	0.405	0	Cuticle_3	LOC101743700
0	0.527358	0.174	0.045	0	Cuticle_3	LOC101741429
0	0.52711	0.146	0.033	0	Cuticle_3	LOC119631094
0	0.526582	0.707	0.721	0	Cuticle_3	LOC101739548
0	0.526484	0.218	0.092	0	Cuticle_3	LOC101743842
0	0.525772	0.386	0.261	0	Cuticle_3	LOC101742095
0	0.525518	0.364	0.255	0	Cuticle_3	LOC101744657
0	0.524032	0.291	0.148	0	Cuticle_3	LOC101745631
0	0.523156	0.169	0.046	0	Cuticle_3	LOC101737969
0	0.521897	0.432	0.352	0	Cuticle_3	LOC101739329
0	0.521765	0.205	0.083	0	Cuticle_3	LOC101743051
0	0.521025	0.262	0.145	0	Cuticle_3	LOC101737410
0	0.519365	0.436	0.381	0	Cuticle_3	LOC101737400
0	0.519317	0.179	0.037	0	Cuticle_3	LOC101742594
0	0.51826	0.102	0.003	0	Cuticle_3	LOC101742092
0	0.518066	0.281	0.227	0	Cuticle_3	LOC101735359
0	0.518028	0.186	0.031	0	Cuticle_3	LOC101741035
0	0.51802	0.267	0.154	0	Cuticle_3	LOC101743534
0	0.517803	0.217	0.075	0	Cuticle_3	LOC101746419
0	0.516449	0.222	0.087	0	Cuticle_3	LOC105842988
0	0.51609	0.427	0.349	0	Cuticle_3	LOC101740393
0	0.51527	0.318	0.202	0	Cuticle_3	LOC101737198
0	0.515261	0.327	0.239	0	Cuticle_3	LOC101738570
0	0.514727	0.238	0.129	0	Cuticle_3	LOC100302603
0	0.513647	0.179	0.114	0	Cuticle_3	LOC101739950
0	0.512524	0.449	0.383	0	Cuticle_3	LOC101747111
0	0.512076	0.19	0.053	0	Cuticle_3	LOC101742014
0	0.511868	0.607	0.582	0	Cuticle_3	LOC101742570
0	0.511778	0.126	0.055	0	Cuticle_3	NGR-A35
0	0.511601	0.611	0.641	0	Cuticle_3	LOC101735981
0	0.511313	0.323	0.244	0	Cuticle_3	LOC101738338
0	0.510891	0.162	0.055	0	Cuticle_3	LOC119630877
0	0.50972	0.407	0.367	0	Cuticle_3	LOC101742122
0	0.509194	0.31	0.205	0	Cuticle_3	LOC101741056
0	0.508776	0.472	0.478	0	Cuticle_3	LOC101737405
0	0.507901	0.395	0.332	0	Cuticle_3	LOC101738788
0	0.507665	0.348	0.279	0	Cuticle_3	DnaJ-21
0	0.507249	0.303	0.182	0	Cuticle_3	LOC101744139
0	0.505694	0.517	0.53	0	Cuticle_3	LOC100127128
0	0.504817	0.428	0.348	0	Cuticle_3	Snf4agamma
0	0.503429	0.519	0.471	0	Cuticle_3	LOC101736848
0	0.503377	0.556	0.571	0	Cuticle_3	LOC732944
0	0.5022	0.304	0.186	0	Cuticle_3	LOC101741223
0	0.501848	0.392	0.321	0	Cuticle_3	LOC101743077
0	0.501116	0.442	0.426	0	Cuticle_3	LOC101736214
0	0.499938	0.371	0.55	0	Cuticle_3	LOC101741441
0	0.499761	0.606	0.614	0	Cuticle_3	LOC101745404
0	0.499295	0.336	0.236	0	Cuticle_3	LOC101737722
0	0.498944	0.164	0.008	0	Cuticle_3	LOC101741272
0	0.498232	0.502	0.457	0	Cuticle_3	LOC101740081
0	0.497958	0.144	0.034	0	Cuticle_3	LOC101744744
0	0.497686	0.31	0.211	0	Cuticle_3	LOC101739984
0	0.497469	0.528	0.517	0	Cuticle_3	LOC101746836
0	0.496436	0.624	0.632	0	Cuticle_3	LOC101742456
0	0.495256	0.162	0.061	0	Cuticle_3	LOC105841416
0	0.494765	0.152	0.002	0	Cuticle_3	LOC101740242
0	0.49358	0.315	0.218	0	Cuticle_3	LOC101741683
0	0.493523	0.44	0.385	0	Cuticle_3	LOC101740495
0	0.493515	0.335	0.257	0	Cuticle_3	LOC101737520
0	0.493411	0.26	0.158	0	Cuticle_3	LOC778507
0	0.493176	0.425	0.399	0	Cuticle_3	LOC101744697
0	0.492903	0.162	0.009	0	Cuticle_3	jhe1
0	0.492686	0.101	0.004	0	Cuticle_3	LOC101743266
0	0.492569	0.208	0.09	0	Cuticle_3	LOC101736692
0	0.491945	0.126	0.04	0	Cuticle_3	LOC101746370
0	0.490968	0.219	0.104	0	Cuticle_3	LOC101739674
0	0.490918	0.3	0.21	0	Cuticle_3	LOC101746517
0	0.490361	0.222	0.119	0	Cuticle_3	LOC119631034
0	0.489195	0.27	0.136	0	Cuticle_3	LOC101742466
0	0.488932	0.332	0.24	0	Cuticle_3	LOC101740182
0	0.488883	0.138	0.014	0	Cuticle_3	LOC101741297
0	0.488216	0.132	0.005	0	Cuticle_3	LOC101745023
0	0.487368	0.235	0.13	0	Cuticle_3	LOC101736826
0	0.486112	0.112	0.002	0	Cuticle_3	LOC101744722
0	0.485841	0.263	0.157	0	Cuticle_3	LOC101736144
0	0.485122	0.575	0.595	0	Cuticle_3	Uqcr11
0	0.483891	0.235	0.123	0	Cuticle_3	LOC101746781
0	0.483609	0.661	0.651	0	Cuticle_3	LOC101745746
0	0.48283	0.286	0.193	0	Cuticle_3	LOC101735808
0	0.482178	0.145	0.001	0	Cuticle_3	Hsp20.4
0	0.480954	0.501	0.392	0	Cuticle_3	LOC101739163
0	0.48036	0.277	0.224	0	Cuticle_3	LOC101743746
0	0.480108	0.248	0.122	0	Cuticle_3	LOC101745720
0	0.479652	0.219	0.103	0	Cuticle_3	LOC101741842
0	0.479397	0.398	0.338	0	Cuticle_3	LOC101738795
0	0.478661	0.324	0.246	0	Cuticle_3	LOC101746598
0	0.477683	0.259	0.13	0	Cuticle_3	LOC101741271
0	0.476679	0.161	0.002	0	Cuticle_3	LOC110385080
0	0.476437	0.324	0.212	0	Cuticle_3	LOC101745512
0	0.476155	0.158	0.064	0	Cuticle_3	LOC101745361
0	0.47588	0.381	0.292	0	Cuticle_3	LOC101740014
0	0.474787	0.33	0.243	0	Cuticle_3	LOC101746338
0	0.473645	0.266	0.181	0	Cuticle_3	LOC101743653
0	0.473017	0.256	0.158	0	Cuticle_3	LOC105842357
0	0.47263	0.27	0.165	0	Cuticle_3	LOC101739969
0	0.471727	0.248	0.159	0	Cuticle_3	LOC101737719
0	0.471266	0.287	0.196	0	Cuticle_3	LOC101740431
0	0.468866	0.484	0.481	0	Cuticle_3	LOC692872
0	0.468754	0.207	0.067	0	Cuticle_3	LOC101743016
0	0.467993	0.229	0.105	0	Cuticle_3	LOC101739124
0	0.467312	0.293	0.187	0	Cuticle_3	LOC101740688
0	0.466943	0.569	0.562	0	Cuticle_3	LOC101737821
0	0.466743	0.112	0.001	0	Cuticle_3	LOC101741824
0	0.465446	0.508	0.336	0	Cuticle_3	LOC101745698
0	0.46486	0.312	0.207	0	Cuticle_3	LOC101740041
0	0.464748	0.327	0.258	0	Cuticle_3	LOC101736672
0	0.464632	0.107	0.029	0	Cuticle_3	LOC101740626
0	0.464117	0.397	0.373	0	Cuticle_3	LOC101735648
0	0.463182	0.223	0.117	0	Cuticle_3	LOC101744881
0	0.463012	0.448	0.451	0	Cuticle_3	LOC101745482
0	0.462659	0.418	0.426	0	Cuticle_3	LOC101742563
0	0.461734	0.505	0.483	0	Cuticle_3	LOC101744068
0	0.461375	0.375	0.311	0	Cuticle_3	LOC101745220
0	0.461294	0.329	0.256	0	Cuticle_3	LOC101736526
0	0.460516	0.228	0.104	0	Cuticle_3	Hmg-r
0	0.460397	0.161	0.034	0	Cuticle_3	LOC101737575
0	0.460206	0.167	0.021	0	Cuticle_3	LOC101745218
0	0.460131	0.206	0.078	0	Cuticle_3	LOC119628836
0	0.459987	0.41	0.333	0	Cuticle_3	LOC101744019
0	0.459438	0.313	0.219	0	Cuticle_3	LOC101740141
0	0.458022	0.157	0.034	0	Cuticle_3	LOC101739339
0	0.457982	0.372	0.33	0	Cuticle_3	LOC101741422
0	0.456862	0.336	0.26	0	Cuticle_3	PHO
0	0.453994	0.367	0.33	0	Cuticle_3	LOC101738344
0	0.453093	0.285	0.205	0	Cuticle_3	LOC101738990
0	0.452707	0.343	0.327	0	Cuticle_3	LOC101746214
0	0.451718	0.13	0.002	0	Cuticle_3	LOC101736369
0	0.450736	0.479	0.444	0	Cuticle_3	LOC101741684
0	0.450016	0.528	0.549	0	Cuticle_3	LOC693102
0	0.449907	0.13	0.006	0	Cuticle_3	LOC101746552
0	0.449173	0.299	0.222	0	Cuticle_3	LOC101743503
0	0.449025	0.514	0.523	0	Cuticle_3	LOC101735727
0	0.448935	0.119	0.013	0	Cuticle_3	LOC101736889
0	0.448521	0.202	0.093	0	Cuticle_3	LOC101743956
0	0.447559	0.149	0.02	0	Cuticle_3	LOC101736150
0	0.447467	0.355	0.338	0	Cuticle_3	LOC101744395
0	0.44654	0.261	0.195	0	Cuticle_3	LOC101744669
0	0.445843	0.143	0.031	0	Cuticle_3	LOC101743655
0	0.445696	0.347	0.271	0	Cuticle_3	LOC101736543
0	0.445414	0.179	0.061	0	Cuticle_3	LOC101739854
0	0.444435	0.221	0.116	0	Cuticle_3	LOC101740401
0	0.443657	0.152	0.048	0	Cuticle_3	LOC101740043
0	0.443459	0.278	0.197	0	Cuticle_3	LOC101740758
0	0.443438	0.138	0.062	0	Cuticle_3	LOC101744704
0	0.443326	0.319	0.259	0	Cuticle_3	LOC101743159
0	0.442303	0.295	0.199	0	Cuticle_3	LOC101739829
0	0.441664	0.511	0.516	0	Cuticle_3	LOC101740276
0	0.441111	0.143	0	0	Cuticle_3	LOC119630759
0	0.440778	0.208	0.087	0	Cuticle_3	LOC105841262
0	0.440757	0.286	0.227	0	Cuticle_3	LOC101739625
0	0.44002	0.322	0.262	0	Cuticle_3	LOC101743091
0	0.439858	0.134	0.032	0	Cuticle_3	LOC101745197
0	0.439101	0.19	0.109	0	Cuticle_3	LOC101746387
0	0.438356	0.548	0.584	0	Cuticle_3	LOC101737590
0	0.438283	0.204	0.092	0	Cuticle_3	LOC101743480
0	0.438192	0.317	0.249	0	Cuticle_3	LOC101739920
0	0.437893	0.251	0.145	0	Cuticle_3	LOC101741591
0	0.437047	0.291	0.212	0	Cuticle_3	LOC101745573
0	0.437046	0.175	0.105	0	Cuticle_3	LOC101743693
0	0.436805	0.234	0.157	0	Cuticle_3	LOC101736872
0	0.436534	0.132	0.019	0	Cuticle_3	LOC105843010
0	0.436147	0.222	0.106	0	Cuticle_3	LOC101736036
0	0.436113	0.242	0.134	0	Cuticle_3	LOC101746590
0	0.435875	0.166	0.058	0	Cuticle_3	LOC101735429
0	0.43466	0.325	0.276	0	Cuticle_3	LOC101736992
0	0.434517	0.117	0.017	0	Cuticle_3	LOC101735421
0	0.433953	0.153	0.019	0	Cuticle_3	LOC101739813
0	0.433853	0.128	0.017	0	Cuticle_3	LOC101738792
0	0.433716	0.473	0.475	0	Cuticle_3	LOC733057
0	0.433105	0.179	0.064	0	Cuticle_3	LOC101739002
0	0.433014	0.272	0.184	0	Cuticle_3	LOC692861
0	0.432021	0.526	0.54	0	Cuticle_3	LOC101739559
0	0.4318	0.145	0.048	0	Cuticle_3	LOC101746180
0	0.431432	0.633	0.518	0	Cuticle_3	LOC101747091
0	0.431231	0.115	0.041	0	Cuticle_3	LOC101738846
0	0.429895	0.141	0.011	0	Cuticle_3	LOC101740752
0	0.42966	0.21	0.08	0	Cuticle_3	LOC101746634
0	0.428239	0.298	0.198	0	Cuticle_3	LOC101739312
0	0.427818	0.242	0.159	0	Cuticle_3	LOC101737189
0	0.427596	0.17	0.055	0	Cuticle_3	LOC101741765
0	0.427355	0.133	0.034	0	Cuticle_3	LOC101736422
0	0.426521	0.519	0.535	0	Cuticle_3	LOC101735807
0	0.425996	0.155	0.063	0	Cuticle_3	LOC105842471
0	0.425542	0.328	0.296	0	Cuticle_3	LOC100529236
0	0.425433	0.178	0.054	0	Cuticle_3	LOC101740465
0	0.424634	0.332	0.294	0	Cuticle_3	LOC101742090
0	0.423039	0.411	0.399	0	Cuticle_3	LOC101736557
0	0.422498	0.293	0.22	0	Cuticle_3	LOC101746025
0	0.422284	0.104	0.026	0	Cuticle_3	LOC105842037
0	0.422247	0.423	0.433	0	Cuticle_3	LOC101743278
0	0.421808	0.136	0.011	0	Cuticle_3	LOC101737885
0	0.421319	0.297	0.231	0	Cuticle_3	LOC732901
0	0.420752	0.214	0.102	0	Cuticle_3	LOC101746182
0	0.420323	0.18	0.051	0	Cuticle_3	LOC105841683
0	0.419397	0.149	0.024	0	Cuticle_3	LOC101739175
0	0.41936	0.136	0.011	0	Cuticle_3	LOC119628832
0	0.418208	0.307	0.232	0	Cuticle_3	LOC101736893
0	0.41752	0.191	0.091	0	Cuticle_3	LOC101745930
0	0.417433	0.198	0.076	0	Cuticle_3	LOC101741241
0	0.417394	0.295	0.244	0	Cuticle_3	LOC101737780
0	0.417211	0.35	0.327	0	Cuticle_3	LOC101736724
0	0.41698	0.162	0.028	0	Cuticle_3	LOC101745785
0	0.416349	0.236	0.163	0	Cuticle_3	LOC101735765
0	0.416284	0.129	0.001	0	Cuticle_3	cce-6
0	0.415445	0.24	0.149	0	Cuticle_3	LOC101745706
0	0.415411	0.196	0.164	0	Cuticle_3	LOC101739963
0	0.414674	0.141	0.003	0	Cuticle_3	LOC101746801
0	0.414612	0.31	0.257	0	Cuticle_3	LOC101735998
0	0.414465	0.257	0.192	0	Cuticle_3	LOC101745832
0	0.414245	0.124	0.022	0	Cuticle_3	LOC101737432
0	0.41331	0.205	0.096	0	Cuticle_3	LOC101736729
0	0.413238	0.103	0.005	0	Cuticle_3	LOC101735602
0	0.413089	0.373	0.346	0	Cuticle_3	LOC101737367
0	0.412984	0.391	0.35	0	Cuticle_3	LOC101741298
0	0.412978	0.224	0.115	0	Cuticle_3	LOC101737508
0	0.412642	0.337	0.264	0	Cuticle_3	LOC101739693
0	0.41228	0.288	0.233	0	Cuticle_3	LOC101738272
0	0.412263	0.421	0.42	0	Cuticle_3	LOC101741736
0	0.412194	0.1	0.007	0	Cuticle_3	LOC101739417
0	0.411895	0.389	0.348	0	Cuticle_3	LOC101742265
0	0.411865	0.288	0.211	0	Cuticle_3	LOC101740855
0	0.410922	0.258	0.2	0	Cuticle_3	LOC101736479
0	0.410661	0.337	0.305	0	Cuticle_3	LOC101738259
0	0.410516	0.129	0.01	0	Cuticle_3	LOC101739648
0	0.409866	0.254	0.156	0	Cuticle_3	LOC101744779
0	0.409139	0.313	0.268	0	Cuticle_3	LOC101740023
0	0.40869	0.191	0.074	0	Cuticle_3	LOC101736604
0	0.408522	0.144	0.028	0	Cuticle_3	LOC101746293
0	0.408403	0.135	0.04	0	Cuticle_3	LOC105841549
0	0.407961	0.656	0.702	0	Cuticle_3	LOC101741265
0	0.407747	0.427	0.433	0	Cuticle_3	LOC732972
0	0.407481	0.453	0.424	0	Cuticle_3	LOC100134918
0	0.407271	0.127	0.009	0	Cuticle_3	LOC101740602
0	0.406927	0.542	0.525	0	Cuticle_3	LOC101737313
0	0.406621	0.314	0.263	0	Cuticle_3	LOC101743721
0	0.406379	0.142	0.044	0	Cuticle_3	LOC101736353
0	0.406114	0.155	0.048	0	Cuticle_3	LOC101744252
0	0.405509	0.351	0.342	0	Cuticle_3	LOC693087
0	0.405388	0.472	0.48	0	Cuticle_3	LOC101745094
0	0.404354	0.216	0.111	0	Cuticle_3	LOC101736493
0	0.404168	0.211	0.122	0	Cuticle_3	LOC101745425
0	0.403124	0.234	0.193	0	Cuticle_3	LOC101736238
0	0.402392	0.831	0.838	0	Cuticle_3	LOC101736421
0	0.401576	0.132	0.013	0	Cuticle_3	UGT50A1
0	0.401498	0.273	0.191	0	Cuticle_3	LOC101743037
0	0.401246	0.172	0.065	0	Cuticle_3	LOC101742721
0	0.40073	0.178	0.076	0	Cuticle_3	LOC101741758
0	0.400585	0.2	0.089	0	Cuticle_3	LOC101738320
0	0.400576	0.6	0.609	0	Cuticle_3	serpin-3
0	0.400073	0.182	0.079	0	Cuticle_3	LOC101739084
0	0.39969	0.326	0.303	0	Cuticle_3	LOC101743010
0	0.399649	0.334	0.305	0	Cuticle_3	LOC101738779
0	0.399514	0.37	0.363	0	Cuticle_3	LOC101738143
0	0.397781	0.505	0.523	0	Cuticle_3	LOC101735385
0	0.397579	0.11	0.039	0	Cuticle_3	LOC101740692
0	0.397414	0.669	0.679	0	Cuticle_3	LOC100101209
0	0.39672	0.103	0.003	0	Cuticle_3	LOC101744633
0	0.39607	0.599	0.637	0	Cuticle_3	LOC101742454
0	0.395572	0.416	0.437	0	Cuticle_3	LOC101746096
0	0.394505	0.228	0.138	0	Cuticle_3	LOC101744425
0	0.394159	0.265	0.22	0	Cuticle_3	LOC101745471
0	0.392307	0.383	0.351	0	Cuticle_3	LOC101743209
0	0.391325	0.651	0.668	0	Cuticle_3	LOC733143
0	0.390794	0.269	0.225	0	Cuticle_3	LOC119630811
0	0.390345	0.339	0.317	0	Cuticle_3	LOC101736303
0	0.390196	0.236	0.164	0	Cuticle_3	LOC101747121
0	0.388839	0.521	0.548	0	Cuticle_3	Hop
0	0.38754	0.229	0.141	0	Cuticle_3	LOC101737811
0	0.386877	0.248	0.195	0	Cuticle_3	LOC101741692
0	0.386113	0.564	0.606	0	Cuticle_3	LOC100271899
0	0.385997	0.174	0.066	0	Cuticle_3	LOC119631230
0	0.385396	0.376	0.381	0	Cuticle_3	Cdc37
0	0.385022	0.188	0.088	0	Cuticle_3	LOC105842320
0	0.384733	0.402	0.46	0	Cuticle_3	LOC110385370
0	0.383835	0.196	0.12	0	Cuticle_3	LOC101744231
0	0.38373	0.309	0.296	0	Cuticle_3	LOC101739750
0	0.383482	0.71	0.768	0	Cuticle_3	LOC101738175
0	0.382434	0.279	0.273	0	Cuticle_3	LOC101736752
0	0.382421	0.278	0.234	0	Cuticle_3	LOC101738345
0	0.381427	0.127	0.003	0	Cuticle_3	LOC105842244
0	0.380984	0.128	0.006	0	Cuticle_3	LOC101744403
0	0.380415	0.134	0.063	0	Cuticle_3	LOC101743882
0	0.38022	0.185	0.08	0	Cuticle_3	LOC101735592
0	0.377222	0.271	0.22	0	Cuticle_3	LOC101746539
0	0.37721	0.246	0.186	0	Cuticle_3	LOC101745763
0	0.376258	0.285	0.242	0	Cuticle_3	LOC101737428
0	0.37615	0.219	0.144	0	Cuticle_3	SDR39U1
0	0.375892	0.109	0.003	0	Cuticle_3	LOC101742070
0	0.375665	0.225	0.143	0	Cuticle_3	LOC101737457
0	0.37404	0.229	0.158	0	Cuticle_3	LOC101742293
0	0.373791	0.32	0.306	0	Cuticle_3	LOC101739429
0	0.372489	0.378	0.362	0	Cuticle_3	LOC101742459
0	0.371314	0.275	0.231	0	Cuticle_3	LOC101739240
0	0.371161	0.594	0.595	0	Cuticle_3	LOC101737357
0	0.370957	0.104	0.017	0	Cuticle_3	LOC101746514
0	0.370566	0.232	0.093	0	Cuticle_3	LOC105842272
0	0.370388	0.271	0.215	0	Cuticle_3	LOC767623
0	0.369061	0.11	0.026	0	Cuticle_3	LOC101737606
0	0.368373	0.144	0.049	0	Cuticle_3	LOC101737414
0	0.368327	0.273	0.234	0	Cuticle_3	LOC101735312
0	0.367812	0.13	0.015	0	Cuticle_3	LOC101741681
0	0.366932	0.501	0.498	0	Cuticle_3	LOC101746298
0	0.365175	0.146	0.053	0	Cuticle_3	LOC101744467
0	0.364823	0.101	0.029	0	Cuticle_3	LOC101741923
0	0.364194	0.269	0.218	0	Cuticle_3	LOC101743467
0	0.363933	0.44	0.461	0	Cuticle_3	LOC101746556
0	0.363864	0.125	0.027	0	Cuticle_3	LOC101738218
0	0.363393	0.546	0.555	0	Cuticle_3	LOC101744024
0	0.363345	0.468	0.533	0	Cuticle_3	LOC101737787
0	0.358626	0.804	0.834	0	Cuticle_3	LOC778526
0	0.358512	0.537	0.527	0	Cuticle_3	Gro
0	0.357822	0.474	0.532	0	Cuticle_3	LOC101741135
0	0.35639	0.209	0.148	0	Cuticle_3	LOC101739148
0	0.356229	0.187	0.096	0	Cuticle_3	LOC101745412
0	0.356121	0.525	0.589	0	Cuticle_3	LOC101735417
0	0.355763	0.112	0.021	0	Cuticle_3	LOC101738526
0	0.354578	0.466	0.467	0	Cuticle_3	LOC101739828
0	0.354069	0.215	0.148	0	Cuticle_3	LOC101741555
0	0.353577	0.231	0.197	0	Cuticle_3	LOC101741065
0	0.352912	0.56	0.6	0	Cuticle_3	LOC101743389
0	0.352025	0.329	0.346	0	Cuticle_3	LOC101741046
0	0.351796	0.126	0.036	0	Cuticle_3	LOC101738739
0	0.350855	0.203	0.13	0	Cuticle_3	LOC101738806
0	0.350057	0.321	0.318	0	Cuticle_3	LOC119628401
0	0.349587	0.481	0.477	0	Cuticle_3	LOC101738242
0	0.349364	0.386	0.398	0	Cuticle_3	LOC101742920
0	0.349297	0.232	0.173	0	Cuticle_3	LOC101743512
0	0.348438	0.459	0.473	0	Cuticle_3	LOC101739387
0	0.348099	0.22	0.162	0	Cuticle_3	LOC101738499
0	0.347638	0.468	0.483	0	Cuticle_3	LOC101740483
0	0.34563	0.397	0.424	0	Cuticle_3	LOC101741438
0	0.345188	0.112	0.002	0	Cuticle_3	LOC101735566
0	0.344162	0.153	0.05	0	Cuticle_3	LOC101743450
0	0.343973	0.438	0.453	0	Cuticle_3	LOC101740816
0	0.343242	0.249	0.209	0	Cuticle_3	LOC101745170
0	0.342841	0.406	0.423	0	Cuticle_3	LOC732925
0	0.342392	0.27	0.239	0	Cuticle_3	LOC101745555
0	0.339082	0.299	0.289	0	Cuticle_3	LOC101742337
0	0.33813	0.162	0.076	0	Cuticle_3	LOC101746771
0	0.337824	0.742	0.792	0	Cuticle_3	LOC692504
0	0.33745	0.134	0.02	0	Cuticle_3	LOC101737544
0	0.337292	0.151	0.059	0	Cuticle_3	LOC101741902
0	0.33671	0.376	0.388	0	Cuticle_3	LOC110384729
0	0.336518	0.553	0.593	0	Cuticle_3	LOC101741049
0	0.336421	0.285	0.268	0	Cuticle_3	LOC101739413
0	0.336062	0.183	0.122	0	Cuticle_3	LOC101742032
0	0.334838	0.323	0.332	0	Cuticle_3	LOC101738468
0	0.333905	0.479	0.499	0	Cuticle_3	LOC101736619
0	0.333857	0.51	0.518	0	Cuticle_3	LOC101743893
0	0.333763	0.156	0.06	0	Cuticle_3	LOC101744304
0	0.332528	0.215	0.175	0	Cuticle_3	LOC101744802
0	0.331137	0.158	0.084	0	Cuticle_3	LOC101739165
0	0.331121	0.317	0.335	0	Cuticle_3	LOC101738747
0	0.331116	0.355	0.362	0	Cuticle_3	LOC101736319
0	0.331031	0.105	0.005	0	Cuticle_3	LOC101742979
0	0.330974	0.473	0.507	0	Cuticle_3	LOC101737958
0	0.328549	0.654	0.711	0	Cuticle_3	LOC101745352
0	0.327487	0.233	0.205	0	Cuticle_3	LOC101742489
0	0.326327	0.346	0.377	0	Cuticle_3	LOC101742706
0	0.326117	0.655	0.708	0	Cuticle_3	SOD
0	0.325281	0.52	0.701	0	Cuticle_3	LOC732921
0	0.323191	0.495	0.514	0	Cuticle_3	LOC101738765
0	0.322787	0.434	0.432	0	Cuticle_3	LOC101741505
0	0.321556	0.107	0.02	0	Cuticle_3	LOC119629811
0	0.321019	0.343	0.378	0	Cuticle_3	LOC101735931
0	0.319622	0.1	0.005	0	Cuticle_3	LOC101741817
0	0.319491	0.122	0.04	0	Cuticle_3	LOC101735608
0	0.316728	0.105	0.003	0	Cuticle_3	GSTe5
0	0.316333	0.104	0.003	0	Cuticle_3	LOC101742652
0	0.316216	0.316	0.319	0	Cuticle_3	LOC101744384
0	0.315894	0.391	0.389	0	Cuticle_3	LOC101745679
0	0.315499	0.421	0.444	0	Cuticle_3	LOC101735428
0	0.315017	0.35	0.343	0	Cuticle_3	LOC101741924
0	0.314413	0.6	0.636	0	Cuticle_3	LOC101742474
0	0.314182	0.14	0.04	0	Cuticle_3	LOC119630894
0	0.313078	0.15	0.086	0	Cuticle_3	LOC101741784
0	0.310862	0.34	0.35	0	Cuticle_3	LOC101745833
0	0.310786	0.353	0.378	0	Cuticle_3	LOC101742366
0	0.310151	0.144	0.071	0	Cuticle_3	LOC105842115
0	0.310081	0.106	0.012	0	Cuticle_3	LOC101737332
0	0.307753	0.106	0.024	0	Cuticle_3	LOC101739993
0	0.307684	0.101	0.025	0	Cuticle_3	LOC101745445
0	0.30678	0.256	0.242	0	Cuticle_3	LOC101743207
0	0.304036	0.36	0.376	0	Cuticle_3	LOC101741966
0	0.301546	0.31	0.347	0	Cuticle_3	LOC101745139
0	0.301335	0.143	0.064	0	Cuticle_3	LOC101737638
0	0.300255	0.352	0.381	0	Cuticle_3	LOC101744531
0	0.297883	0.13	0.053	0	Cuticle_3	LOC119630241
0	0.295617	0.477	0.533	0	Cuticle_3	LOC101739416
0	0.293494	0.266	0.293	0	Cuticle_3	LOC101744301
0	0.29054	0.316	0.33	0	Cuticle_3	LOC101744488
0	0.288248	0.122	0.043	0	Cuticle_3	LOC101736255
0	0.288228	0.564	0.619	0	Cuticle_3	LOC101744610
0	0.288099	0.38	0.421	0	Cuticle_3	LOC101742697
0	0.287784	0.104	0.026	0	Cuticle_3	LOC101736906
0	0.287343	0.823	0.871	0	Cuticle_3	LOC101741876
0	0.286918	0.365	0.4	0	Cuticle_3	LOC101746869
0	0.286726	0.408	0.449	0	Cuticle_3	LOC101746806
0	0.286105	0.237	0.227	0	Cuticle_3	LOC101743701
0	0.285352	0.375	0.396	0	Cuticle_3	LOC101746055
0	0.284321	0.125	0.04	0	Cuticle_3	LOC101743589
0	0.284162	0.324	0.329	0	Cuticle_3	LOC101744566
0	0.279047	0.326	0.337	0	Cuticle_3	LOC692641
0	0.278822	0.6	0.676	0	Cuticle_3	LOC101746856
0	0.277136	0.277	0.278	0	Cuticle_3	LOC101737795
0	0.275807	0.273	0.302	0	Cuticle_3	LOC101745950
0	0.269454	0.1	0.026	0	Cuticle_3	LOC101740884
0	0.267566	0.374	0.431	0	Cuticle_3	MOF
0	0.267184	0.341	0.389	0	Cuticle_3	LOC101737955
0	0.266344	0.552	0.64	0	Cuticle_3	Hsp21.4
0	0.265733	0.291	0.308	0	Cuticle_3	LOC101737753
0	0.265539	0.295	0.311	0	Cuticle_3	LOC101744747
0	0.264562	0.111	0.032	0	Cuticle_3	LOC101742240
0	0.263839	0.248	0.257	0	Cuticle_3	Rbmx2
0	0.25843	0.363	0.405	0	Cuticle_3	LOC101735902
0	0.257683	0.263	0.271	0	Cuticle_3	LOC101741196
0	0.256587	0.367	0.403	0	Cuticle_3	LOC101744939
0	0.251963	0.247	0.258	0	Cuticle_3	LOC101746309
0	0.251714	0.63	0.725	0	Cuticle_3	LOC101747153
0	0.250918	0.294	0.333	0	Cuticle_3	LOC101746034
0	0.250649	0.526	0.608	0	Cuticle_3	LOC101743500
4.94065645841247e-324	0.491744	0.374	0.257	7.96532634225258e-320	Cuticle_3	LOC101744111
4.94065645841247e-324	0.301718	0.336	0.35	7.96532634225258e-320	Cuticle_3	LOC101741993
7.90505033345994e-323	0.291357	0.238	0.223	1.27445221476041e-318	Cuticle_3	LOC101740133
1.87744945419674e-322	0.338242	0.247	0.197	3.02682401005598e-318	Cuticle_3	LOC101738985
2.32210853545386e-322	0.370515	0.249	0.182	3.74370338085871e-318	Cuticle_3	LOC101740532
4.64421707090772e-322	0.347043	0.207	0.157	7.48740676171742e-318	Cuticle_3	LOC101738489
4.99006302299659e-322	0.384432	0.29	0.208	8.0449796056751e-318	Cuticle_3	Smurf2
6.02760087926321e-322	0.387648	0.294	0.254	9.71769813754814e-318	Cuticle_3	LOC101740515
4.63927641444931e-321	0.265379	0.361	0.386	7.47944143537517e-317	Cuticle_3	LOC101737700
5.78106212198843e-320	0.338042	0.174	0.096	9.32022835306974e-316	Cuticle_3	LOC101744349
1.16555026510408e-319	0.371972	0.375	0.359	1.87910013740081e-315	Cuticle_3	LOC101745506
2.57171049973286e-319	0.402348	0.253	0.168	4.14611166766931e-315	Cuticle_3	LOC101743585
2.09340060733749e-318	0.43906	0.282	0.195	3.3749804591495e-314	Cuticle_3	LOC101743471
4.56629303724564e-318	0.337123	0.297	0.268	7.36177763464741e-314	Cuticle_3	LOC110384706
4.81121125920206e-318	0.43262	0.272	0.186	7.75663479208556e-314	Cuticle_3	LOC101742550
1.0881015225933e-317	0.511277	0.305	0.168	1.75423727472492e-313	Cuticle_3	LOC110386053
4.27315647858334e-317	0.416581	0.336	0.276	6.88918287477206e-313	Cuticle_3	LOC101743341
4.50565833679412e-317	0.318217	0.271	0.248	7.26402237057949e-313	Cuticle_3	LOC101742930
4.69433182918859e-316	0.277234	0.134	0.055	7.56820177501785e-312	Cuticle_3	LOC101737441
1.75503626167965e-315	0.287177	0.314	0.304	2.82946946107993e-311	Cuticle_3	LOC101742658
6.25937790858695e-315	0.460137	0.234	0.139	1.00913690642239e-310	Cuticle_3	PKG-I
1.22996553166836e-314	0.417327	0.227	0.125	1.98295043015573e-310	Cuticle_3	LOC101745159
1.97736895691736e-314	0.439268	0.265	0.199	3.18791423234217e-310	Cuticle_3	LOC101735829
3.42084619408232e-314	0.258429	0.284	0.296	5.51508823409952e-310	Cuticle_3	LOC101735315
3.82509728498184e-314	0.413634	0.132	0.075	6.16682184284772e-310	Cuticle_3	LOC101739171
9.69924437164896e-314	0.271834	0.391	0.408	0	Cuticle_3	LOC101735591
1.2004774138116e-313	0.264297	0.273	0.276	0	Cuticle_3	LOC105842101
1.4471260233219e-313	0.458954	0.451	0.341	0	Cuticle_3	LOC101740358
3.72617015589697e-313	0.389456	0.222	0.126	0	Cuticle_3	LOC101746065
4.43488498286189e-313	0.417232	0.398	0.254	0	Cuticle_3	LOC101740925
4.507482588471e-313	0.301852	0.191	0.161	0	Cuticle_3	LOC101737678
8.6498180412637e-313	0.392451	0.11	0.049	0	Cuticle_3	LOC101741207
2.15252165472934e-312	0.321421	0.256	0.23	#######	Cuticle_3	tab1
7.60349340350162e-312	0.323944	0.124	0.04	#######	Cuticle_3	LOC101739354
0	0.529918	0.23	0.123	#######	Cuticle_3	H2b-l
0	0.276419	0.455	0.473	#######	Cuticle_3	LOC101746280
#######	0.359821	0.131	0.051	#######	Cuticle_3	Gcy
#######	0.435793	0.248	0.163	#######	Cuticle_3	LOC101742499
#######	0.408916	0.335	0.278	#######	Cuticle_3	LOC101741278
#######	0.345487	0.134	0.048	#######	Cuticle_3	LOC101742565
#######	0.38919	0.174	0.108	#######	Cuticle_3	LOC101738340
#######	0.413893	0.271	0.163	#######	Cuticle_3	LOC101736790
#######	0.367006	0.323	0.273	#######	Cuticle_3	LOC101735857
#######	0.365585	0.267	0.203	#######	Cuticle_3	LOC101743736
#######	0.347361	0.298	0.253	#######	Cuticle_3	LOC101739426
#######	0.400168	0.295	0.216	#######	Cuticle_3	LOC101736339
#######	0.308353	0.156	0.07	#######	Cuticle_3	LOC101744941
#######	0.331881	0.139	0.051	#######	Cuticle_3	LOC101736762
#######	0.402844	0.38	0.32	#######	Cuticle_3	LOC101740369
#######	0.321392	0.101	0.049	#######	Cuticle_3	LOC105842176
#######	0.266939	0.442	0.476	#######	Cuticle_3	LOC101741386
#######	0.355784	0.288	0.25	#######	Cuticle_3	LOC101743924
#######	0.39159	0.251	0.161	#######	Cuticle_3	LOC105841270
#######	0.315784	0.19	0.153	#######	Cuticle_3	SCRB12
#######	0.318342	0.129	0.047	#######	Cuticle_3	LOC101740694
#######	0.252528	0.102	0.03	#######	Cuticle_3	LOC101742562
#######	0.257036	0.264	0.28	#######	Cuticle_3	LOC101743063
#######	0.403078	0.307	0.24	#######	Cuticle_3	LOC101746875
#######	0.316785	0.343	0.335	#######	Cuticle_3	LOC101739698
#######	0.403449	0.198	0.103	#######	Cuticle_3	LOC101743819
#######	0.305391	0.265	0.249	#######	Cuticle_3	LOC101740587
#######	0.323682	0.233	0.196	#######	Cuticle_3	LOC101743876
#######	0.347508	0.14	0.053	#######	Cuticle_3	Dl
#######	0.331375	0.342	0.309	#######	Cuticle_3	LOC101744101
#######	0.30897	0.319	0.306	#######	Cuticle_3	LOC101739290
#######	0.303245	0.344	0.354	#######	Cuticle_3	LOC101740658
#######	0.456019	0.245	0.153	#######	Cuticle_3	LOC105841794
#######	0.359482	0.247	0.187	#######	Cuticle_3	LOC101740491
#######	0.353302	0.331	0.285	#######	Cuticle_3	LOC101745564
#######	0.377059	0.306	0.245	#######	Cuticle_3	LOC101745243
#######	0.357939	0.386	0.377	#######	Cuticle_3	LOC101738888
#######	0.477525	0.274	0.156	#######	Cuticle_3	LOC101740640
#######	0.372116	0.221	0.131	#######	Cuticle_3	LOC101742309
#######	0.391092	0.203	0.133	#######	Cuticle_3	LOC101739061
#######	0.283003	0.287	0.285	#######	Cuticle_3	LOC101740005
#######	0.51032	0.377	0.244	#######	Cuticle_3	LOC101741141
#######	0.39782	0.195	0.091	#######	Cuticle_3	LOC101744460
#######	0.381149	0.296	0.238	#######	Cuticle_3	LOC101738201
#######	0.343605	0.249	0.183	#######	Cuticle_3	LOC101740243
#######	0.423082	0.422	0.394	#######	Cuticle_3	LOC101735410
#######	0.283676	0.118	0.045	#######	Cuticle_3	LOC100862761
#######	0.312979	0.332	0.32	#######	Cuticle_3	LOC101743777
#######	0.303091	0.2	0.156	#######	Cuticle_3	LOC101742487
#######	0.286515	0.184	0.144	#######	Cuticle_3	LOC101742597
#######	0.398818	0.12	0.044	#######	Cuticle_3	LOC101739051
#######	0.316717	0.292	0.28	#######	Cuticle_3	LOC101739592
#######	0.445761	0.206	0.117	#######	Cuticle_3	LOC101745779
#######	0.309995	0.201	0.13	#######	Cuticle_3	LOC101741516
#######	0.378508	0.208	0.121	#######	Cuticle_3	Lkb1
#######	0.36801	0.179	0.102	#######	Cuticle_3	LOC101735742
#######	0.72223	0.101	0.032	#######	Cuticle_3	PGRP-S5
#######	0.406953	0.387	0.322	#######	Cuticle_3	LOC101737733
#######	0.426153	0.304	0.195	#######	Cuticle_3	LOC101742102
#######	0.26289	0.286	0.293	#######	Cuticle_3	LOC101742693
#######	0.412968	0.261	0.183	#######	Cuticle_3	LOC101736084
#######	0.297939	0.154	0.08	#######	Cuticle_3	LOC101745700
#######	0.318241	0.18	0.111	#######	Cuticle_3	LOC101745272
#######	0.287325	0.125	0.053	#######	Cuticle_3	LOC101743748
#######	0.429281	0.402	0.344	#######	Cuticle_3	LOC101737550
#######	0.344992	0.178	0.074	#######	Cuticle_3	LOC101746660
#######	0.37608	0.356	0.318	#######	Cuticle_3	LOC101744578
#######	0.273862	0.274	0.263	#######	Cuticle_3	LOC101737674
#######	0.326172	0.118	0.044	#######	Cuticle_3	LOC101745484
#######	0.273974	0.226	0.209	#######	Cuticle_3	LOC101736051
#######	0.252674	0.244	0.241	#######	Cuticle_3	LOC101745699
#######	0.407277	0.356	0.295	#######	Cuticle_3	LOC101738425
#######	0.27241	0.186	0.149	#######	Cuticle_3	LOC101743992
#######	0.360407	0.179	0.082	#######	Cuticle_3	LOC101740254
#######	0.308271	0.251	0.217	#######	Cuticle_3	LOC101743683
#######	0.276493	0.123	0.055	#######	Cuticle_3	LOC105842055
#######	0.302437	0.198	0.14	#######	Cuticle_3	LOC101743519
#######	0.357691	0.113	0.068	#######	Cuticle_3	LOC101742766
#######	0.336987	0.17	0.083	#######	Cuticle_3	LOC101737831
#######	0.381314	0.18	0.111	#######	Cuticle_3	LOC101735348
#######	0.445408	0.315	0.208	#######	Cuticle_3	LOC100862771
#######	0.271404	0.267	0.256	#######	Cuticle_3	LOC101739802
#######	0.308615	0.418	0.415	#######	Cuticle_3	LOC101745326
#######	0.263629	0.388	0.403	#######	Cuticle_3	LOC101741222
#######	0.361382	0.613	0.534	#######	Cuticle_3	LOC101741252
#######	0.295645	0.343	0.332	#######	Cuticle_3	LOC101744224
#######	0.458041	0.354	0.295	#######	Cuticle_3	LOC101745942
#######	0.307549	0.107	0.04	#######	Cuticle_3	LOC101735594
#######	0.279981	0.141	0.074	#######	Cuticle_3	LOC101745027
#######	0.284881	0.122	0.056	#######	Cuticle_3	Lrpl
#######	0.306274	0.299	0.274	#######	Cuticle_3	LOC101741486
#######	0.258376	0.263	0.274	#######	Cuticle_3	LOC101746676
#######	0.339683	0.254	0.203	#######	Cuticle_3	LOC101735798
#######	0.344861	0.183	0.105	#######	Cuticle_3	LOC101735586
#######	0.33088	0.216	0.156	#######	Cuticle_3	LOC101735813
#######	0.268503	0.238	0.226	#######	Cuticle_3	LOC101745249
#######	0.392504	0.237	0.155	#######	Cuticle_3	LOC105842466
#######	0.415637	0.356	0.289	#######	Cuticle_3	LOC101742023
#######	0.357209	0.313	0.331	#######	Cuticle_3	LOC101738819
#######	0.281366	0.327	0.321	#######	Cuticle_3	LOC101744508
#######	0.300529	0.3	0.278	#######	Cuticle_3	LOC101739729
#######	0.263969	0.283	0.305	#######	Cuticle_3	LOC101736485
#######	0.31978	0.254	0.224	#######	Cuticle_3	LOC101745956
#######	0.302043	0.37	0.363	#######	Cuticle_3	LOC101740849
#######	0.263809	0.335	0.335	#######	Cuticle_3	LOC101742556
#######	0.351571	0.265	0.206	#######	Cuticle_3	LOC101740139
#######	0.3	0.238	0.203	#######	Cuticle_3	LOC101738185
#######	0.385449	0.263	0.173	#######	Cuticle_3	LOC101742582
#######	0.406039	0.443	0.339	#######	Cuticle_3	LOC119629754
#######	0.293868	0.11	0.154	#######	Cuticle_3	LOC101737711
#######	0.369281	0.386	0.359	#######	Cuticle_3	LOC101746092
#######	0.38867	0.167	0.079	#######	Cuticle_3	LOC101735336
#######	0.380162	0.247	0.179	#######	Cuticle_3	LOC101741568
#######	0.349263	0.224	0.153	#######	Cuticle_3	LOC101742327
#######	0.398839	0.102	0.042	#######	Cuticle_3	LOC100134924
#######	0.377267	0.312	0.264	#######	Cuticle_3	LOC101745221
#######	0.345899	0.114	0.038	#######	Cuticle_3	LOC101746805
#######	0.361874	0.253	0.176	#######	Cuticle_3	LOC101744303
#######	0.376366	0.471	0.437	#######	Cuticle_3	LOC101740556
#######	0.250068	0.302	0.33	#######	Cuticle_3	LOC101738271
#######	0.308707	0.187	0.149	#######	Cuticle_3	LOC101736222
#######	0.302989	0.163	0.087	#######	Cuticle_3	LOC101735331
#######	0.287236	0.25	0.208	#######	Cuticle_3	LOC100862840
#######	0.272472	0.198	0.166	#######	Cuticle_3	LOC101743343
#######	0.282812	0.177	0.125	#######	Cuticle_3	LOC101745334
#######	0.284214	0.102	0.032	#######	Cuticle_3	LOC101744215
#######	0.342451	0.182	0.095	#######	Cuticle_3	LOC101736151
#######	0.316111	0.185	0.119	#######	Cuticle_3	LOC101742846
#######	0.326086	0.238	0.179	#######	Cuticle_3	LOC101740712
#######	0.39133	0.223	0.195	#######	Cuticle_3	LOC119629650
#######	0.278445	0.147	0.085	#######	Cuticle_3	LOC101745083
#######	0.315143	0.183	0.11	#######	Cuticle_3	LOC101741590
#######	0.451326	0.332	0.238	#######	Cuticle_3	LOC101737456
#######	0.322452	0.208	0.16	#######	Cuticle_3	LOC101736271
#######	0.352531	0.23	0.16	#######	Cuticle_3	LOC101745586
#######	0.26535	0.231	0.213	#######	Cuticle_3	LOC101745986
#######	0.37689	0.291	0.225	#######	Cuticle_3	LOC101735710
#######	0.319406	0.244	0.174	#######	Cuticle_3	LOC101741541
#######	0.411668	0.38	0.324	#######	Cuticle_3	LOC101743821
#######	0.32536	0.171	0.082	#######	Cuticle_3	LOC105841811
#######	0.313802	0.131	0.09	#######	Cuticle_3	LOC101742203
#######	0.31743	0.169	0.081	#######	Cuticle_3	LOC101745608
#######	0.286487	0.182	0.106	#######	Cuticle_3	LOC692954
#######	0.353284	0.21	0.125	#######	Cuticle_3	LOC101740931
#######	0.300468	0.111	0.04	#######	Cuticle_3	LOC119631093
#######	0.322584	0.373	0.358	#######	Cuticle_3	LOC101744110
#######	0.317807	0.353	0.328	#######	Cuticle_3	LOC101738244
#######	0.301407	0.167	0.105	#######	Cuticle_3	LOC101741157
#######	0.352849	0.219	0.166	#######	Cuticle_3	Gklp
#######	0.327381	0.16	0.085	#######	Cuticle_3	LOC101742249
#######	0.25014	0.199	0.169	#######	Cuticle_3	LOC101745516
#######	0.275616	0.12	0.065	#######	Cuticle_3	LOC101742128
#######	0.45051	0.302	0.193	#######	Cuticle_3	LOC105842591
#######	0.286632	0.232	0.22	#######	Cuticle_3	LOC101739654
#######	0.262358	0.505	0.516	#######	Cuticle_3	LOC101745407
#######	0.327394	0.324	0.296	#######	Cuticle_3	LOC101745393
#######	0.334505	0.313	0.274	#######	Cuticle_3	LOC101744058
#######	0.369393	0.201	0.113	#######	Cuticle_3	LOC101736113
#######	0.291596	0.201	0.143	#######	Cuticle_3	LOC101743848
#######	0.348369	0.226	0.147	#######	Cuticle_3	LOC101740746
#######	0.358321	0.237	0.167	#######	Cuticle_3	LOC101739059
#######	0.283059	0.281	0.282	#######	Cuticle_3	LOC101736377
#######	0.353028	0.19	0.103	#######	Cuticle_3	LOC101742467
#######	0.345327	0.4	0.346	#######	Cuticle_3	LOC101741374
#######	0.28867	0.171	0.118	#######	Cuticle_3	Nep-L
#######	0.361094	0.202	0.115	#######	Cuticle_3	LOC101745292
#######	0.298838	0.166	0.091	#######	Cuticle_3	LOC101736169
#######	0.426441	0.197	0.128	#######	Cuticle_3	LOC101737866
#######	0.291571	0.169	0.11	#######	Cuticle_3	LOC101736427
#######	0.287806	0.162	0.108	#######	Cuticle_3	LOC101740634
#######	0.390251	0.122	0.065	#######	Cuticle_3	LOC101740303
#######	0.319621	0.216	0.155	#######	Cuticle_3	LOC101744221
#######	0.314071	0.303	0.275	#######	Cuticle_3	Mvb12
#######	0.266103	0.131	0.055	#######	Cuticle_3	LOC101745859
#######	0.313276	0.174	0.093	#######	Cuticle_3	LOC101735840
#######	0.305879	0.208	0.154	#######	Cuticle_3	LOC101739420
#######	0.372966	0.245	0.169	#######	Cuticle_3	LOC101746620
#######	0.314203	0.274	0.244	#######	Cuticle_3	LOC101740850
#######	0.258114	0.243	0.228	#######	Cuticle_3	LOC101743256
#######	0.39104	0.327	0.216	#######	Cuticle_3	LOC105842638
#######	0.341806	0.243	0.182	#######	Cuticle_3	LOC101740956
#######	0.34005	0.192	0.104	#######	Cuticle_3	LOC101740668
#######	0.31571	0.273	0.242	#######	Cuticle_3	LOC101737527
#######	0.27387	0.148	0.099	#######	Cuticle_3	LOC105841935
#######	0.275473	0.272	0.245	#######	Cuticle_3	LOC101741008
#######	0.369174	0.35	0.297	#######	Cuticle_3	LOC101746894
#######	0.25462	0.241	0.226	#######	Cuticle_3	LOC101740573
#######	0.259243	0.52	0.537	#######	Cuticle_3	LOC101742438
#######	0.323034	0.176	0.101	#######	Cuticle_3	LOC101739974
#######	0.287926	0.17	0.114	#######	Cuticle_3	LOC101738854
#######	0.252274	0.235	0.224	#######	Cuticle_3	LOC101742312
#######	0.285438	0.185	0.131	#######	Cuticle_3	LOC101736667
#######	0.311123	0.223	0.158	#######	Cuticle_3	LOC101736754
#######	0.294144	0.293	0.275	#######	Cuticle_3	LOC101739605
#######	0.363409	0.2	0.114	#######	Cuticle_3	LOC101745325
#######	0.338403	0.248	0.151	#######	Cuticle_3	Hnf-4
#######	0.284223	0.257	0.24	#######	Cuticle_3	LOC101746086
#######	0.347247	0.17	0.105	#######	Cuticle_3	LOC101745578
#######	0.324297	0.13	0.06	#######	Cuticle_3	LOC101739913
#######	0.31705	0.2	0.138	#######	Cuticle_3	LOC101737790
#######	0.336985	0.223	0.154	#######	Cuticle_3	LOC101744027
#######	0.250473	0.171	0.129	#######	Cuticle_3	LOC101740260
#######	0.29541	0.134	0.066	#######	Cuticle_3	LOC101742197
#######	0.336792	0.247	0.178	#######	Cuticle_3	LOC101736580
#######	0.256923	0.254	0.228	#######	Cuticle_3	LOC101738431
#######	0.316991	0.205	0.143	#######	Cuticle_3	LOC101744000
#######	0.26762	0.263	0.241	#######	Cuticle_3	LOC101743248
#######	0.313079	0.147	0.082	#######	Cuticle_3	LOC101744910
#######	0.312838	0.194	0.152	#######	Cuticle_3	LOC101741475
#######	0.298527	0.207	0.151	#######	Cuticle_3	LOC101746427
#######	0.326339	0.174	0.11	#######	Cuticle_3	LOC101742771
#######	0.285087	0.305	0.283	#######	Cuticle_3	LOC110384829
#######	0.300682	0.283	0.251	#######	Cuticle_3	LOC101736434
#######	0.342419	0.242	0.161	#######	Cuticle_3	LOC101746286
#######	0.275736	0.247	0.215	#######	Cuticle_3	LOC101739651
#######	0.339492	0.236	0.187	#######	Cuticle_3	LOC101743085
#######	0.330033	0.244	0.197	#######	Cuticle_3	LOC101743066
#######	0.281073	0.162	0.099	#######	Cuticle_3	LOC101743121
#######	0.294844	0.156	0.091	#######	Cuticle_3	LOC101741550
#######	0.287261	0.372	0.259	#######	Cuticle_3	LOC119628419
#######	0.28523	0.218	0.177	#######	Cuticle_3	LOC101744331
#######	0.311891	0.189	0.106	#######	Cuticle_3	LOC101741150
#######	0.280695	0.173	0.124	#######	Cuticle_3	LOC101746400
#######	0.286328	0.166	0.095	#######	Cuticle_3	LOC101740803
#######	0.349011	0.196	0.103	#######	Cuticle_3	LOC101747128
#######	0.30175	0.202	0.136	#######	Cuticle_3	LOC101736628
#######	0.29797	0.171	0.119	#######	Cuticle_3	LOC101741333
#######	0.2782	0.192	0.146	#######	Cuticle_3	LOC101744614
#######	0.286695	0.322	0.311	#######	Cuticle_3	LOC101736960
#######	0.263464	0.192	0.16	#######	Cuticle_3	LOC101745461
#######	0.332554	0.238	0.159	#######	Cuticle_3	LOC101741199
#######	0.315332	0.216	0.154	#######	Cuticle_3	LOC101738614
#######	0.29453	0.353	0.311	#######	Cuticle_3	LOC101745609
#######	0.275235	0.223	0.178	#######	Cuticle_3	LOC101736006
#######	0.294213	0.236	0.212	#######	Cuticle_3	LOC101738504
#######	0.283682	0.254	0.21	#######	Cuticle_3	LOC101743695
#######	0.306315	0.256	0.191	#######	Cuticle_3	LOC101743977
#######	0.267461	0.236	0.187	#######	Cuticle_3	LOC101743806
#######	0.312846	0.178	0.111	#######	Cuticle_3	LOC101744966
#######	0.265521	0.781	0.817	#######	Cuticle_3	LOC101742624
#######	0.279184	0.187	0.141	#######	Cuticle_3	LOC101747231
#######	0.253281	0.31	0.308	#######	Cuticle_3	LOC101738552
#######	0.342774	0.535	0.478	#######	Cuticle_3	LOC101743686
#######	0.301947	0.239	0.17	#######	Cuticle_3	LOC101738034
#######	0.299959	0.247	0.227	#######	Cuticle_3	LOC101743043
#######	0.347752	0.247	0.163	#######	Cuticle_3	LOC101736863
#######	0.297928	0.202	0.137	#######	Cuticle_3	LOC101745271
#######	0.301721	0.256	0.222	#######	Cuticle_3	LOC101742566
#######	0.258198	0.192	0.15	#######	Cuticle_3	LOC101741715
#######	0.274511	0.18	0.116	#######	Cuticle_3	LOC101742406
#######	0.268126	0.234	0.2	#######	Cuticle_3	LOC101737157
#######	0.355056	0.225	0.171	#######	Cuticle_3	Cpkc
#######	0.28226	0.298	0.256	#######	Cuticle_3	LOC101742384
#######	0.255454	0.303	0.29	#######	Cuticle_3	LOC101739972
#######	0.267823	0.211	0.165	#######	Cuticle_3	LOC101737789
#######	0.261307	0.248	0.223	#######	Cuticle_3	LOC101738643
#######	0.291026	0.217	0.164	#######	Cuticle_3	LOC101739551
#######	0.305754	0.144	0.076	#######	Cuticle_3	LOC119631181
#######	0.258465	0.281	0.264	#######	Cuticle_3	LOC101744813
#######	0.291423	0.386	0.358	#######	Cuticle_3	LOC101736423
#######	0.273468	0.168	0.114	#######	Cuticle_3	LOC101735986
#######	0.252963	0.123	0.065	#######	Cuticle_3	LOC101745112
#######	0.256164	0.172	0.125	#######	Cuticle_3	LOC101735776
#######	0.262751	0.194	0.138	#######	Cuticle_3	LOC101737124
#######	0.28764	0.147	0.085	#######	Cuticle_3	LOC101738315
#######	0.27585	0.169	0.09	#######	Cuticle_3	yellow-f
#######	0.268687	0.123	0.074	#######	Cuticle_3	LOC101740352
#######	0.276916	0.291	0.281	#######	Cuticle_3	LOC101744602
#######	0.287418	0.144	0.082	#######	Cuticle_3	LOC101736013
#######	0.26639	0.216	0.166	#######	Cuticle_3	LOC101745357
#######	0.293047	0.233	0.186	#######	Cuticle_3	LOC101740753
#######	0.318039	0.158	0.1	#######	Cuticle_3	LOC101740281
#######	0.257078	0.218	0.176	#######	Cuticle_3	LOC101737874
#######	0.284702	0.202	0.148	#######	Cuticle_3	LOC101742015
#######	0.324455	0.207	0.146	#######	Cuticle_3	LOC101736840
#######	0.318372	0.291	0.251	#######	Cuticle_3	InR
#######	0.291066	0.158	0.093	#######	Cuticle_3	LOC101736437
#######	0.353483	0.328	0.256	#######	Cuticle_3	LOC101737192
#######	0.313264	0.264	0.237	#######	Cuticle_3	LOC101735597
#######	0.307871	0.153	0.083	#######	Cuticle_3	LOC101744937
#######	0.267412	0.416	0.405	#######	Cuticle_3	LOC101744404
#######	0.297432	0.306	0.266	#######	Cuticle_3	LOC101739159
#######	0.284865	0.424	0.412	#######	Cuticle_3	LOC101742794
#######	0.254319	0.368	0.351	#######	Cuticle_3	LOC101737221
#######	0.307364	0.34	0.311	#######	Cuticle_3	LOC101736354
#######	0.252075	0.179	0.13	#######	Cuticle_3	LOC101743448
#######	0.270789	0.147	0.083	#######	Cuticle_3	LOC101740919
#######	0.290137	0.385	0.366	#######	Cuticle_3	LOC101744498
#######	0.28629	0.207	0.12	#######	Cuticle_3	LOC101742529
#######	0.260224	0.161	0.097	#######	Cuticle_3	LOC101740687
#######	0.273347	0.404	0.371	#######	Cuticle_3	LOC101747103
#######	0.268267	0.263	0.23	#######	Cuticle_3	LOC101735906
#######	0.29861	0.258	0.218	#######	Cuticle_3	LOC101735304
#######	0.263193	0.155	0.102	#######	Cuticle_3	LOC692966
#######	0.256365	0.175	0.112	#######	Cuticle_3	LOC101745667
#######	0.274815	0.183	0.124	#######	Cuticle_3	LOC101739689
#######	0.267817	0.162	0.137	#######	Cuticle_3	LOC105841518
#######	0.259245	0.224	0.195	#######	Cuticle_3	LOC101738450
#######	0.257082	0.198	0.159	#######	Cuticle_3	LOC101740171
#######	0.31425	0.253	0.209	#######	Cuticle_3	LOC101738967
#######	0.297518	0.165	0.119	#######	Cuticle_3	LOC110384750
#######	0.250828	0.238	0.206	#######	Cuticle_3	LOC101739524
#######	0.253442	0.164	0.097	#######	Cuticle_3	LOC101745569
#######	0.26337	0.121	0.067	#######	Cuticle_3	LOC101735589
#######	0.484075	0.138	0.077	#######	Cuticle_3	CPFL1
#######	0.251656	0.185	0.149	#######	Cuticle_3	LOC101741410
#######	0.25148	0.205	0.177	#######	Cuticle_3	LOC101736356
#######	0.307032	0.251	0.187	#######	Cuticle_3	LOC101741609
#######	0.351731	0.212	0.15	#######	Cuticle_3	LOC105841828
#######	0.284913	0.173	0.126	#######	Cuticle_3	LOC101739554
#######	0.261012	0.105	0.059	#######	Cuticle_3	Spr
#######	0.257018	0.249	0.225	#######	Cuticle_3	LOC101737369
#######	0.251208	0.239	0.216	#######	Cuticle_3	LOC101744693
#######	0.25687	0.241	0.227	#######	Cuticle_3	LOC101743410
#######	0.327571	0.256	0.176	#######	Cuticle_3	LOC101738651
#######	0.261169	0.379	0.321	#######	Cuticle_3	LOC101744743
#######	0.26682	0.156	0.127	#######	Cuticle_3	LOC101738592
#######	0.388502	0.242	0.183	#######	Cuticle_3	LOC101740269
#######	0.289154	0.166	0.098	#######	Cuticle_3	LOC110386795
#######	0.283363	0.301	0.259	#######	Cuticle_3	LOC692448
#######	0.281054	0.176	0.152	#######	Cuticle_3	LOC101741933
#######	0.253985	0.154	0.099	2.59e-98	Cuticle_3	LOC101746727
#######	0.272311	0.108	0.069	3.04e-98	Cuticle_3	LOC101747124
#######	0.34586	0.109	0.082	4.03e-96	Cuticle_3	LOC101743696
2.49e-93	0.259507	0.323	0.291	4.02e-89	Cuticle_3	LOC101739177
1.02e-76	0.253335	0.178	0.166	1.65e-72	Cuticle_3	LOC101736634
3.12e-32	0.442671	0.185	0.167	5.03e-28	Cuticle_3	LOC101740092
0	5.04579	0.984	0.339	0	Apoptosis	CLIP3
0	5.01566	0.962	0.411	0	Apoptosis	CCE-un1
0	4.95638	0.923	0.312	0	Apoptosis	LOC692743
0	4.81296	0.999	0.662	0	Apoptosis	Let-2
0	4.79213	0.974	0.188	0	Apoptosis	LOC101735635
0	4.4638	0.995	0.563	0	Apoptosis	LOC101736620
0	4.40221	0.976	0.205	0	Apoptosis	Scr-c
0	4.02408	0.945	0.13	0	Apoptosis	LOC101739113
0	3.8065	0.774	0.122	0	Apoptosis	LOC692390
0	3.7931	0.974	0.338	0	Apoptosis	LOC692392
0	3.71372	0.68	0.17	0	Apoptosis	Ldlr
0	3.62844	0.898	0.078	0	Apoptosis	LOC101735714
0	3.58854	0.999	0.813	0	Apoptosis	SPARC
0	3.39888	0.981	0.408	0	Apoptosis	LOC101741233
0	3.39528	0.976	0.287	0	Apoptosis	LOC101742998
0	3.34746	0.902	0.079	0	Apoptosis	LOC101746897
0	3.3314	0.966	0.399	0	Apoptosis	LOC101743038
0	3.31444	0.771	0.049	0	Apoptosis	LOC101744658
0	3.30575	0.928	0.1	0	Apoptosis	LOC101737467
0	3.20379	0.935	0.301	0	Apoptosis	LOC101746713
0	3.06509	0.889	0.336	0	Apoptosis	LOC105841272
0	3.04217	0.938	0.205	0	Apoptosis	LOC105842669
0	3.02007	0.534	0.054	0	Apoptosis	Y-b
0	3.00012	0.741	0.052	0	Apoptosis	LOC100134929
0	2.88894	0.642	0.225	0	Apoptosis	LOC119628419
0	2.81969	0.608	0.067	0	Apoptosis	LOC101736812
0	2.81245	0.876	0.16	0	Apoptosis	LOC105842482
0	2.60664	0.601	0.022	0	Apoptosis	LOC110386871
0	2.58162	0.886	0.298	0	Apoptosis	LOC101737256
0	2.55374	0.669	0.025	0	Apoptosis	LOC110385485
0	2.54505	0.915	0.298	0	Apoptosis	LOC101746961
0	2.48113	0.635	0.126	0	Apoptosis	LOC101739681
0	2.46802	0.738	0.091	0	Apoptosis	LOC101741075
0	2.45044	0.883	0.2	0	Apoptosis	LOC101736589
0	2.43341	0.686	0.152	0	Apoptosis	LOC101738829
0	2.3692	0.779	0.043	0	Apoptosis	LOC101738553
0	2.36824	0.815	0.237	0	Apoptosis	LOC101737658
0	2.3438	0.847	0.186	0	Apoptosis	LOC101738149
0	2.31321	0.881	0.291	0	Apoptosis	LOC119629990
0	2.30675	0.96	0.702	0	Apoptosis	Sap-r
0	2.27573	0.801	0.205	0	Apoptosis	LOC101740657
0	2.22729	0.849	0.26	0	Apoptosis	LOC119628382
0	2.21065	0.514	0.095	0	Apoptosis	LOC101739536
0	2.18019	0.757	0.111	0	Apoptosis	LOC101746328
0	2.16224	0.817	0.23	0	Apoptosis	LOC101745869
0	2.10978	0.514	0.017	0	Apoptosis	LOC101740531
0	2.10836	0.686	0.103	0	Apoptosis	LOC692903
0	2.08172	0.329	0.051	0	Apoptosis	CSP7
0	2.07431	0.686	0.033	0	Apoptosis	LOC101741742
0	2.07099	0.715	0.028	0	Apoptosis	LOC101737252
0	2.05534	0.45	0.109	0	Apoptosis	LOC101741764
0	2.02672	0.793	0.188	0	Apoptosis	LOC101742334
0	2.02581	0.76	0.293	0	Apoptosis	LOC101735439
0	2.01594	0.988	0.863	0	Apoptosis	LOC101745433
0	1.91618	0.7	0.035	0	Apoptosis	LOC101737253
0	1.91403	0.623	0.022	0	Apoptosis	LOC101746113
0	1.89318	0.598	0.421	0	Apoptosis	LOC101742345
0	1.88135	0.889	0.402	0	Apoptosis	LOC101745606
0	1.87764	0.948	0.666	0	Apoptosis	bcpi
0	1.87588	0.52	0.1	0	Apoptosis	LOC101739958
0	1.83176	0.457	0.134	0	Apoptosis	LOC101740092
0	1.82197	0.698	0.494	0	Apoptosis	LOC778466
0	1.81841	0.703	0.094	0	Apoptosis	LOC101742581
0	1.77941	0.824	0.343	0	Apoptosis	LOC100037427
0	1.75602	0.993	0.933	0	Apoptosis	LOC692927
0	1.75183	0.967	0.838	0	Apoptosis	Ppib
0	1.75108	0.72	0.128	0	Apoptosis	LOC101736668
0	1.75002	0.269	0.012	0	Apoptosis	LOC100329149
0	1.74666	0.339	0.311	0	Apoptosis	LOC101745621
0	1.73461	0.725	0.252	0	Apoptosis	LOC101746938
0	1.73017	0.758	0.355	0	Apoptosis	LOC101745405
0	1.7245	0.662	0.088	0	Apoptosis	LOC101737711
0	1.71399	0.807	0.407	0	Apoptosis	LOC101746842
0	1.69537	0.792	0.539	0	Apoptosis	LOC101740215
0	1.66136	0.796	0.347	0	Apoptosis	LOC101738278
0	1.65366	0.821	0.499	0	Apoptosis	LOC101746995
0	1.64072	0.906	0.664	0	Apoptosis	Bcp
0	1.61756	0.606	0.186	0	Apoptosis	LOC101738146
0	1.57581	0.828	0.592	0	Apoptosis	Fkbp13
0	1.5755	0.61	0.125	0	Apoptosis	LOC101742655
0	1.52802	0.409	0.164	0	Apoptosis	Adamts-1
0	1.52474	0.717	0.166	0	Apoptosis	LOC101737880
0	1.51642	0.856	0.502	0	Apoptosis	LOC693109
0	1.51236	0.948	0.782	0	Apoptosis	LOC101737399
0	1.50883	0.787	0.283	0	Apoptosis	LOC110385712
0	1.50661	0.743	0.298	0	Apoptosis	LOC101741873
0	1.49049	0.574	0.029	0	Apoptosis	LOC101736393
0	1.48629	0.503	0.036	0	Apoptosis	LOC101742363
0	1.47966	0.699	0.183	0	Apoptosis	LOC101742904
0	1.4754	0.703	0.34	0	Apoptosis	LOC101746459
0	1.45677	0.53	0.031	0	Apoptosis	LOC101743696
0	1.44395	0.627	0.265	0	Apoptosis	LOC101743755
0	1.4315	0.595	0.133	0	Apoptosis	LOC101746219
0	1.42639	0.668	0.339	0	Apoptosis	LOC101743002
0	1.41748	0.51	0.05	0	Apoptosis	LOC101735354
0	1.4058	0.673	0.234	0	Apoptosis	LOC101736949
0	1.39765	0.834	0.562	0	Apoptosis	LOC101745374
0	1.3885	0.699	0.3	0	Apoptosis	LOC100862755
0	1.38097	0.742	0.244	0	Apoptosis	LOC732926
0	1.38027	0.556	0.139	0	Apoptosis	LOC101741700
0	1.37142	0.663	0.512	0	Apoptosis	LOC101737461
0	1.36098	0.751	0.309	0	Apoptosis	LOC101735738
0	1.35332	0.688	0.195	0	Apoptosis	LOC101743076
0	1.34717	0.5	0.027	0	Apoptosis	LOC101737358
0	1.33915	0.434	0.065	0	Apoptosis	LOC101741280
0	1.32915	0.392	0.015	0	Apoptosis	LOC101745086
0	1.32763	0.449	0.028	0	Apoptosis	LOC101739035
0	1.32291	0.518	0.063	0	Apoptosis	LOC105842274
0	1.32272	0.447	0.037	0	Apoptosis	LOC101739105
0	1.32055	0.653	0.218	0	Apoptosis	LOC101744356
0	1.31329	0.762	0.352	0	Apoptosis	LOC101735410
0	1.30056	0.662	0.252	0	Apoptosis	LOC101743606
0	1.29216	0.389	0.11	0	Apoptosis	Defensin
0	1.29119	0.866	0.619	0	Apoptosis	LOC692916
0	1.28799	0.654	0.176	0	Apoptosis	LOC101740740
0	1.2875	0.901	0.762	0	Apoptosis	LOC101745692
0	1.27605	0.477	0.177	0	Apoptosis	LOC101736611
0	1.27254	0.674	0.379	0	Apoptosis	LOC101743289
0	1.2689	0.529	0.08	0	Apoptosis	LOC100101182
0	1.26841	0.642	0.397	0	Apoptosis	LOC101744099
0	1.25314	0.265	0.05	0	Apoptosis	LOC101738162
0	1.24674	0.688	0.205	0	Apoptosis	LOC100302610
0	1.24647	0.807	0.579	0	Apoptosis	LOC101746062
0	1.23971	0.95	0.853	0	Apoptosis	LOC101743420
0	1.23328	0.504	0.214	0	Apoptosis	LOC692632
0	1.22313	0.808	0.552	0	Apoptosis	LOC101737646
0	1.21864	0.986	0.893	0	Apoptosis	PFN
0	1.21481	0.797	0.415	0	Apoptosis	LOC101745117
0	1.21402	0.751	0.421	0	Apoptosis	LOC101743890
0	1.20066	0.571	0.212	0	Apoptosis	LOC101741030
0	1.19501	0.741	0.427	0	Apoptosis	Plin
0	1.19256	0.485	0.037	0	Apoptosis	LOC101738718
0	1.18019	0.715	0.414	0	Apoptosis	LOC101735555
0	1.17867	0.48	0.032	0	Apoptosis	LOC119630217
0	1.17656	0.858	0.608	0	Apoptosis	LOC101743840
0	1.1669	0.445	0.065	0	Apoptosis	LOC105842272
0	1.15915	0.779	0.512	0	Apoptosis	LOC101742410
0	1.15507	0.703	0.325	0	Apoptosis	LOC101739334
0	1.15467	0.479	0.052	0	Apoptosis	LOC101743140
0	1.14751	0.704	0.409	0	Apoptosis	LOC101737218
0	1.13992	0.646	0.334	0	Apoptosis	BGRP2
0	1.13679	0.825	0.557	0	Apoptosis	LOC101737032
0	1.13513	0.514	0.101	0	Apoptosis	LOC101740117
0	1.13348	0.453	0.024	0	Apoptosis	LOC100101154
0	1.12709	0.442	0.011	0	Apoptosis	LOC119629749
0	1.1255	0.689	0.388	0	Apoptosis	LOC101745130
0	1.12504	0.667	0.307	0	Apoptosis	LOC101743059
0	1.12199	0.419	0.014	0	Apoptosis	ST5
0	1.11725	0.727	0.482	0	Apoptosis	LOC101741938
0	1.09655	0.634	0.23	0	Apoptosis	LOC101743908
0	1.09511	0.407	0.022	0	Apoptosis	LOC101741496
0	1.09	0.664	0.326	0	Apoptosis	LOC692815
0	1.08673	0.641	0.318	0	Apoptosis	LOC101737221
0	1.08008	0.476	0.026	0	Apoptosis	LOC110386644
0	1.07879	0.775	0.304	0	Apoptosis	Gata-beta
0	1.07205	0.459	0.071	0	Apoptosis	LOC692570
0	1.06193	0.742	0.514	0	Apoptosis	LOC101738887
0	1.05593	0.425	0.382	0	Apoptosis	Miple
0	1.05191	0.635	0.341	0	Apoptosis	LOC101738733
0	1.05082	0.446	0.027	0	Apoptosis	LOC101747124
0	1.04257	0.496	0.197	0	Apoptosis	LOC101746106
0	1.02663	0.813	0.607	0	Apoptosis	LOC101741305
0	1.01911	0.365	0.055	0	Apoptosis	LOC101746381
0	1.01766	0.798	0.572	0	Apoptosis	LOC692858
0	1.01309	0.629	0.302	0	Apoptosis	LOC101742411
0	0.99705	0.763	0.464	0	Apoptosis	LOC101745493
0	0.995696	0.45	0.094	0	Apoptosis	ICE
0	0.992983	0.401	0.019	0	Apoptosis	LOC778478
0	0.985306	0.647	0.387	0	Apoptosis	LOC101737208
0	0.985205	0.603	0.273	0	Apoptosis	LOC101737730
0	0.966708	0.77	0.511	0	Apoptosis	LOC733058
0	0.965969	0.292	0.041	0	Apoptosis	LOC101746176
0	0.949065	0.771	0.567	0	Apoptosis	LOC101741049
0	0.947467	0.619	0.309	0	Apoptosis	LOC101744416
0	0.942401	0.578	0.273	0	Apoptosis	LOC101740011
0	0.942033	0.617	0.255	0	Apoptosis	LOC101739177
0	0.941863	0.126	0.007	0	Apoptosis	LOC101742928
0	0.940872	0.36	0.008	0	Apoptosis	LOC101744279
0	0.939379	0.598	0.543	0	Apoptosis	LOC100500745
0	0.93409	0.537	0.16	0	Apoptosis	LOC101740416
0	0.923565	0.51	0.172	0	Apoptosis	LOC105842936
0	0.922436	0.828	0.639	0	Apoptosis	LOC693101
0	0.921874	0.779	0.626	0	Apoptosis	LOC101738938
0	0.918702	0.687	0.426	0	Apoptosis	LOC101742318
0	0.917646	0.153	0.008	0	Apoptosis	Sp1
0	0.910647	0.85	0.644	0	Apoptosis	LOC101745417
0	0.909522	0.999	0.982	0	Apoptosis	A4
0	0.908611	0.399	0.01	0	Apoptosis	LOC101735861
0	0.903794	0.621	0.341	0	Apoptosis	LOC692683
0	0.903197	0.697	0.464	0	Apoptosis	LOC101738072
0	0.902338	0.705	0.5	0	Apoptosis	LOC692846
0	0.899845	0.188	0.018	0	Apoptosis	LOC692833
0	0.894635	0.665	0.428	0	Apoptosis	LOC101736985
0	0.886971	0.531	0.194	0	Apoptosis	LOC101746314
0	0.883148	0.73	0.54	0	Apoptosis	LOC101737113
0	0.875147	0.507	0.145	0	Apoptosis	LOC101744332
0	0.873889	0.591	0.232	0	Apoptosis	LOC101739225
0	0.86867	0.654	0.473	0	Apoptosis	LOC101746088
0	0.857224	0.288	0.015	0	Apoptosis	LOC101737728
0	0.856429	0.814	0.659	0	Apoptosis	LOC100037422
0	0.850913	0.606	0.32	0	Apoptosis	LOC101741374
0	0.848797	0.674	0.447	0	Apoptosis	LOC101736916
0	0.848236	0.687	0.38	0	Apoptosis	LOC101742794
0	0.847196	0.464	0.151	0	Apoptosis	LOC101741270
0	0.84461	0.826	0.718	0	Apoptosis	LOC101747020
0	0.843942	0.774	0.501	0	Apoptosis	PGRP-S1
0	0.842488	0.605	0.313	0	Apoptosis	LOC101740203
0	0.840059	0.42	0.106	0	Apoptosis	LOC101742602
0	0.838211	0.593	0.315	0	Apoptosis	LOC101745968
0	0.837537	0.758	0.553	0	Apoptosis	Chc
0	0.830014	0.317	0.027	0	Apoptosis	LOC101738493
0	0.82757	0.394	0.153	0	Apoptosis	LOC101738265
0	0.826524	0.765	0.621	0	Apoptosis	DESAT4
0	0.818137	0.933	0.857	0	Apoptosis	VATPc
0	0.818012	0.583	0.306	0	Apoptosis	LOC101739513
0	0.817487	0.67	0.382	0	Apoptosis	LOC101737540
0	0.816706	0.662	0.437	0	Apoptosis	Rab7
0	0.816233	0.289	0.156	0	Apoptosis	LOC101747084
0	0.813108	0.465	0.133	0	Apoptosis	LOC100101176
0	0.812391	0.77	0.504	0	Apoptosis	LOC101741441
0	0.810856	0.569	0.278	0	Apoptosis	LOC101739428
0	0.80926	0.686	0.434	0	Apoptosis	LOC101737724
0	0.808775	0.524	0.239	0	Apoptosis	LOC101742140
0	0.807041	0.913	0.821	0	Apoptosis	LOC778526
0	0.806803	0.59	0.337	0	Apoptosis	LOC101744646
0	0.802118	0.46	0.157	0	Apoptosis	LOC101742987
0	0.802103	0.455	0.188	0	Apoptosis	LOC101738515
0	0.79676	0.239	0.052	0	Apoptosis	LOC101737757
0	0.794962	0.818	0.638	0	Apoptosis	serpin-2
0	0.786903	0.542	0.231	0	Apoptosis	LOC101744618
0	0.781675	0.466	0.135	0	Apoptosis	LOC101742461
0	0.781204	0.523	0.249	0	Apoptosis	LOC101736018
0	0.777253	0.441	0.401	0	Apoptosis	LOC101746460
0	0.774885	0.851	0.717	0	Apoptosis	Grina
0	0.773344	0.487	0.165	0	Apoptosis	LOC101744639
0	0.770816	0.691	0.479	0	Apoptosis	LOC110386877
0	0.769882	0.787	0.628	0	Apoptosis	LOC101746272
0	0.767722	0.852	0.752	0	Apoptosis	LOC101736808
0	0.767711	0.449	0.286	0	Apoptosis	LOC101738097
0	0.766959	0.43	0.142	0	Apoptosis	LOC101746575
0	0.762968	0.512	0.228	0	Apoptosis	LOC101744553
0	0.762297	0.353	0.143	0	Apoptosis	LOC101738575
0	0.75761	0.864	0.738	0	Apoptosis	LOC101736224
0	0.756568	0.398	0.081	0	Apoptosis	SCRB3
0	0.751443	0.467	0.123	0	Apoptosis	LOC101736914
0	0.749658	0.351	0.138	0	Apoptosis	Hnf-4
0	0.746475	0.264	0.01	0	Apoptosis	LOC101743279
0	0.745575	0.532	0.291	0	Apoptosis	LOC101741823
0	0.745269	0.813	0.664	0	Apoptosis	Scpx
0	0.740008	0.851	0.711	0	Apoptosis	LOC101736010
0	0.739353	0.708	0.505	0	Apoptosis	LOC101737313
0	0.737291	0.344	0.035	0	Apoptosis	LOC101740130
0	0.736496	0.349	0.135	0	Apoptosis	LOC101743490
0	0.735625	0.345	0.057	0	Apoptosis	LOC101746202
0	0.729024	0.689	0.496	0	Apoptosis	LOC101745664
0	0.72115	0.505	0.225	0	Apoptosis	LOC101740873
0	0.721142	0.319	0.113	0	Apoptosis	LOC101746787
0	0.71956	0.211	0.073	0	Apoptosis	LOC101736013
0	0.717571	0.696	0.51	0	Apoptosis	LOC692859
0	0.716168	0.612	0.476	0	Apoptosis	serpin-6
0	0.713999	0.681	0.463	0	Apoptosis	LOC101745102
0	0.713928	0.47	0.178	0	Apoptosis	LOC101738817
0	0.713316	0.539	0.283	0	Apoptosis	LOC101735452
0	0.71328	0.422	0.139	0	Apoptosis	LOC101737037
0	0.709984	0.634	0.422	0	Apoptosis	LOC101742042
0	0.709382	0.227	0.102	0	Apoptosis	LOC101737222
0	0.709186	0.764	0.61	0	Apoptosis	LOC732990
0	0.708729	0.431	0.147	0	Apoptosis	LOC101735590
0	0.703761	0.455	0.164	0	Apoptosis	LOC101747053
0	0.701866	0.299	0.049	0	Apoptosis	p27K
0	0.701424	0.51	0.196	0	Apoptosis	LOC101746161
0	0.697234	0.959	0.892	0	Apoptosis	ERp57
0	0.692505	0.381	0.1	0	Apoptosis	LOC101745110
0	0.69154	0.428	0.141	0	Apoptosis	scf
0	0.688151	0.481	0.129	0	Apoptosis	LOC101743856
0	0.686955	0.796	0.652	0	Apoptosis	Rabb
0	0.685937	0.332	0.063	0	Apoptosis	LOC101747092
0	0.685381	0.894	0.805	0	Apoptosis	LOC101740811
0	0.683204	0.276	0.058	0	Apoptosis	LOC101736902
0	0.680571	0.624	0.426	0	Apoptosis	Gq
0	0.680478	0.654	0.473	0	Apoptosis	LOC693079
0	0.679118	0.764	0.612	0	Apoptosis	Anxb13
0	0.678574	0.852	0.71	0	Apoptosis	LOC101738318
0	0.675147	0.835	0.723	0	Apoptosis	LOC101746261
0	0.675067	0.778	0.615	0	Apoptosis	LOC101742474
0	0.672543	0.717	0.575	0	Apoptosis	LOC692985
0	0.671058	0.496	0.196	0	Apoptosis	LOC101743410
0	0.670447	0.368	0.104	0	Apoptosis	LOC101743988
0	0.668904	0.938	0.849	0	Apoptosis	LOC732949
0	0.664022	0.32	0.009	0	Apoptosis	LOC101746249
0	0.655891	0.299	0.108	0	Apoptosis	LOC110385407
0	0.655534	0.445	0.218	0	Apoptosis	htra2
0	0.655481	0.328	0.046	0	Apoptosis	LOC101744283
0	0.654163	0.741	0.583	0	Apoptosis	LOC101741915
0	0.653722	0.822	0.694	0	Apoptosis	LOC733012
0	0.652228	0.682	0.495	0	Apoptosis	LOC101745039
0	0.648315	0.806	0.687	0	Apoptosis	Iap
0	0.64715	0.283	0.098	0	Apoptosis	LOC101745185
0	0.645733	0.36	0.134	0	Apoptosis	LOC101740603
0	0.640773	0.402	0.269	0	Apoptosis	LOC101743573
0	0.637963	0.409	0.131	0	Apoptosis	LOC101741353
0	0.633949	0.607	0.311	0	Apoptosis	LOC101746344
0	0.633585	0.398	0.117	0	Apoptosis	LOC101739028
0	0.631588	0.333	0.066	0	Apoptosis	LOC101736946
0	0.630924	0.362	0.082	0	Apoptosis	LOC119628664
0	0.629769	0.368	0.054	0	Apoptosis	LOC101740069
0	0.627021	0.758	0.599	0	Apoptosis	Rab11
0	0.621146	0.195	0.011	0	Apoptosis	LOC101739498
0	0.621134	0.624	0.495	0	Apoptosis	LOC101740973
0	0.621102	0.614	0.461	0	Apoptosis	DnaJ-3
0	0.620622	0.595	0.381	0	Apoptosis	LOC692988
0	0.617621	0.94	0.893	0	Apoptosis	Pdi
0	0.616233	0.292	0.009	0	Apoptosis	Rab3
0	0.615982	0.564	0.347	0	Apoptosis	LOC101738293
0	0.615003	0.551	0.325	0	Apoptosis	LOC101738579
0	0.609855	0.323	0.095	0	Apoptosis	LOC101736269
0	0.608893	0.736	0.611	0	Apoptosis	ERD2
0	0.608786	0.292	0.024	0	Apoptosis	LOC101746722
0	0.603713	0.571	0.235	0	Apoptosis	NGR-B1
0	0.600193	0.475	0.296	0	Apoptosis	LOC101745609
0	0.599238	0.325	0.066	0	Apoptosis	LOC119628739
0	0.59883	0.891	0.809	0	Apoptosis	LOC692773
0	0.598154	0.978	0.949	0	Apoptosis	Crt
0	0.596411	0.126	0.052	0	Apoptosis	LOC101741806
0	0.594038	0.604	0.362	0	Apoptosis	LOC101745494
0	0.593646	0.626	0.439	0	Apoptosis	LOC101735584
0	0.591958	0.275	0.069	0	Apoptosis	LOC101739791
0	0.590646	0.938	0.896	0	Apoptosis	HSP70
0	0.590603	0.686	0.482	0	Apoptosis	LOC119630853
0	0.590444	0.631	0.433	0	Apoptosis	E74
0	0.586636	0.571	0.315	0	Apoptosis	LOC100174824
0	0.585886	0.758	0.669	0	Apoptosis	LOC101744423
0	0.585845	0.45	0.219	0	Apoptosis	LOC101737319
0	0.585255	0.215	0.012	0	Apoptosis	LOC101743105
0	0.58523	0.319	0.129	0	Apoptosis	LOC101744899
0	0.580858	0.535	0.288	0	Apoptosis	LOC101736354
0	0.580551	0.688	0.518	0	Apoptosis	LOC101739326
0	0.580295	0.588	0.383	0	Apoptosis	LOC101744333
0	0.579827	0.333	0.08	0	Apoptosis	LOC101746376
0	0.574467	0.264	0.073	0	Apoptosis	LOC101740228
0	0.57214	0.595	0.447	0	Apoptosis	LOC101737365
0	0.569664	0.763	0.653	0	Apoptosis	LOC101745402
0	0.563564	0.527	0.336	0	Apoptosis	LOC101744116
0	0.562467	0.434	0.213	0	Apoptosis	LOC101742921
0	0.559644	0.535	0.339	0	Apoptosis	LOC101736947
0	0.558954	0.476	0.271	0	Apoptosis	LOC101746475
0	0.550018	0.763	0.636	0	Apoptosis	Ras3
0	0.549738	0.303	0.084	0	Apoptosis	LOC101742586
0	0.54871	0.384	0.138	0	Apoptosis	LOC101743133
0	0.546328	0.43	0.211	0	Apoptosis	LOC101743627
0	0.545006	0.127	0.02	0	Apoptosis	LOC101743470
0	0.542493	0.707	0.586	0	Apoptosis	LOC732881
0	0.541786	0.491	0.312	0	Apoptosis	LOC101744218
0	0.541384	0.663	0.487	0	Apoptosis	LOC101738141
0	0.541173	0.515	0.321	0	Apoptosis	LOC101735699
0	0.539785	0.444	0.243	0	Apoptosis	LOC101736831
0	0.539176	0.632	0.417	0	Apoptosis	LOC101740283
0	0.537144	0.484	0.285	0	Apoptosis	LOC101741501
0	0.536667	0.531	0.273	0	Apoptosis	LOC101745942
0	0.535183	0.542	0.416	0	Apoptosis	LOC101745499
0	0.532787	0.612	0.455	0	Apoptosis	LOC101741967
0	0.531757	0.702	0.49	0	Apoptosis	LOC101739890
0	0.529872	0.424	0.256	0	Apoptosis	LOC101736119
0	0.52872	0.258	0.087	0	Apoptosis	LOC101735679
0	0.528054	0.677	0.54	0	Apoptosis	LOC101745680
0	0.526992	0.843	0.756	0	Apoptosis	LOC119629027
0	0.526272	0.609	0.459	0	Apoptosis	LOC733057
0	0.525353	0.866	0.83	0	Apoptosis	LOC692847
0	0.524571	0.557	0.426	0	Apoptosis	LOC101740556
0	0.524428	0.346	0.152	0	Apoptosis	LOC101737106
0	0.52323	0.555	0.354	0	Apoptosis	LOC101746640
0	0.521956	0.258	0.021	0	Apoptosis	LOC100533206
0	0.517604	0.602	0.443	0	Apoptosis	LOC101738677
0	0.517004	0.232	0.007	0	Apoptosis	LOC101745882
0	0.516508	0.103	0.015	0	Apoptosis	LOC101740249
0	0.513402	0.546	0.37	0	Apoptosis	LOC101743249
0	0.513022	0.772	0.682	0	Apoptosis	Ago2
0	0.512979	0.674	0.498	0	Apoptosis	LOC101740818
0	0.512681	0.491	0.309	0	Apoptosis	LOC101740876
0	0.512433	0.937	0.864	0	Apoptosis	LOC733028
0	0.511817	0.564	0.408	0	Apoptosis	LOC101739206
0	0.511087	0.558	0.428	0	Apoptosis	G3pdh-1
0	0.510745	0.484	0.389	0	Apoptosis	LOC101744991
0	0.510515	0.29	0.121	0	Apoptosis	LOC101742524
0	0.50971	0.642	0.24	0	Apoptosis	LOC101740576
0	0.509598	0.624	0.478	0	Apoptosis	LOC101746321
0	0.508228	0.295	0.065	0	Apoptosis	LOC100127126
0	0.505414	0.732	0.606	0	Apoptosis	Tms1
0	0.503338	0.551	0.408	0	Apoptosis	LOC101741421
0	0.502049	0.571	0.408	0	Apoptosis	LOC101739205
0	0.500269	0.595	0.426	0	Apoptosis	LOC101742699
0	0.500121	0.558	0.396	0	Apoptosis	LOC101744115
0	0.499255	0.519	0.354	0	Apoptosis	LOC101745925
0	0.498696	0.334	0.208	0	Apoptosis	LOC101735304
0	0.498529	0.574	0.381	0	Apoptosis	LOC101738129
0	0.497219	0.74	0.649	0	Apoptosis	LOC101742178
0	0.496398	0.327	0.128	0	Apoptosis	LOC101743188
0	0.49626	0.183	0.012	0	Apoptosis	LOC105842409
0	0.492215	0.217	0.084	0	Apoptosis	LOC101735761
0	0.487163	0.338	0.15	0	Apoptosis	LOC101736950
0	0.486894	0.644	0.517	0	Apoptosis	LOC692816
0	0.481584	0.678	0.552	0	Apoptosis	LOC101736274
0	0.478648	0.551	0.372	0	Apoptosis	LOC101741510
0	0.478216	0.716	0.603	0	Apoptosis	LOC101736101
0	0.476979	0.308	0.152	0	Apoptosis	LOC119628811
0	0.476372	0.374	0.168	0	Apoptosis	LOC101739258
0	0.472447	0.502	0.337	0	Apoptosis	LOC101735848
0	0.471704	0.318	0.14	0	Apoptosis	LOC101744427
0	0.471454	0.22	0.033	0	Apoptosis	LOC101742019
0	0.471324	0.33	0.165	0	Apoptosis	LOC101737901
0	0.471003	0.501	0.343	0	Apoptosis	LOC101737991
0	0.469306	0.18	0.019	0	Apoptosis	LOC101739478
0	0.46862	0.554	0.406	0	Apoptosis	LOC101746833
0	0.468031	0.42	0.262	0	Apoptosis	LOC101746084
0	0.467822	0.314	0.183	0	Apoptosis	LOC119628373
0	0.466854	0.573	0.455	0	Apoptosis	LOC101741705
0	0.466492	0.264	0.102	0	Apoptosis	LOC101743107
0	0.466223	0.464	0.289	0	Apoptosis	LOC101739472
0	0.465961	0.53	0.345	0	Apoptosis	LOC101745162
0	0.465641	0.481	0.296	0	Apoptosis	LOC692828
0	0.46483	0.561	0.397	0	Apoptosis	LOC101744329
0	0.464419	0.355	0.186	0	Apoptosis	LOC101739269
0	0.462828	0.233	0.085	0	Apoptosis	LOC101744519
0	0.462677	0.523	0.406	0	Apoptosis	LOC101740678
0	0.457508	0.203	0.012	0	Apoptosis	LOC119629970
0	0.455185	0.356	0.16	0	Apoptosis	LOC101738757
0	0.453261	0.742	0.674	0	Apoptosis	LOC101738101
0	0.453039	0.409	0.151	0	Apoptosis	LOC101738478
0	0.452025	0.705	0.582	0	Apoptosis	LOC101737357
0	0.451646	0.504	0.351	0	Apoptosis	LOC101735961
0	0.449794	0.406	0.29	0	Apoptosis	LOC101738908
0	0.449166	0.451	0.264	0	Apoptosis	LOC100127129
0	0.448794	0.729	0.629	0	Apoptosis	LOC101743042
0	0.448013	0.29	0.101	0	Apoptosis	LOC101736113
0	0.445464	0.352	0.14	0	Apoptosis	LOC101746672
0	0.444467	0.276	0.107	0	Apoptosis	LOC101740027
0	0.443058	0.511	0.367	0	Apoptosis	LOC101737459
0	0.442711	0.42	0.231	0	Apoptosis	LOC101746939
0	0.441951	0.404	0.219	0	Apoptosis	LOC101742094
0	0.441036	0.727	0.657	0	Apoptosis	LOC692977
0	0.440751	0.569	0.441	0	Apoptosis	LOC101737810
0	0.440719	0.388	0.227	0	Apoptosis	LOC101738615
0	0.440569	0.711	0.601	0	Apoptosis	slmo
0	0.437058	0.714	0.611	0	Apoptosis	LOC692984
0	0.436501	0.544	0.404	0	Apoptosis	LOC101746184
0	0.435826	0.743	0.535	0	Apoptosis	LOC101738787
0	0.433474	0.72	0.62	0	Apoptosis	LOC101737095
[truncated: 4,867 more rows]

## Sheet: table S3
Sample name	Timepoint	Tissue	nMID_mean	uGenes_mean	nMID_median	nGenes_median
502	L5D2	Bombyx wing dics	355	224	328	223
503	L5D3	Bombyx wing dics	387	238	380	241
WD2-2	W2	Bombyx wing dics	247	156	251	165

## Sheet: Table S4
Gene ID	Gene Symbol	Reported Function	Functional Validation	Cell Type Specificity	Spatial Distribution	Temporal Expression
692466	Erk	Regulate cell proliferation	S-phase arrest in the cell cycle, leading to cell differentiation and cessation of proliferation.	Wing morphogenesis cell, Immune	wing bud	L5D1
692745	WNT-1	Important member of the Wnt signaling pathway	After RNAi, the development of wing primordia exhibits significant abnormalities.	Wing morphogenesis cell	wing bud	L5D1
692747	LOC692747	Regulate wing development and control ecdysone synthesis	Overexpression induces upregulation of the 20E synthase gene; RNAi affects 20E synthesis in Bombyx mori.	Wing morphogenesis cell	wing bud, Epidermis	L5D1
693025	SGF3	Participate in regulating the expression of wing disc cuticular protein genes	RNAi disrupts the normal regulation of epidermal protein gene expression, leading to abnormal wing primordium development in Bombyx mori.	Epithelial 1	wing bud, Epidermis	L5D1
733024	LOC733024	Participate in the regulation of the cell cycle		Immune	wing bud, hemopoietic organ	L5D1
100049060	Titin2	Play a critical role in muscle structure, function, and elasticity		Wing morphogenesis cell, Epithelial 1	wing bud, Epidermis	L5D1
100302627	Stat	Regulate cell proliferation and differentiation, participate in hormone signal transduction, and maintain intracellular environmental stability	After RNAi, cell proliferation and differentiation are blocked, resulting in downregulation of genes related to the JAK/STAT signaling pathway and decreased responsiveness to hormones such as ecdysone.	Cuticle_1	Larvae cuticle, wing bud	L5D1
100529216	raf	Regulate cell proliferation	Significantly decreased wing proliferation ability after RNAi.	Immune	hemopoietic organ, wing bud	L5D1
101736045	LOC101736045	four-jointed box kinase		Wing morphogenesis cell	wing bud	L5D1
101738271	LOC101738271	Participate in the methylation process of Bombyx mori histone H3		Cuticle 2	wing bud, Larvae cuticle	L5D1
101740849	LOC101740849	Participate in regulating signaling pathways such as JAK/STAT		Wing morphogenesis cell	wing bud	L5D1
101741346	LOC101741346	exostosin glycosyltransferase		Wing morphogenesis cell	wing bud	L5D1
101744208	LOC101744208	Participate in the regulation of cell proliferation and differentiation, and signal transduction in wing axis development	After knockout or RNAi, the wings exhibit abnormalities in both size and morphology.	Epithelial 1	wing bud, Epidermis	L5D1
101744352	LOC101744352	Wing pattern formation and abdominal development		Immune	hemopoietic organ, wing bud	L5D1
101745281	LOC101745281	Key gene in the Wnt signaling pathway		Wing morphogenesis cell	wing bud	L5D1
101746320	LOC101746320	Participate in the JAK/STAT signaling pathway	After RNAi, cell proliferation is impaired.	Immune	hemopoietic organ, wing bud	L5D1
101747103	LOC101747103	Regulate cell proliferation and differentiation	RNAi can lead to incomplete wing development, causing a decrease in wing area.	Wing morphogenesis cell	wing bud	L5D1
100144579	LOC100144579	Key genes in the Hippo signaling pathway	The prothoracic wing primordium is significantly reduced.	Epithelial 1	wing bud, Epidermis, hemopoietic organ	L5D5
100270781	Dpp	Participate in wing disc morphogenesis	After RNAi, cell proliferation and differentiation are impaired, causing malformed wing vein structures in adult insects.	Wing morphogenesis cell	wing bud	L5D5
100862782	myc	Promote cell proliferation, immortalization, dedifferentiation, and transformation		Immune	hemopoietic organ, wing bud	L5D5
101738132	LOC101738132	Regulate cell proliferation and apoptosis, participate in cell adhesion and tissue morphogenesis		Wing morphogenesis cell	wing bud	L5D5
101739449	LOC101739449	Regulate cell proliferation, apoptosis, and wing disc development		Immune	hemopoietic organ, wing bud	L5D5
101742244	LOC101742244	serine/threonine-protein kinase warts		Wing morphogenesis cell	wing bud	L5D5
101743158	LOC101743158	Regulate wing size, shape, and normal development of flight muscles	After RNA interference, the flight muscles are damaged.	Wing morphogenesis cell	wing bud	L5D5
692641	LOC692641	Promote cell proliferation	Significantly slowed cell proliferation rate in wing primordium after RNAi.	Immune, Epithelial 1	wing bud, hemopoietic organ	L5D6
100862771	LOC100862771	Interact with signaling pathways such as Hippo		Immune	hemopoietic organ, wing bud	L5D6
101740233	LOC101740233	Regulate cell proliferation	Using mevastatin to interfere with the membrane-binding ability of Ras protein, it was found to have an effect on the proliferation of Bombyx mori BmN cells.	Immune	hemopoietic organ, wing bud	L5D6
692399	ap	Participate in proximal-distal axis development of wings, cooperatively regulate the expression of wing development-related genes	After RNAi, the wing area significantly decreases, and the aspect ratio (length-to-width) of the wing becomes notably smaller.	Wing morphogenesis cell, Immune	Epidermis	L5D7
692532	LOC692532	guanine nucleotide-binding protein G(s) subunit alpha		Immune	hemopoietic organ	L5D7
100144549	Fng	Participate in the regulation of the Notch signaling pathway	After RNAi, the normal function and appearance of Bombyx mori wings are compromised.	Epithelial 1	wing bud, Epidermis	L5D7
100144578	HPO	serine/threonine-protein kinase hippo		Apoptosis	wing bud, hemopoietic organ	L5D7
100216353	LOC100216353	Participate in autophagosome formation and regulate intracellular homeostasis		Apoptosis	hemopoietic organ	L5D7
100216492	Cyca	Facilitate cell transition from the S phase to the G2 and M phases		Immune	wing bud	L5D7
100529232	LOC100529232	amyloid precursor protein		Ciliated cell	wing bud, Larvae cuticle	L5D7
100579140	Bmptp-Z	Play an important role in neural system development		Cuticle 2	wing bud, Larvae cuticle	L5D7
101739893	LOC101739893	Key gene in the Wnt signaling pathway		Epithelial 1	wing bud, Epidermis	L5D7
101741357	LOC101741357	Affect the maintenance between dorsal and ventral wing epithelia	The expression of the Integrin β3 gene is significantly differentially expressed in the wing primordia of wild-type and the vesicular wing mutant w13 silkworms.	Immune	hemopoietic organ, wing bud	L5D7
692530	Cycb	Promote cell progression from the G2 phase to the M phase	RNAi inhibits cell proliferation, with a large number of cells arrested in the G2 phase, affecting the growth and development of the wing primordium.	Cuticle 3	Larvae cuticle, wing bud	P6
692576	Iap	Apoptosis inhibitor gene	After RNAi, indicators related to cell apoptosis increase.	Cuticle 3, Wing morphogenesis cell	wing bud, Larvae cuticle	P6
692643	LOC692643	Immune defense	Impaired immune ability of Bombyx mori after RNAi.	Epithelial 3	wing bud, hemopoietic organ	P6
692938	Atg8	Participate in the formation and maturation of autophagosomes, regulate the degradation and recycling of intracellular substances		Cuticle 3	Larvae cuticle, wing bud	P6
693070	Ftz-f1	Regulate Bombyx mori molting, development, and expression of cuticular protein genes	After RNAi, the development of Bombyx mori larvae exhibits significant abnormalities, preventing normal molting.	Cuticle 3	Larvae cuticle, wing bud	P6
100135424	abd-A	Abd-A interacts with BmPOUM2-L in the nucleus to jointly activate the expression of the wing disc cuticular protein gene BmWCP4	RNAi disrupts the normal interaction with BmPOUM2, etc., resulting in phenomena such as slowed cell proliferation and abnormal cell morphology.	Cuticle 3		P6
100188969	Dl	Participate in the Notch signaling pathway to regulate related developmental processes	After RNAi, the expression of cell cycle-related genes is affected, reducing the proportion of cells entering the mitotic phase and limiting the growth of wing primordia.	Cuticle 2, Cuticle 3	wing bud	P6
100216352	LOC100216352	Key gene in autophagy processes		Cuticle 3		P6
100322874	torso	Responsive to prothoracicotropic hormone signaling	Decreased wing primordium weight after RNAi	Cuticle 2, Cuticle 3		P6
101737038	LOC101737038	Facilitate Bombyx mori larval-pupal metamorphosis by transcriptionally regulating 20-hydroxyecdysone (20E) signaling	20E signaling is disrupted after RNAi; overexpression of the E93 gene enhances the activity of the 20E signaling pathway.	Cuticle 3		P6
101738782	LOC101738782	Regulate wing development	Omitted, duplicate item	Cuticle 3		P6
101745387	LOC101745387	Key genes involved in wing development	After RNAi, the adult wings are significantly reduced in size, and the flight muscle arrangement becomes irregular.	Cuticle 3	wing bud, Larvae cuticle	P6
101746494	LOC101746494	Negative regulator of the JAK/STAT signaling pathway		Cuticle 3	wing bud	P6
693011	E74	Regulate Bombyx mori nucleopolyhedrovirus (BmNPV) infection	Far-western blotting confirms the interaction between the ETS functional domain of E74A and viral proteins.	Apoptos	wing bud, hemopoietic organ	W1
100415910	Kr-h1	Inhibit 20E synthesis and downstream genes in the 20E signaling pathway	RNAi promotes the synthesis of 20E, advancing entry into differentiation and metamorphosis-related developmental stages.	Wing morphogenesis cell	wing bud	W1
101741481	LOC101741481	Regulate wing vein differentiation	After RNAi, cell proliferation and differentiation are hindered, leading to abnormal differentiation and formation of wing veins.	Epithelial 1	wing bud, Epidermis	W2

## Sheet: Table S5
Cluster	gene
1	Bmap-A
1	LOC101735714
1	LOC101746268
1	RpL23
1	CPH3
1	Sod2
1	LOC101741350
1	LOC101737662
1	RpL11
1	RpL37A
1	Mf-cpa
1	Ef1beta
1	RpL41
1	LOC101740476
1	PFN
1	LOC101746637
1	RpL19
1	LOC101740300
1	LOC101746072
1	LOC101744379
1	LOC692801
1	Lix1
1	LOC101737430
1	LOC101740723
1	Cbz
1	LOC101744039
1	LOC101740090
1	LOC101741198
1	MS
1	Chi
1	Chi-h
1	LOC100101187
1	LOC733105
1	LOC101746307
1	LOC110386081
1	LOC692400
1	LOC101737743
1	LOC101746207
1	CPR122
1	LOC101745698
1	LOC101746507
1	RpL7Ae
1	LOC101737511
1	LOC101738147
1	LOC101738702
1	LOC101743454
1	Ldlr
1	LOC101739453
1	RpS2e
1	LOC101736639
1	RpL21
1	LOC101746713
1	LOC692892
1	LOC101741137
1	LOC101742445
1	RpS3
1	LOC692991
1	brP-1649
1	RpP1
1	LOC101743813
1	LOC101746276
1	RpP0
1	Jafrac1
1	Gata-beta
1	LOC101745621
1	RpLP2
1	A3
1	FMO3
1	Ef-1g
1	LOC732926
1	LOC100144626
1	LOC100101183
1	CSP14
1	LOC101735635
1	LOC692655
1	CPR21
1	CPR146
1	RpL26
1	LOC692995
1	LOC692945
1	LOC101737658
1	LOC733028
1	LOC101741708
1	LOC101741743
1	LOC101736529
1	LOC101746322
1	LOC101736559
2	Miple
2	LOC101740424
2	LOC101736897
2	os
2	LOC101738839
2	LOC101736212
2	Inv
2	LOC101735876
2	LOC101741200
2	Fah
2	LOC101742593
2	LOC101743853
2	LOC105842389
2	LOC101741857
2	LOC101738434
2	LOC101745515
2	LOC101746347
2	LOC101737404
2	LOC101741073
2	LOC101741216
2	LOC101743645
2	LOC101735337
2	LOC101745629
2	LOC101742992
2	LOC101740863
2	LOC101741834
2	LOC101745980
2	LOC100286767
2	LOC100134928
2	LOC101737701
2	LOC101735895
2	fmxg9M19
2	LOC101740332
2	an-0147
2	LOC101740108
2	LOC101736196
2	nAChRa6
2	SPARC
2	Btl
2	serpin-10
2	LOC101736180
2	LOC101746936
2	LOC101746796
2	LOC101746693
2	LOC101747205
2	LOC692894
2	LOC101737576
2	LOC101746366
2	Cyp307a1
2	LOC101741085
2	LOC101739797
2	LOC101747010
2	LOC101743597
2	LOC101744796
2	LOC101746256
2	LOC101738491
2	LOC101743456
2	LOC101746425
2	LOC693032
2	LOC101740969
2	LOC101740545
2	LOC100862837
2	LOC692392
2	LOC101741577
2	LOC101740925
2	LOC101746432
2	brP-2095
2	LOC101741533
2	LOC101741252
2	LOC101740576
2	LOC110386795
2	LOC101739863
2	LOC101743739
2	LOC101736967
2	LOC101743158
2	LOC101735390
2	CPR56
2	LOC101743686
2	LOC101739270
2	serpin-9
2	CPG17
2	LOC101746167
2	Tinag
2	LOC101740099
2	LOC101739363
2	LOC101741484
2	Fkbp45
2	LOC101741678
2	LOC101744170
2	LOC101742732
2	LOC101742338
2	LOC101744528
2	LOC101738228
2	CPR46
2	CPR42
2	CPR23
2	LOC101744480
2	CPR28
2	CPR148
2	LOC101746799
2	LOC101737192
2	LOC101744888
2	LOC101745469
2	LOC101742691
2	CLIP11
2	LOC732949
2	LOC733001
2	LOC101737806
2	LOC101741141
2	LOC101745606
2	LOC101743216
2	LOC101738194
2	LOC101741697
2	LOC101745062
2	LOC101738651
2	LOC101742737
2	LOC692674
2	LOC101743883
2	LOC101746660
2	LOC101740841
2	LOC101737175
2	PPAE
3	Idgf
3	LOC105841466
3	LOC732945
3	LOC101740617
3	LOC101740837
3	LOC110385711
3	LOC101745921
3	LOC101746215
3	CPG10
3	LOC101738767
3	LOC101737872
3	Cb10
3	LOC101746063
3	LOC101745248
3	LOC101742383
3	LOC101739113
3	trh
3	LOC778506
3	LOC110385101
3	LOC101745995
3	CPR4
3	LOC101746917
3	ChiR1
3	LOC101742529
3	LOC101736156
3	LOC101735620
3	ae13
3	LOC101745970
3	LOC101742730
3	LOC101741873
3	LOC101737256
3	LOC101747129
3	LOC101741113
3	LOC101737390
3	LOC692632
3	LOC692390
3	LOC101746528
3	LOC119629990
3	CSP5
3	LOC692881
3	Tub3
3	LOC101746421
3	LOC101746634
3	LOC101741469
3	LOC101740121
3	LOC101736544
3	LOC101739565
3	LOC101743574
4	CPFL1
4	E(spl)mbeta
4	LOC101740269
4	CTL5
4	LOC101742822
4	LOC101736652
4	LOC105842274
4	LOC101746811
4	CecA
4	LOC101736716
4	CPR69
4	CPT3
4	CPG13
4	LOC101743908
4	LOC101745456
4	LOC101744922
4	LOC105842386
4	LOC101746589
4	LOC101737072
4	LOC101740648
4	LOC100500745
4	LOC101746664
4	LOC101744511
4	LOC119628346
4	LOC101739926
4	LOC101740062
4	LOC101746910
4	CPR74
4	Y-e
4	bcpi
4	CPG1
4	CPH32
4	CPG6
4	LOC101745826
4	LOC101745386
4	LOC101745531
4	LOC101745678
4	CPR10
4	LOC101738773
4	CSP10
4	CSP6
4	LOC101735305
4	Adamts-like
4	LOC692973
4	LOC100862772
4	LOC101742416
4	CPR91
4	CPR82
4	CPR37
4	LOC101741205
4	CPFL3
4	LOC100307012
4	LOC101741978
4	LOC101744120
4	CPR132
4	LOC101739821
4	LOC101740092
4	LOC101739536
4	LOC101739681
4	Hsp70
4	LOC101745500
4	LOC733093
4	LOC101735832
4	CPG24
4	LOC101739772
4	LOC101736833

## Sheet: Table S6
Gene name	Double-stranded primers	Wing mutation rate
EGFP	F: ggatcctaatacgactcactatagggCTGAAGTTCATCTGCAC	0
	R: ggatcctaatacgactcactatagggGTACAGCTCGTCCATG
Rfx	F: ggatcctaatacgactcactatagggCGCTTATGGCATCGTTGTGG	57.8% (52/90 WD and wing defects)
	R: ggatcctaatacgactcactatagggCTGATCCCCACCGGACTAGA
SfGFP	F:ggatcctaatacgactcactatagggTGGTCCCAATTCTCGTGGAAC	0
	R: ggatcctaatacgactcactatagggCTTGAAGTTGACCTTGATGCC
SfRfx	F: ggatcctaatacgactcactatagggCTGCTCGACCACTACGAGAC	46.7% (14/30 WD defects)
	R: ggatcctaatacgactcactatagggGAGCGCATTCAAGGCATCAG
*The wing discs and wings in the control group showed no significant changes after RNAi of EGFP; defects included lobe formation in larval wing discs or atrophy of wings in adult moths.

## Sheet: Table S7
ID	Gene Name	Type/Function	Classify
692756	EcR	20E ecdysteroid receptor	20E receptor
693034	USP	20-hydroxyecdysone receptor
692562	DHR3	hormone receptor
101741860	Activin	activin receptor
101741860	Punt	activin receptor
693011	E74	Ecdysone-induced protein	20E Cascade Reaction Protein
692595	E75	Ecdysone-induced protein
692523	Br-C	Key regulatory factor in the ecdysone cascade reaction
101737038	E93	Ecdysone-induced protein
733067	neverland	Desaturase-encoding oxygenase-like protein	Cascade Reaction-Related Enzyme
100127116	Phantom	Cytochrome P450 enzyme
101740233	Ras	Inosine-5'-monophosphate dehydrogenase
100141438	AKt	Serine/threonine protein kinase
100431180	Tor	Serine/threonine protein kinase
100329154	norpA	1-Phosphatidylinositol-4,5-bisphosphate phosphodiesterase
101745443	ATG1	Serine/threonine protein kinase
101746939	Ptp69D	Protein tyrosine phosphatase
6651521	LATS1	Acid phosphatase
101746046	amp	AMP deaminase
692643	Hemolin	Hemolymph protein-like protein (immune)	Immune-Related Factor
101739821	CECE	Antimicrobial peptide
692527	Glv2	Antimicrobial peptide
100146108	Leb3	Antimicrobial peptide
692641	yippee	Hemolymph protein-interacting protein; Yippee zinc finger protein	Related Functional Protein
101738782	TSL	Tsl membrane attack complex domain-containing protein with protein trunk-like structure
101744290	TrpA1	Transient receptor potential cation channel A1
101739907	TSC1	Tuberous sclerosis protein
692938	ATG8	Autophagy-related protein
692628	hemolymph protein isofomm	Juvenile hormone-binding protein
101742582	rho-GTPase-activating proteir	Rho GTPase-activating protein
101746825	nuclear valison containing protein	Protein containing a pre-mRNA domain
101741094	expressed protein	bHLH (a type of protein) expressed in the salivary gland
101738552	Smad2	Mothers against decapentaplegic homolog 3
101745398	Medea	Mothers against decapentaplegic homolog 4
692767	Ptth	Prothoracicotropic hormone
101742113	Babo	TGF-β receptor	Related Protein Receptor
101745072	chico	Insulin receptor
692560	InR	Insulin receptor
100322874	Thorso	Tyrosine protein kinase receptor
692747	antp	Homedomain transcription factor in the proximal promoter of the ecdysone biosynthesis enzyme gene	Transcription Factor
692604	caspase1	Apoptosis factor
6559751	GH19770	Lipopolysaccharide-induced tumor necrosis factor-α factor homolog
692781	eIF4A	Eukaryotic translation initiation factor
101742513	neurofibromon	Neurofibromin
693070	βFTZ-F1	Ecdysone response nuclear receptor transcription factor
693025	POUM2	Transcription factor for silkworm development and silk synthesis
692411	CPR45	Cuticle protein	Cuticle protein
692405	CPR95	Cuticle protein
692395	CPR103	Cuticle protein
692362	CPR2	Cuticle protein
692408	CPR71	Cuticle protein
100379326	CPR92	Cuticle protein
692550	CPR46	Cuticle protein
692800	CPR1	Cuticle protein
101745678	CPG46	Cuticle protein
692498	CPG12	Cuticle protein

## Sheet: table S8
Single nucleus cell libraries	Sample name	Timepoint	Tissue	Estimated number of cells	Median UMI counts per cell	Total genes detected	Mean genes per cell	nCells after filterd
1	0h_2	0h	Bombyx wing dics	11737	2346	15806	1595	10611
2	0h_v2	0h	Bombyx wing dics	16018	3778	15526	1854	13937
3	10min_v2	10min	Bombyx wing dics	15825	3653	15533	1839	13954
4	20min_v2	20min	Bombyx wing dics	16423	2615	15812	1590	14868
5	30min	30min	Bombyx wing dics	10414	2116	15804	1518	9449
6	40min	40min	Bombyx wing dics	14795	3737	15768	1972	13304
7	50min	50min	Bombyx wing dics	14078	2870	15826	1667	12915
8	60min	60min	Bombyx wing dics	13861	4135	15763	1988	12424
9	4h	4h	Bombyx wing dics	13312	3704	15820	1855	12208
10	6h	6h	Bombyx wing dics	13223	4186	15770	1993	12047

## Sheet: Table S9
gene	p_val	avg_log2FC	pct.1	pct.2	p_val_adj	timepoint
LOC101738162	0	2.4336	0.598	0.173	0	0h
CPH24	0	2.32333	0.979	0.295	0	0h
CPR46	0	2.3208	0.999	0.422	0	0h
CPH25	0	2.08346	0.805	0.199	0	0h
CPH34	0	2.05256	0.98	0.285	0	0h
LOC101738434	0	2.04335	0.602	0.216	0	0h
LOC101741978	0	1.98159	0.809	0.216	0	0h
CPR41	0	1.95883	1	0.353	0	0h
CPR4	0	1.91723	1	0.441	0	0h
CPR28	0	1.90854	0.821	0.222	0	0h
CPT1	0	1.89227	0.545	0.142	0	0h
CPG17	0	1.88469	0.995	0.651	0	0h
CPR2	0	1.85698	1	0.625	0	0h
CPR3	0	1.79988	0.999	0.344	0	0h
fmxg9M19	0	1.79469	0.745	0.29	0	0h
LOC101739926	0	1.78751	0.503	0.146	0	0h
CPR38	0	1.77216	0.987	0.293	0	0h
CSP4	0	1.74666	0.911	0.257	0	0h
CPG4	0	1.61582	0.945	0.292	0	0h
CPR5	0	1.59553	0.991	0.335	0	0h
CPG5	0	1.53824	0.984	0.29	0	0h
CPR34	0	1.50876	0.503	0.154	0	0h
CPR42	0	1.47423	0.531	0.185	0	0h
LOC100134928	0	1.34882	0.999	0.915	0	0h
CSP1	0	1.33261	0.831	0.252	0	0h
CPR56	0	1.32449	0.6	0.295	0	0h
LOC101746878	0	1.31151	0.71	0.439	0	0h
LOC732885	0	1.27182	0.808	0.446	0	0h
LOC733010	0	1.23453	0.849	0.508	0	0h
LOC101740647	0	1.18538	0.644	0.37	0	0h
CPR148	0	1.15856	0.605	0.324	0	0h
LOC101739260	0	1.14212	0.834	0.558	0	0h
serpin-10	0	1.03057	0.683	0.393	0	0h
LOC101737303	0	1.0124	0.521	0.324	0	0h
LOC101740962	0	0.978718	0.598	0.355	0	0h
LOC732993	0	0.973997	0.554	0.321	0	0h
LOC692810	0	0.915275	0.568	0.352	0	0h
GSTs1	0	0.877639	0.604	0.342	0	0h
LOC101742383	0	0.860199	0.836	0.566	0	0h
Fah	0	0.854558	0.527	0.332	0	0h
LOC692632	0	0.851342	0.647	0.401	0	0h
PPAE	0	0.845578	0.749	0.505	0	0h
LOC101740785	0	0.842632	0.528	0.36	0	0h
LOC733001	0	0.838745	0.714	0.5	0	0h
Pp	0	0.837063	0.539	0.354	0	0h
LOC101744161	0	0.828066	0.518	0.328	0	0h
LOC101735445	0	0.824733	0.838	0.663	0	0h
LOC692945	0	0.816365	0.727	0.483	0	0h
serpin-9	0	0.775104	0.821	0.522	0	0h
LOC101746272	0	0.753794	0.62	0.463	0	0h
LOC100141506	0	0.752081	0.674	0.453	0	0h
LOC101746322	0	0.740688	0.624	0.445	0	0h
LOC733126	0	0.734379	0.623	0.475	0	0h
LOC101745690	0	0.731788	0.501	0.363	0	0h
LOC101745123	0	0.71638	0.939	0.854	0	0h
CLIP11	0	0.705001	0.711	0.521	0	0h
LOC101746063	0	0.686689	0.575	0.411	0	0h
LOC692977	0	0.682181	0.589	0.457	0	0h
LOC101736101	0	0.674894	0.523	0.398	0	0h
Miple	0	0.659916	0.553	0.381	0	0h
LOC101736967	0	0.658157	0.725	0.502	0	0h
Tinag	0	0.646666	0.869	0.657	0	0h
LOC101744379	0	0.643043	0.989	0.884	0	0h
Inx2	0	0.629817	0.866	0.719	0	0h
LOC732949	0	0.627628	0.837	0.729	0	0h
SPARC	0	0.624374	0.99	0.934	0	0h
LOC101738101	0	0.621288	0.584	0.457	0	0h
LOC101746693	0	0.60931	0.653	0.475	0	0h
LOC692888	0	0.605371	0.602	0.45	0	0h
bcpi	0	0.59111	0.768	0.644	0	0h
LOC692906	0	0.579183	0.615	0.497	0	0h
LOC101742338	0	0.576642	0.674	0.5	0	0h
LOC101739504	0	0.569927	0.519	0.381	0	0h
LOC101740099	0	0.553438	0.98	0.906	0	0h
LOC693111	0	0.528814	0.799	0.683	0	0h
LOC100101160	0	0.52805	0.547	0.442	0	0h
LOC100862837	0	0.501969	0.627	0.463	0	0h
LOC101743309	#######	0.52659	0.514	0.41	#######	0h
LOC101743136	#######	0.505534	0.55	0.444	#######	0h
LOC101741882	#######	0.543	0.765	0.712	#######	0h
CPR53	0	2.58612	0.586	0.111	0	10min
CSP11	0	2.40601	0.97	0.289	0	10min
CPG51	0	2.35455	0.999	0.354	0	10min
CPR51	0	2.17677	0.999	0.396	0	10min
CPR341	0	2.16976	0.674	0.166	0	10min
CPR31	0	2.15144	1	0.406	0	10min
CPG41	0	2.12769	0.994	0.348	0	10min
CPR381	0	2.10936	0.998	0.357	0	10min
CPT11	0	2.0842	0.658	0.166	0	10min
CSP41	0	2.06947	0.969	0.312	0	10min
CPR32	0	2.0413	0.543	0.141	0	10min
CPR127	0	1.96186	0.544	0.142	0	10min
CPR411	0	1.93221	1	0.415	0	10min
CPR281	0	1.92654	0.886	0.27	0	10min
CPR43	0	1.86761	1	0.494	0	10min
CPH251	0	1.84788	0.85	0.251	0	10min
CPH341	0	1.81539	0.989	0.35	0	10min
LOC1017419781	0	1.79022	0.845	0.268	0	10min
LOC1017399261	0	1.77104	0.57	0.171	0	10min
LOC101743521	0	1.76335	0.518	0.167	0	10min
LOC101735763	0	1.67971	0.53	0.154	0	10min
LOC7328851	0	1.59533	0.912	0.467	0	10min
LOC1017406471	0	1.51445	0.771	0.38	0	10min
CPR21	0	1.49606	1	0.661	0	10min
os	0	1.49493	0.609	0.251	0	10min
CPR461	0	1.47826	0.999	0.476	0	10min
LOC7330101	0	1.44096	0.936	0.529	0	10min
CPG16	0	1.42771	0.539	0.228	0	10min
CPR561	0	1.39364	0.68	0.314	0	10min
CPH241	0	1.3931	0.98	0.359	0	10min
LOC101743035	0	1.36314	0.532	0.222	0	10min
CPH43	0	1.32049	0.663	0.346	0	10min
Fah1	0	1.30367	0.67	0.333	0	10min
PPAE1	0	1.23762	0.857	0.515	0	10min
serpin-91	0	1.21659	0.898	0.54	0	10min
LOC1017409621	0	1.19474	0.725	0.362	0	10min
Tinag1	0	1.14869	0.953	0.666	0	10min
CPR1481	0	1.13644	0.668	0.343	0	10min
LOC1001349281	0	1.11775	1	0.923	0	10min
LOC1017423831	0	1.11296	0.924	0.58	0	10min
GSTs11	0	1.09509	0.62	0.365	0	10min
serpin-101	0	1.07104	0.764	0.411	0	10min
CPG171	0	1.06791	0.985	0.685	0	10min
LOC101740330	0	1.06779	0.573	0.298	0	10min
LOC7330011	0	1.05659	0.809	0.509	0	10min
LOC101736248	0	1.01732	0.574	0.332	0	10min
LOC1017395041	0	1.01375	0.671	0.375	0	10min
LOC119629032	0	0.997013	0.558	0.289	0	10min
LOC6928101	0	0.979732	0.643	0.363	0	10min
LOC1017400991	0	0.97301	0.996	0.912	0	10min
LOC7329931	0	0.962685	0.597	0.338	0	10min
LOC101741531	0	0.955255	0.52	0.29	0	10min
LOC1017443791	0	0.926323	0.999	0.893	0	10min
CLIP111	0	0.903659	0.808	0.527	0	10min
LOC1017423381	0	0.891611	0.802	0.5	0	10min
Inx21	0	0.886453	0.941	0.723	0	10min
LOC1017441611	0	0.867195	0.604	0.335	0	10min
LOC101736629	0	0.867099	0.657	0.389	0	10min
LOC101740863	0	0.853424	0.785	0.531	0	10min
LOC1017381621	0	0.841837	0.518	0.223	0	10min
Crabp	0	0.841307	0.969	0.81	0	10min
LOC1017407851	0	0.837264	0.591	0.368	0	10min
LOC1017466931	0	0.833924	0.755	0.479	0	10min
LOC1017463221	0	0.810525	0.685	0.454	0	10min
LOC6929451	0	0.807368	0.775	0.5	0	10min
LOC119628334	0	0.803203	0.768	0.522	0	10min
LOC101739065	0	0.796154	0.612	0.389	0	10min
LOC1017373031	0	0.789309	0.556	0.338	0	10min
LOC101744785	0	0.787298	0.567	0.351	0	10min
LOC101742065	0	0.786705	0.541	0.304	0	10min
LOC6926321	0	0.777919	0.614	0.428	0	10min
Mre11	0	0.774191	0.565	0.359	0	10min
SPARC1	0	0.763775	0.997	0.939	0	10min
LOC101738839	0	0.754795	0.526	0.313	0	10min
LOC100037426	0	0.74618	0.777	0.573	0	10min
LOC101741200	0	0.743239	0.591	0.387	0	10min
LOC101737070	0	0.743182	0.566	0.368	0	10min
LOC1008628371	0	0.73844	0.714	0.467	0	10min
LOC1001011601	0	0.735905	0.643	0.44	0	10min
LOC1017384341	0	0.735416	0.503	0.265	0	10min
LOC101737545	0	0.733071	0.727	0.524	0	10min
LOC101745599	0	0.725985	0.557	0.384	0	10min
LOC6928881	0	0.710417	0.653	0.458	0	10min
LOC101739275	0	0.710053	0.507	0.332	0	10min
LOC1017456901	0	0.701947	0.561	0.368	0	10min
LOC101743364	0	0.697274	0.524	0.321	0	10min
LOC1017369671	0	0.696281	0.796	0.514	0	10min
LOC778526	0	0.681213	0.851	0.656	0	10min
LOC693032	0	0.668749	0.579	0.373	0	10min
LOC1017392601	0	0.658922	0.829	0.585	0	10min
LOC101743966	0	0.653103	0.904	0.719	0	10min
LOC101745402	0	0.638554	0.708	0.514	0	10min
serpin-5	0	0.637597	0.505	0.35	0	10min
LOC101736622	0	0.629061	0.639	0.458	0	10min
LOC101745731	0	0.622	0.659	0.474	0	10min
LOC732862	0	0.619328	0.622	0.45	0	10min
LOC101745150	0	0.618879	0.555	0.384	0	10min
LOC778461	0	0.607722	0.573	0.407	0	10min
LOC101740969	0	0.59141	0.552	0.369	0	10min
LOC1017451231	0	0.590089	0.967	0.859	0	10min
LOC6929771	0	0.588173	0.641	0.463	0	10min
LOC101737082	0	0.586611	0.657	0.489	0	10min
LOC7331261	0	0.579771	0.663	0.484	0	10min
LOC101735576	0	0.576231	0.697	0.489	0	10min
LOC101738119	0	0.574921	0.525	0.367	0	10min
fmxg9M191	0	0.572408	0.56	0.356	0	10min
LOC732998	0	0.571507	0.619	0.453	0	10min
LOC1017433091	0	0.558175	0.581	0.412	0	10min
LOC692592	0	0.557052	0.575	0.417	0	10min
LOC101746048	0	0.555989	0.651	0.452	0	10min
Sec61alpha	0	0.553636	0.735	0.573	0	10min
LOC692907	0	0.538972	0.628	0.46	0	10min
LOC100101178	0	0.533941	0.691	0.516	0	10min
CatD	0	0.532542	0.72	0.561	0	10min
LOC101739069	0	0.530096	0.703	0.512	0	10min
LOC1017354451	0	0.522458	0.862	0.677	0	10min
LOC732934	0	0.505543	0.662	0.512	0	10min
LOC1017361011	#######	0.557802	0.559	0.405	#######	10min
LOC778464	#######	0.553239	0.541	0.384	#######	10min
Atg8	#######	0.517357	0.596	0.443	#######	10min
LOC692887	#######	0.548885	0.524	0.37	#######	10min
LOC101747213	#######	0.557397	0.513	0.371	#######	10min
LOC692952	#######	0.516674	0.515	0.38	#######	10min
Pp1	#######	0.708412	0.513	0.375	#######	10min
LOC1001415061	#######	0.547137	0.636	0.479	#######	10min
CPG161	0	2.06825	0.542	0.225	0	20min
LOC6926322	0	1.52981	0.638	0.423	0	20min
LOC1017392602	0	1.489	0.863	0.579	0	20min
GSTs12	0	1.44313	0.59	0.367	0	20min
LOC1017468781	0	1.18516	0.694	0.465	0	20min
serpin-92	0	1.15955	0.762	0.556	0	20min
LOC1001415062	0	1.09873	0.637	0.477	0	20min
CSP12	0	1.06676	0.77	0.31	0	20min
LOC1017366291	0	1.02793	0.576	0.398	0	20min
CPG42	0	1.01295	0.886	0.357	0	20min
CSP42	0	0.921881	0.779	0.332	0	20min
CPR52	0	0.903441	0.961	0.397	0	20min
LOC7328852	0	0.873066	0.72	0.489	0	20min
CPR44	0	0.86778	1	0.49	0	20min
CPH242	0	0.845399	0.888	0.367	0	20min
CPG52	0	0.840913	0.944	0.356	0	20min
LOC1017406472	0	0.831461	0.55	0.406	0	20min
LOC1017419782	0	0.8184	0.545	0.303	0	20min
CPR382	0	0.815927	0.924	0.362	0	20min
CPR22	0	0.808364	0.991	0.659	0	20min
CPR282	0	0.775376	0.562	0.309	0	20min
CPH342	0	0.759521	0.858	0.362	0	20min
CPR412	0	0.739667	0.995	0.41	0	20min
CPG172	0	0.736247	0.925	0.69	0	20min
LOC7330012	0	0.722601	0.645	0.528	0	20min
PPAE2	0	0.716197	0.655	0.539	0	20min
CPH252	0	0.694175	0.522	0.29	0	20min
CPR33	0	0.677065	0.987	0.403	0	20min
LOC7330102	0	0.621445	0.726	0.554	0	20min
LOC1017443792	0	0.596509	0.979	0.895	0	20min
Lark	0	0.586825	0.751	0.7	0	20min
CPR462	0	0.543013	0.96	0.477	0	20min
Pdi	0	0.531439	0.859	0.818	0	20min
LOC1001349282	0	0.521133	0.997	0.923	0	20min
CLIP112	#######	0.586083	0.629	0.549	#######	20min
LOC101737749	#######	0.597246	0.643	0.555	#######	20min
LOC101738508	#######	0.565902	0.811	0.768	#######	20min
Tra2	#######	0.596679	0.66	0.607	#######	20min
LOC101744271	#######	0.560197	0.728	0.69	#######	20min
LOC101743498	#######	0.509278	0.621	0.56	#######	20min
Sec61alpha1	#######	0.507153	0.623	0.586	#######	20min
LOC1017466932	#######	0.560345	0.582	0.5	#######	20min
LOC1017408631	#######	0.632155	0.613	0.552	#######	20min
LOC1017390691	#######	0.521372	0.587	0.526	#######	20min
Rbp1	#######	0.545397	0.618	0.585	#######	20min
LOC1001011602	#######	0.519188	0.504	0.457	#######	20min
LOC101740648	0	3.34487	0.568	0.157	0	30min
Hsp20.1	0	1.59802	0.926	0.725	0	30min
LOC101742570	0	1.35933	0.642	0.409	0	30min
DnaJ-5	0	1.2168	0.762	0.635	0	30min
LOC101736219	0	1.14882	0.964	0.875	0	30min
LOC119629754	0	1.04417	0.574	0.352	0	30min
Samui	0	1.0121	0.684	0.567	0	30min
LOC101742452	0	0.939523	0.788	0.708	0	30min
Hsp90	0	0.917621	0.997	0.985	0	30min
LOC101736835	0	0.862957	0.76	0.663	0	30min
LOC101741350	0	0.837611	0.761	0.604	0	30min
LOC119630575	0	0.836585	0.786	0.654	0	30min
Crabp1	0	0.669179	0.885	0.823	0	30min
LOC778457	0	0.567607	0.85	0.851	0	30min
LOC101739953	#######	0.578347	0.58	0.438	#######	30min
LOC101741553	#######	0.973009	0.508	0.394	#######	30min
LOC119631129	#######	1.86272	0.576	0.518	#######	30min
Miple1	#######	0.868801	0.507	0.407	#######	30min
LOC101742445	#######	0.572031	0.728	0.724	#######	30min
LOC101743155	#######	0.718174	0.541	0.434	#######	30min
LOC101738787	#######	0.752406	0.515	0.421	#######	30min
LOC101744170	#######	0.762632	0.557	0.478	#######	30min
LOC1017418821	#######	0.661305	0.71	0.724	#######	30min
LOC101745176	#######	0.549934	0.578	0.517	#######	30min
LOC101738679	#######	0.733915	0.535	0.504	#######	30min
LOC6929452	4.2e-84	0.50038	0.574	0.527	6.48e-80	30min
LOC1196297541	0	1.96067	0.837	0.313	0	40min
LOC1017413501	0	1.47071	0.951	0.576	0	40min
Hsp23.7	0	1.1126	0.522	0.263	0	40min
LOC119629948	0	1.0877	0.572	0.343	0	40min
LOC1017399531	0	1.05201	0.806	0.407	0	40min
LOC1017425701	0	0.992527	0.733	0.39	0	40min
LOC1017368351	0	0.986948	0.911	0.641	0	40min
LOC1017387871	0	0.962612	0.696	0.396	0	40min
LOC1017362191	0	0.84293	0.99	0.869	0	40min
LOC101738321	0	0.835986	0.521	0.314	0	40min
Hsp20.11	0	0.815286	0.936	0.717	0	40min
LOC119628986	0	0.785011	0.844	0.608	0	40min
LOC101737452	0	0.771541	0.676	0.438	0	40min
LOC1017424521	0	0.747203	0.904	0.692	0	40min
PH	0	0.738679	0.518	0.338	0	40min
LOC101742601	0	0.719536	0.517	0.312	0	40min
LOC101737357	0	0.709858	0.597	0.396	0	40min
NGR-B1	0	0.692681	0.559	0.399	0	40min
LOC101738295	0	0.678702	0.648	0.437	0	40min
LOC101743802	0	0.667978	0.605	0.397	0	40min
E75	0	0.65047	0.751	0.483	0	40min
LOC1017431551	0	0.64986	0.71	0.41	0	40min
LOC101745102	0	0.622985	0.798	0.596	0	40min
LOC1017369672	0	0.615739	0.746	0.522	0	40min
LOC101737399	0	0.605175	0.813	0.642	0	40min
LOC1196305751	0	0.603961	0.9	0.636	0	40min
LOC1017386791	0	0.600686	0.682	0.486	0	40min
LOC101746057	0	0.595066	0.551	0.331	0	40min
LOC101746299	0	0.593744	0.598	0.413	0	40min
LOC6929453	0	0.588551	0.759	0.503	0	40min
LOC778505	0	0.572543	0.607	0.415	0	40min
LOC1017424451	0	0.565956	0.876	0.706	0	40min
Rel	0	0.564215	0.64	0.422	0	40min
LOC101741727	0	0.558799	0.647	0.48	0	40min
LOC101735390	0	0.546782	0.569	0.402	0	40min
Miple2	0	0.546714	0.593	0.393	0	40min
LOC105842657	0	0.537592	0.722	0.539	0	40min
LOC101747029	0	0.53725	0.677	0.492	0	40min
LOC1017451761	0	0.537072	0.668	0.504	0	40min
LOC101738514	0	0.53702	0.949	0.755	0	40min
LOC119630816	0	0.509491	0.706	0.538	0	40min
LOC101739106	#######	0.607928	0.502	0.348	#######	40min
LOC110385712	#######	0.598322	0.52	0.359	#######	40min
LOC101737178	#######	0.544784	0.568	0.413	#######	40min
LOC1017399532	0	1.63233	0.757	0.414	0	50min
LOC101737991	0	1.3497	0.6	0.389	0	50min
serpin-2	0	1.28765	0.725	0.589	0	50min
LOC101742925	0	1.28423	0.682	0.465	0	50min
LOC1196297542	0	1.25708	0.649	0.336	0	50min
Rel1	0	1.23185	0.644	0.422	0	50min
LOC101742699	0	1.2214	0.629	0.432	0	50min
LOC1017431552	0	1.22079	0.67	0.416	0	50min
LOC101745162	0	1.16859	0.506	0.352	0	50min
LOC1196305752	0	1.16837	0.854	0.643	0	50min
LOC1017374521	0	1.13851	0.621	0.445	0	50min
LOC1017382951	0	1.13348	0.6	0.443	0	50min
LOC101742298	0	1.09797	0.572	0.404	0	50min
LOC1017451021	0	1.08696	0.763	0.601	0	50min
LOC101740283	0	1.01247	0.639	0.466	0	50min
LOC101744205	0	0.985708	0.562	0.426	0	50min
LOC1017385141	0	0.980451	0.88	0.764	0	50min
LOC101737218	0	0.969335	0.544	0.417	0	50min
LOC732926	0	0.962626	0.546	0.395	0	50min
LOC100101209	0	0.928805	0.788	0.657	0	50min
LOC1017462991	0	0.899428	0.566	0.418	0	50min
E751	0	0.888496	0.693	0.49	0	50min
LOC1017438021	0	0.88258	0.549	0.405	0	50min
LOC1058426571	0	0.823228	0.662	0.547	0	50min
LOC101735654	0	0.816729	0.708	0.606	0	50min
LOC110386217	0	0.734844	0.908	0.878	0	50min
LOC101737919	0	0.73164	0.928	0.912	0	50min
Cbz	0	0.566526	0.86	0.757	0	50min
LOC100500932	#######	0.980459	0.573	0.462	#######	50min
Anxb13	#######	0.663778	0.69	0.6	#######	50min
LOC101737540	#######	0.829727	0.596	0.492	#######	50min
dcr-2	#######	0.817374	0.558	0.438	#######	50min
LOC101735777	#######	0.599169	0.738	0.674	#######	50min
LOC100101174	#######	0.527408	0.793	0.745	#######	50min
LOC101736421	#######	0.711429	0.698	0.638	#######	50min
LOC101745688	#######	0.752529	0.571	0.468	#######	50min
LOC101742624	#######	0.633524	0.816	0.785	#######	50min
LOC1017415531	#######	1.0757	0.5	0.391	#######	50min
Lpr	#######	0.660441	0.582	0.481	#######	50min
LOC1017387872	#######	0.539536	0.543	0.415	#######	50min
LOC778502	#######	0.536994	0.643	0.563	#######	50min
LOC101740714	#######	0.992983	0.513	0.414	#######	50min
LOC101737256	#######	1.01808	0.504	0.407	#######	50min
LOC101736853	#######	1.10087	0.517	0.414	#######	50min
Gata-beta	#######	0.640586	0.551	0.459	#######	50min
LOC692743	#######	0.917231	0.606	0.515	#######	50min
LOC101735454	#######	0.526915	0.71	0.664	#######	50min
Stat	#######	0.657163	0.562	0.48	#######	50min
LOC101735337	#######	0.528512	0.666	0.61	#######	50min
LOC101740817	#######	0.592211	0.634	0.577	#######	50min
Ets	#######	0.759875	0.514	0.437	#######	50min
LOC101746981	#######	0.543369	0.519	0.438	#######	50min
LOC101745117	#######	0.581003	0.563	0.499	#######	50min
LOC101742811	#######	0.637641	0.611	0.555	#######	50min
LOC101736643	#######	0.605944	0.555	0.482	#######	50min
LOC101743001	1.67e-99	0.557426	0.561	0.514	2.57e-95	50min
LOC101745606	1.7e-92	0.556618	0.531	0.464	2.62e-88	50min
LOC101744580	2.44e-80	0.505074	0.506	0.456	3.76e-76	50min
LOC733121	1.03e-63	0.510082	0.552	0.515	1.59e-59	50min
LOC101743890	2.06e-44	0.575252	0.539	0.51	3.18e-40	50min
LOC101741233	3.35e-25	0.530247	0.62	0.622	5.16e-21	50min
LOC101736335	0	1.30027	0.51	0.249	0	60min
LOC1017399533	0	1.13274	0.766	0.414	0	60min
LOC1196289861	0	1.02788	0.745	0.621	0	60min
LOC101737743	0	1.02075	0.807	0.655	0	60min
LOC1017391061	0	1.00088	0.538	0.345	0	60min
CCE-un1	0	0.972908	0.702	0.514	0	60min
LOC1196297543	0	0.965957	0.646	0.338	0	60min
E752	0	0.92608	0.79	0.48	0	60min
Rel2	0	0.920578	0.675	0.42	0	60min
LOC101746014	0	0.892423	0.615	0.413	0	60min
LOC1017431553	0	0.890508	0.749	0.408	0	60min
LOC101746512	0	0.881964	0.529	0.275	0	60min
LOC1017385142	0	0.873999	0.897	0.763	0	60min
LOC100313953	0	0.870952	0.518	0.353	0	60min
LOC1017379911	0	0.832511	0.605	0.389	0	60min
LOC1017426011	0	0.740314	0.524	0.312	0	60min
LOC7329261	0	0.729339	0.584	0.392	0	60min
LOC1017402831	0	0.723678	0.661	0.464	0	60min
LOC1017429251	0	0.715834	0.691	0.465	0	60min
LOC1017422981	0	0.67539	0.582	0.404	0	60min
LOC1017374522	0	0.672326	0.633	0.444	0	60min
LOC1017375401	0	0.665945	0.636	0.488	0	60min
LOC101739958	0	0.663991	0.855	0.495	0	60min
LOC1017373571	0	0.658438	0.58	0.4	0	60min
LOC101739890	0	0.656974	0.501	0.327	0	60min
LOC101743038	0	0.650657	0.716	0.555	0	60min
LOC732866	0	0.630143	0.65	0.468	0	60min
LOC101739681	0	0.625469	0.844	0.484	0	60min
LOC1017426991	0	0.616199	0.611	0.435	0	60min
serpin-21	0	0.613663	0.742	0.588	0	60min
Anxb131	0	0.607906	0.766	0.592	0	60min
LOC101740092	0	0.597559	0.875	0.504	0	60min
LOC1017451171	0	0.597348	0.654	0.489	0	60min
LOC101742213	0	0.594304	0.583	0.409	0	60min
LOC100101161	0	0.570874	0.875	0.725	0	60min
LOC1017438022	0	0.569533	0.58	0.402	0	60min
LOC101739536	0	0.563694	0.788	0.443	0	60min
Pabp	0	0.554026	0.889	0.732	0	60min
Fkbp45	0	0.537677	0.888	0.802	0	60min
LOC101736559	0	0.525389	0.746	0.557	0	60min
Hsc70-4	0	0.508804	1	0.997	0	60min
LOC101739334	#######	0.627852	0.507	0.339	#######	60min
CREB	#######	0.608306	0.512	0.343	#######	60min
LOC1005009321	#######	0.642863	0.618	0.457	#######	60min
LOC778479	#######	0.553476	0.502	0.344	#######	60min
LOC101743573	#######	0.608979	0.505	0.361	#######	60min
CLIP3	#######	0.855542	0.523	0.375	#######	60min
LOC1017372181	#######	0.586215	0.558	0.416	#######	60min
LOC110386081	#######	0.555992	0.747	0.629	#######	60min
LOC692392	#######	0.723965	0.547	0.419	#######	60min
LOC6927431	#######	0.785634	0.646	0.511	#######	60min
LOC1017412331	2.28e-56	0.53985	0.681	0.615	3.52e-52	60min
Let-2	4.24e-16	0.550483	0.794	0.775	6.54e-12	60min
Grf	0	2.57356	0.552	0.129	0	4h
Hr3	0	2.50705	0.917	0.243	0	4h
LOC101742685	0	2.23451	0.56	0.173	0	4h
LOC1017465121	0	2.12722	0.782	0.249	0	4h
CecA	0	1.94187	0.715	0.217	0	4h
LOC692995	0	1.80685	0.543	0.227	0	4h
LOC1017396811	0	1.69946	0.95	0.474	0	4h
LOC1017395361	0	1.63571	0.917	0.43	0	4h
LOC101737461	0	1.63487	0.769	0.471	0	4h
LOC1017400921	0	1.63367	0.966	0.495	0	4h
LOC101735359	0	1.6147	0.585	0.257	0	4h
LOC1017399581	0	1.58165	0.942	0.486	0	4h
LOC101742792	0	1.57282	0.562	0.213	0	4h
LOC101746663	0	1.55401	0.588	0.283	0	4h
6tox	0	1.45931	0.644	0.27	0	4h
LOC101739184	0	1.35203	0.538	0.25	0	4h
LOC101736639	0	1.3065	0.529	0.271	0	4h
LOC101737032	0	1.30631	0.768	0.477	0	4h
LOC101739525	0	1.26271	0.628	0.391	0	4h
LOC101743180	0	1.25383	0.704	0.405	0	4h
A3	0	1.22043	0.749	0.452	0	4h
LOC101747051	0	1.21665	0.504	0.282	0	4h
LOC101738805	0	1.21663	0.667	0.37	0	4h
LOC101737442	0	1.21079	0.639	0.384	0	4h
LOC101745054	0	1.19656	0.528	0.289	0	4h
LOC101746352	0	1.13952	0.629	0.329	0	4h
LOC1017366431	0	1.10833	0.717	0.465	0	4h
LOC1017460141	0	1.09559	0.708	0.404	0	4h
LOC101737978	0	1.09257	0.63	0.368	0	4h
LOC1017368531	0	1.08968	0.604	0.406	0	4h
LOC110385370	0	1.05275	0.75	0.502	0	4h
LOC101747230	0	1.02504	0.581	0.344	0	4h
LOC101743877	0	1.01491	0.61	0.371	0	4h
LOC101741938	0	0.939116	0.59	0.367	0	4h
LOC101742325	0	0.937972	0.5	0.32	0	4h
LOC100141438	0	0.937968	0.612	0.379	0	4h
LOC101741339	0	0.92154	0.586	0.396	0	4h
LOC101739010	0	0.916122	0.509	0.326	0	4h
LOC692881	0	0.886805	0.655	0.458	0	4h
LOC1017442051	0	0.86887	0.624	0.42	0	4h
LOC1017422131	0	0.865115	0.613	0.406	0	4h
LOC101737415	0	0.852342	0.501	0.306	0	4h
LOC101739199	0	0.842302	0.545	0.363	0	4h
Cbz1	0	0.820143	0.952	0.748	0	4h
myc	0	0.81689	0.69	0.469	0	4h
LOC101745975	0	0.804991	0.545	0.369	0	4h
LOC101740203	0	0.802104	0.526	0.36	0	4h
Leb3	0	0.788441	0.556	0.369	0	4h
LOC101736823	0	0.787615	0.526	0.362	0	4h
GSTd2	0	0.778431	0.919	0.736	0	4h
LOC1196305753	0	0.758947	0.825	0.647	0	4h
LOC101739326	0	0.758421	0.596	0.409	0	4h
LOC101742268	0	0.745707	0.534	0.374	0	4h
LOC1001012091	0	0.72963	0.816	0.655	0	4h
LOC101743381	0	0.721286	0.522	0.358	0	4h
LOC1017438901	0	0.72065	0.676	0.495	0	4h
LOC101742289	0	0.718569	0.805	0.609	0	4h
dcr-21	0	0.715812	0.618	0.433	0	4h
LOC101742403	0	0.714415	0.544	0.385	0	4h
LOC7329262	0	0.711973	0.595	0.391	0	4h
LOC733020	0	0.695814	0.559	0.391	0	4h
LOC1017372182	0	0.693864	0.602	0.411	0	4h
Tudor-SN	0	0.693689	0.556	0.395	0	4h
LOC101743511	0	0.691345	0.84	0.641	0	4h
LOC101741049	0	0.690527	0.632	0.446	0	4h
LOC101741956	0	0.684036	0.884	0.789	0	4h
E753	0	0.665779	0.711	0.49	0	4h
LOC1017431554	0	0.651797	0.658	0.419	0	4h
LOC101737787	0	0.636465	0.513	0.346	0	4h
LOC101735425	0	0.634795	0.603	0.437	0	4h
Sop2	0	0.607914	0.638	0.464	0	4h
LOC101739346	0	0.606841	0.714	0.557	0	4h
LOC101736050	0	0.585164	0.629	0.46	0	4h
LOC101742474	0	0.560141	0.699	0.544	0	4h
LOC733028	0	0.556331	0.847	0.713	0	4h
LOC1017413502	0	0.516879	0.784	0.597	0	4h
LOC7785021	#######	0.523858	0.711	0.557	#######	4h
LOC1017426241	#######	0.505579	0.864	0.78	#######	4h
Stat1	#######	0.60702	0.632	0.473	#######	4h
LOC101736848	#######	0.633307	0.592	0.436	#######	4h
LOC101736214	#######	0.579277	0.563	0.399	#######	4h
LOC101747020	#######	0.514355	0.725	0.59	#######	4h
LOC6927432	#######	0.547859	0.676	0.508	#######	4h
LOC1017377431	#######	0.572326	0.781	0.658	#######	4h
LOC101737365	#######	0.649695	0.501	0.343	#######	4h
LOC1003139531	#######	0.642346	0.505	0.354	#######	4h
LOC7784791	#######	0.597778	0.5	0.345	#######	4h
LOC1103857121	#######	0.54873	0.525	0.359	#######	4h
LOC1017422982	#######	0.59554	0.556	0.407	#######	4h
LOC101743013	#######	0.672223	0.524	0.375	#######	4h
LOC101744433	#######	0.565292	0.687	0.563	#######	4h
LOC1017375402	#######	0.552344	0.627	0.489	#######	4h
LOC101737313	#######	0.716004	0.54	0.398	#######	4h
E74	#######	0.599312	0.522	0.375	#######	4h
Hsp21.4	#######	0.544647	0.619	0.475	#######	4h
LOC1017430011	#######	0.559479	0.635	0.506	#######	4h
LOC1017435731	#######	0.680434	0.5	0.362	#######	4h
LOC101745417	#######	0.597689	0.586	0.455	#######	4h
LOC101743108	#######	0.54957	0.508	0.366	#######	4h
LOC101746243	#######	0.602217	0.517	0.386	#######	4h
LOC1017407141	#######	0.740007	0.549	0.411	#######	4h
LOC101738072	#######	0.676655	0.515	0.39	#######	4h
LOC101737533	#######	0.556064	0.539	0.408	#######	4h
CDC2L1	#######	0.540767	0.542	0.41	#######	4h
LOC101741314	#######	0.556527	0.528	0.399	#######	4h
CPR211	#######	0.705616	0.635	0.482	#######	4h
LOC101737962	#######	0.509302	0.67	0.546	#######	4h
LOC101741025	#######	0.508119	0.607	0.481	#######	4h
LOC101735495	#######	0.514283	0.614	0.498	#######	4h
LOC101740483	#######	0.505488	0.54	0.41	#######	4h
LOC100500745	#######	0.551477	0.683	0.573	#######	4h
LOC101739809	#######	0.531671	0.558	0.444	#######	4h
LOC1017372561	#######	0.558963	0.522	0.405	#######	4h
LOC101738141	#######	0.512521	0.531	0.421	#######	4h
LOC101742438	#######	0.524125	0.54	0.442	#######	4h
serpin-1	2.15e-18	0.515048	0.759	0.752	3.32e-14	4h
Ldh	0	3.4287	0.553	0.085	0	6h
Ldlr	0	2.97807	0.525	0.096	0	6h
Hr31	0	2.93503	0.969	0.239	0	6h
LOC1017426851	0	2.67535	0.659	0.163	0	6h
CecA1	0	2.57789	0.833	0.205	0	6h
LOC101737430	0	2.54905	0.601	0.179	0	6h
LOC101743336	0	2.4978	0.603	0.124	0	6h
LOC1017395362	0	2.08506	0.958	0.426	0	6h
6tox1	0	2.06158	0.727	0.262	0	6h
LOC1017400922	0	2.03032	0.983	0.494	0	6h
Grf1	0	1.97826	0.544	0.13	0	6h
glv4-like	0	1.90831	0.548	0.171	0	6h
LOC1017399582	0	1.90151	0.97	0.484	0	6h
LOC1017396812	0	1.88523	0.969	0.472	0	6h
LOC1017419381	0	1.88469	0.765	0.349	0	6h
LOC1017465122	0	1.85158	0.748	0.253	0	6h
LOC1017353591	0	1.8391	0.629	0.253	0	6h
BGRP2	0	1.80979	0.57	0.195	0	6h
LOC101741941	0	1.74572	0.597	0.214	0	6h
Leb31	0	1.64921	0.731	0.35	0	6h
LOC1017366391	0	1.59656	0.588	0.265	0	6h
A31	0	1.57202	0.831	0.444	0	6h
LOC1001414381	0	1.57123	0.762	0.363	0	6h
LOC1017427921	0	1.52235	0.601	0.209	0	6h
CPR212	0	1.51491	0.848	0.46	0	6h
LOC1017374611	0	1.48391	0.809	0.467	0	6h
LOC6929951	0	1.44617	0.531	0.228	0	6h
LOC1017435111	0	1.43033	0.945	0.631	0	6h
LOC1017395251	0	1.41877	0.72	0.382	0	6h
LOC101739441	0	1.36707	0.773	0.465	0	6h
LOC101746462	0	1.34173	0.533	0.259	0	6h
LOC1017450541	0	1.3229	0.581	0.284	0	6h
LOC1017470511	0	1.31658	0.563	0.276	0	6h
LOC1017466631	0	1.29482	0.6	0.282	0	6h
LOC101746626	0	1.27638	0.538	0.257	0	6h
LOC101741085	0	1.24864	0.514	0.264	0	6h
Lzm	0	1.18377	0.537	0.246	0	6h
LOC1017391841	0	1.1787	0.552	0.249	0	6h
LOC1017370321	0	1.1697	0.782	0.476	0	6h
LOC692801	0	1.16353	0.514	0.248	0	6h
LOC1017431801	0	1.16301	0.712	0.405	0	6h
LOC101740228	0	1.13956	0.515	0.225	0	6h
LOC101742410	0	1.13842	0.522	0.256	0	6h
LOC101742334	0	1.13265	0.531	0.269	0	6h
LOC1017463521	0	1.12024	0.675	0.325	0	6h
LOC1017379781	0	1.11284	0.68	0.363	0	6h
LOC6928811	0	1.09669	0.703	0.453	0	6h
LOC1017368231	0	1.09173	0.607	0.353	0	6h
LOC101740476	0	1.07573	0.542	0.264	0	6h
slmo	0	1.04867	0.601	0.326	0	6h
LOC1017374151	0	1.02213	0.558	0.301	0	6h
LOC1017366432	0	1.00496	0.752	0.461	0	6h
GSTd21	0	0.999631	0.958	0.732	0	6h
Cbz2	0	0.991221	0.98	0.745	0	6h
LOC1017462992	0	0.980822	0.663	0.408	0	6h
LOC1017388051	0	0.970583	0.689	0.368	0	6h
LOC7330281	0	0.968424	0.926	0.705	0	6h
Sop21	0	0.963189	0.742	0.453	0	6h
LOC1196311291	0	0.958248	0.722	0.501	0	6h
LOC101740327	0	0.951123	0.521	0.289	0	6h
LOC1017422891	0	0.935573	0.869	0.603	0	6h
LOC101735648	0	0.918136	0.557	0.31	0	6h
LOC1017410491	0	0.907207	0.704	0.439	0	6h
LOC100862759	0	0.891792	0.554	0.32	0	6h
LOC101741305	0	0.884946	0.532	0.296	0	6h
LOC1017393261	0	0.875219	0.645	0.404	0	6h
LOC1017424031	0	0.866783	0.605	0.379	0	6h
LOC101744203	0	0.865715	0.81	0.555	0	6h
LOC101735549	0	0.859846	0.657	0.386	0	6h
LOC101736001	0	0.855842	0.524	0.323	0	6h
AnnIX	0	0.85199	0.996	0.931	0	6h
LOC1103853701	0	0.850457	0.751	0.503	0	6h
LOC1017413391	0	0.845713	0.625	0.392	0	6h
LOC1017472301	0	0.844913	0.588	0.344	0	6h
LOC1017362141	0	0.843732	0.642	0.391	0	6h
LOC101746121	0	0.839508	0.896	0.688	0	6h
PFN	0	0.813629	0.976	0.839	0	6h
Hsp21.41	0	0.809204	0.714	0.465	0	6h
LOC101738358	0	0.807856	0.518	0.297	0	6h
LOC1017374421	0	0.801226	0.619	0.387	0	6h
LOC1017377871	0	0.796455	0.583	0.339	0	6h
LOC101741510	0	0.784119	0.512	0.34	0	6h
CREB1	0	0.778188	0.569	0.338	0	6h
LOC1017391991	0	0.776399	0.575	0.36	0	6h
E754	0	0.776356	0.794	0.481	0	6h
LOC101744116	0	0.775206	0.535	0.332	0	6h
LOC101740267	0	0.768815	0.547	0.335	0	6h
LOC1017390101	0	0.765967	0.543	0.323	0	6h
LOC1017438771	0	0.757058	0.619	0.37	0	6h
LOC1017470201	0	0.751713	0.806	0.581	0	6h
LOC101738677	0	0.749304	0.512	0.302	0	6h
LOC1017451022	0	0.737819	0.813	0.597	0	6h
Tudor-SN1	0	0.734365	0.612	0.39	0	6h
LOC1001011741	0	0.731132	0.908	0.734	0	6h
LOC733012	0	0.730825	0.761	0.527	0	6h
LOC1017402031	0	0.729437	0.536	0.359	0	6h
LOC1017360501	0	0.726899	0.686	0.454	0	6h
LOC1017454171	0	0.726655	0.645	0.449	0	6h
LOC101742099	0	0.725185	0.537	0.358	0	6h
LOC1017354251	0	0.717951	0.654	0.432	0	6h
LOC101736734	0	0.712016	0.585	0.382	0	6h
LOC733143	0	0.704206	0.585	0.377	0	6h
LOC1017393461	0	0.702736	0.779	0.551	0	6h
LOC101746301	0	0.698815	0.5	0.319	0	6h
LOC733058	0	0.692607	0.569	0.357	0	6h
LOC101736630	0	0.68879	0.833	0.617	0	6h
LOC1017460142	0	0.687266	0.692	0.406	0	6h
Rab11	0	0.683458	0.644	0.429	0	6h
LOC101741546	0	0.683106	0.518	0.317	0	6h
LOC7330201	0	0.665169	0.621	0.384	0	6h
LOC101735385	0	0.665042	0.633	0.413	0	6h
dcr-22	0	0.660605	0.648	0.43	0	6h
LOC692985	0	0.658319	0.558	0.362	0	6h
LOC101745094	0	0.644989	0.507	0.319	0	6h
LOC7784792	0	0.644484	0.548	0.34	0	6h
LOC1017379621	0	0.64345	0.753	0.537	0	6h
LOC101746584	0	0.638252	0.604	0.435	0	6h
LOC100101187	0	0.63809	0.644	0.433	0	6h
LOC1103857122	0	0.635935	0.575	0.354	0	6h
LOC1017422132	0	0.634652	0.609	0.406	0	6h
LOC101743323	0	0.631496	0.852	0.687	0	6h
LOC101738402	0	0.626505	0.856	0.792	0	6h
LOC1017459751	0	0.621605	0.551	0.369	0	6h
LOC732932	0	0.614561	1	0.976	0	6h
LOC101746228	0	0.613244	0.588	0.398	0	6h
LOC101735383	0	0.609248	0.527	0.336	0	6h
Rel3	0	0.606266	0.686	0.419	0	6h
Rabb	0	0.604016	0.685	0.476	0	6h
LOC1017438902	0	0.600676	0.711	0.492	0	6h
LOC101742149	0	0.598068	0.593	0.416	0	6h
LOC7329263	0	0.597888	0.624	0.388	0	6h
LOC100174852	0	0.594649	0.506	0.326	0	6h
LOC101743840	0	0.589982	0.706	0.507	0	6h
LOC1017373651	0	0.585671	0.536	0.34	0	6h
Chc	0	0.583322	0.626	0.442	0	6h
LOC733089	0	0.581607	0.695	0.485	0	6h
LOC7328661	0	0.580373	0.671	0.466	0	6h
LOC101746356	0	0.574663	0.558	0.37	0	6h
LOC101740635	0	0.574407	0.545	0.363	0	6h
Tub3	0	0.570474	0.677	0.461	0	6h
LOC119629027	0	0.570292	0.772	0.592	0	6h
LOC1017451172	0	0.565404	0.673	0.488	0	6h
LOC101736354	0	0.557566	0.51	0.32	0	6h
LOC101735320	0	0.544285	0.664	0.479	0	6h
LOC100101180	0	0.544083	0.97	0.872	0	6h
LOC101742358	0	0.543606	0.801	0.625	0	6h
LOC1017387873	0	0.538805	0.656	0.404	0	6h
Hsc70-41	0	0.535634	1	0.997	0	6h
LOC101746819	0	0.533583	0.661	0.466	0	6h
LOC101744610	0	0.532359	0.655	0.465	0	6h
LOC692955	0	0.530037	0.617	0.433	0	6h
LOC1017424741	0	0.528438	0.73	0.541	0	6h
LOC101742794	0	0.527706	0.606	0.416	0	6h
LOC101736945	0	0.518716	0.695	0.519	0	6h
LOC101744247	0	0.515823	0.674	0.483	0	6h
Sui1	0	0.51562	0.839	0.666	0	6h
Sqd	0	0.503663	0.997	0.962	0	6h
Ybp	0	0.500663	0.97	0.859	0	6h
LOC101740600	#######	0.690601	0.634	0.46	#######	6h
LOC101739863	#######	0.515705	0.506	0.316	#######	6h
LOC101735956	#######	0.507441	0.542	0.362	#######	6h
LOC101737963	#######	0.509094	0.623	0.447	#######	6h
LOC101735859	#######	0.549711	0.512	0.341	#######	6h
LOC1017410251	#######	0.502084	0.648	0.477	#######	6h
Iap	#######	0.526863	0.515	0.342	#######	6h
LOC1005007451	#######	0.701676	0.716	0.57	#######	6h
LOC101737576	#######	0.506045	0.63	0.452	#######	6h
LOC692984	#######	0.534694	0.512	0.346	#######	6h
LOC100862770	#######	0.512907	0.526	0.354	#######	6h
LOC1017422681	#######	0.579373	0.535	0.375	#######	6h
LOC100862825	#######	0.509321	0.513	0.346	#######	6h
LOC101737718	#######	0.524351	0.515	0.35	#######	6h
LOC101745039	#######	0.509588	0.635	0.477	#######	6h
LOC101745835	#######	0.572665	0.511	0.354	#######	6h
CKIalpha	#######	0.50265	0.524	0.359	#######	6h
LOC101746253	#######	0.520839	0.574	0.413	#######	6h
LOC778467	#######	0.503485	0.531	0.369	#######	6h
LOC1017462431	#######	0.546851	0.535	0.384	#######	6h
LOC1017380721	#######	0.545001	0.529	0.389	#######	6h
LOC1017373131	#######	0.51826	0.544	0.398	#######	6h

[truncated: 3 more sheets: table S10, Table S11, table S12]
